# Supplementary material
Source: MDPI journal article supplement (https://www.mdpi.com/1424-2818/15/3/318)
Supplement: s1 [file s1]

## Institutional Abbreviations

**AA.MEM.DS** – Université Cadi Ayyad, Marrakech, Morocco

**AMNH** – American Museum of Natural History, New York, New York, USA

**AMS** – Australian Museum, Sydney, Australia

**ANSP** – Academy of Natural Sciences, Philadelphia, Pennsylvania, USA

**ASIZP** – Biodiversity Research Museum, Chinese Academy of Sciences, Nankang, Taipei City, Taiwan

**AtlantNIRO** – Atlantic Scientific Research Institute of Marine Fisheries and Oceanography, Kaliningrad, Russia

**AUBM** – American University of Beirut, Beirut, Lebanon

**AZUSC** – Acervo Zoológico da Universidade Santa Cecília, Santos, Brazil

**BMNH** – The Natural History Museum (London), London, U.K.

Note: these are specimens referred to in older studies before the institutions abbreviation change to NHMUK, abbreviations are kept the same here for easier reference to cited study.

**BPBM** – Bernice Pauahi Bishop Museum, Department of Zoology, Honolulu, Hawaii, USA

**BRT-I** – Blue Resources Trust Ichthyology Collection (BRT-I) Sri Lanka

**CAS (incl. CAS SU)** – California Academy of Sciences, San Francisco, California, USA

**CBM-ZF** – Natural History Museum & Institute, Chiba, Japan

**CCC** – Coelacanth Conservation Council (no address). Numbers are not specimen numbers but internal numbering system within cited references.

**CICIMAR-CI** – Ichthyological Collection, Centro Interdisciplinario de Ciencias Marinas, La Paz, Baja California Sur, Mexico

**CI-UABC** – Ichthyology Collection, Universidad Autónoma de Baja California, Ensenada, Baja California, Mexico

**CMC** – Canterbury Museum, Christchurch, New Zealand

**CMFRI** – Marine Biodiversity Museum, Central Marine Fisheries Research Institute, Kochi, India

**CMK** – Maurice Kottelat, personal collection

**CMNH** – Cleveland Museum of Natural History, Cleveland, Ohio, USA

**CNPE-IBUNAM** – Colección Nacional de Peces of the Instituto de Biología, Universidad Nacional Autónoma de México, Mexico City, Mexico

**CNPICT** – Centro Nacional Patagónico, Puerto Madryn, Argentina

**COLETA** – Institute of Marine Research (IMAR - Azores), Portugal

**CSIRO** – Australian National Fish Collection, Hobart, Tasmania

**DSZ** – Department of Animal Science, University of Sassari, Sassari, Italy

**DU-FS** - KaziZaker Husain Museum of the Department of Zoology, University of Dhaka, Dhaka, Bangladesh

**EBFS** – Department of Environmental Biology and Fisheries Science, National Taiwan Ocean University, Keelung, Taiwan.

**ECOSC** – El Colegio de la Frontera Sur, San Cristóbal de Las Casas, Mexico

**ERB** – Elasmobranch Research Belgium, Berlaar, Belgium

**ESFM-PIS** – Fisheries Faculty, Ege University, Bornova/İzmir, Turkey

**FAKU** – Kyoto University Museum, Kyoto, Japan

**FMNH** – The Field Museum, Chicago, USA

**FMRI (MMMC)** – Marine Biodiversity Museum of Mandapam Regional Centre, Central Marine Fisheries Research Institute (CMFRI), Mandapam, Ramanathapuram District, India

**FSB** – Faculté des Sciences Biologiques (FSB), Université des sciences et de la technologie Houari-Boumediene (USTHB), Bab Ezzouar, Algeria

**FSBC** – Florida State Biodiversity Collection, St. Petersburg, Florida, USA

**FST** – Faculté des Sciences de Tunis, University of Tunis El Manar, Tunis, Tunisia

**FUMT** – Department of Fisheries, University Museum, University of Tokyo (FUMT) [specimens now catalogued in National Science Museum, Department of Zoology, Tokyo, Japan]

**GAFR** – Ichthyological Collection of the General Commission for Fisheries Resources Lattakia, Syria

**GCRL** – Gulf Coast Research Laboratory Museum, Ocean Springs, USA

**GEA** – Laboratório de Ictiologia do Grupo de Ecologia Aquática, Universidade Federal do Pará, Belém, Brazil

**GVF** – George Vanderbilt Foundation, Stanford, USA [Specimens now at California Academy of Science]

**HUJ** – The Hebrew University of Jerusalem, Jerusalem, Israel

**HUMZ** – Hokkaido University Museum, Sapporo, Japan

**HVM** – Heda Village Museum, Heda, Shizuoka, Japan

**IC-MBP** – Marine Biology Station, National Institute of Biology, Piran, Slovenia

**IFAN** - Institut Fondamental d’Afrique noire Cheikh Anta Diop de Dakar, Senegal

**IFREDI-PO** – Inland Fisheries Research and Development Institute, Phnom Penh, Cambodia

**INHS** – Illinois Natural History Survey, University of Illinois at Urbana-Champaign, Champaign

**INPA** – Instituto Nacional de Pesquisas da Amazônia, Manaus, Brazil

**INVEMAR** – Instituto de Investigaciones Marinas y Costeras "José Benito Vives de Andrés", Museo de Historia Natural Marina de Colombia (MHNMC), Rodadero Sur, Santa Marta, Colombia

**IPPS** – Institut Penyelidikan Perikanan Sarawak [Fisheries Research Institute Sarawak (FRIS)], Kuching, Malaysia

**IRDN** – Institut de recherche pour le développement (IRD), Nouméa, New Caledonia

**IVPP** – Institute of Vertebrate Paleontology and Paleoanthropology, Chinese Academy of Sciences [Academia Sinica], Beijing, China

**JNC** – Unclear, may pertain to specimens in MNHN Paris

**JNU** – Fish Genetics and Breeding Laboratory, Jeju National University, Jeju City, Korea

**KA** – University of Canterbury, Edward Percival Field Centre, Kaikoura, New Zealand

**KAU** – King Abdulaziz University Marine Museum, Jeddah, Saudi Arabia

**KAUM** – Kagoshima University Museum, Kagoshima, Japan

**KBF-I** – Kuroshio Biological Research Foundation, Kochi, Japan

**KPM-NI** – Kanagawa Prefectural Museum of Natural History, Odawara. Includes: fishes from Izu Oceanic Park (IOP, IOPM), Ito, Shizuoka, Japan

**LACM** – Los Angeles County Museum of Natural History, Los Angeles, California, USA

**LBP** – Laboratório de Biologia e Genética de Peixes (LBGP), Departamento de Morfologia, Universidade Estadual Paulista "Júlio de Mesquita Filho" (UNESP), Campus de Botucatu

**LGE-P** – Laboratório de Genética de Peixes, Departamento de Biologia, Instituto de Biociências, Universidade Estadual Paulista "Júlio de Mesquita Filho" UNESP, Campus de Rio Claro, Brazil

**LJVC** – L. J. V. Compagno personal collection

**MBUCV** – Museo de Biología de la Universidad Central de Venezuela, Caracas, Venezuela

**MCP** – Museu de Ciências e Tecnologia (MCT), Pontifícia Universidade Católica do Rio Grande do Sul (PUCRS), Porto Alegre, Rio Grande do Sul, Brazil

**MCZ** – Museum of Comparative Zoology, Harvard University, Cambridge, USA

**MEPN** – Museo de Historia Natural "Gustavo Orcés V.", Instituto de Ciencias Biológicas, Escuela Politécnica Nacional, Quito

**MEUFC** – Museum of the Systematics, Faculty of Fisheries, Mersin University, Mersin, Turkey

**MHNUSC** – Museo de Historia Natural da Universidade de Santiago de Compostela, Santiago de Compostela

**MNHM** – Musée d'Histoire Naturelle de Miguasha, Quebec, Canada

**MNHN** – Muséum national d'Histoire naturelle, Paris, France

**MNHNC** – Museo Nacional de Historia Natural, Santiago. Includes: fish collections from the Universidad de Chile, Santiago, Chile

**MNRJ** – Museu Nacional, Universidade Federal do Rio de Janeiro, Rio de Janeiro, Brazil

**MPEG** – Museu Paraense "Emílio Goeldi", Belém, Brazil

**RCMA (MRAC)** – Royal Museum for Central Africa [Musée royal de l'Afrique centrale (MRAC), Koninklijk Museum voor Midden-Afrika (KMMA)], Tervuren, Belgium

**MSCB** – Marine Science Center, University of Basra, Basra, Iraq

**MSL** – Marine Sciences Laboratory, Agriculture Faculty at Tishreen University, Latakia, Syria

**MSNC** – Museo di Storia Naturale di Comiso, Comiso, Italy

**MUFS** – Division of Fisheries Science, University of Miyazaki, Miyazaki, Japan

**MUSM** – Museo de Historia Natural, Universidad Nacional Mayor de San Marcos, Lima, Peru

**MZB** – Bidang Zoologi, Pusat Penelitian Biologi, Lembaga Ilmu Pengetahuan Indonesia (LIPI), Cibinong, Bogor Regency, Indonesia

**MZL** – Musée Cantonal de Zoologie, Lausanne, Switzerland

**MZUSP** – Museu de Zoologia da Universidade de São Paulo, São Paulo, Brazil

#### **NBFGR/PP**

**NHMUK** – Natural History Museum (London), London, United Kingdom

**NIBR** – National Institute of Biological Resources, Korean Ministry of the Environment, Incheon, South Korea

**NMMB-P** – National Museum of Marine Biology, Pingtung, Taiwan

**NMNHS** – National Museum of Natural History, Bulgarian Academy of Sciences, Sofia, Bulgaria

**NMNZ** – Museum of New Zealand Te Papa Tongarewa, Wellington, New Zealand

**NMS** – National Museum of Scotland, Edinburgh, Scotland, United Kingdom

**NMST-P** – National Science Museum, Department of Zoology, Tokyo, Japan

**NMV** – Museums Victoria, Melbourne, Australia

**NMW** – Naturhistorisches Museum, Wien [Vienna], Austria

**NRM** – Naturhistoriska riksmuseet [Swedish Museum of Natural History], Departments of Zoology and Paleontology, Stockholm, Sweden

**NSMT** – National Museum of Nature and Science, Zoology Department, Division of Fishes, Tsukuba, Ibaraki, Japan

**NTM S** – Museum and Art Gallery of the Northern Territory, Darwin, Australia

**NMW** – Naturhistorisches Museum, Vienna, Austria

**OMNH-P** – Osaka Museum of Natural History, Osaka, Japan

**ORID** – Oceanographic Research Institute, South African Association for Marine Biological Research (SAAMBR), Durban, South Africa

**OSUM** – Ohio State University Museum of Biological Diversity, Columbus, Ohio, USA

**PIMUZ** – Paläontologisches Institut und Museum der Universität Zürich, Zürich, Switzerland

**PKU** – Pukyong National University, Department of Marine Biology, Busan, South Korea

**PMBC** – Phuket Marine Biological Centre, Phuket, Thailand

**PSUZC** – Princess Maha Chakri Sirindhorn Natural History Museum, Prince of Songkla University in Hat Yai, Songkhla, Thailand

**PU/B92N** – Museum of Department of Ocean Studies and Marine Biology, Pondicherry University, Port Blair Campus, Andaman Islands

**PUMB** – Museum of Department of Ocean Studies and Marine Biology, Pondicherry University, Port Blair Campus, Andaman Islands

**RMNH** – Rijksmuseum van Natuurlijke Historie, Leiden, Netherlands

**ROM** – Royal Ontario Museum, Toronto, Ontario

**RUSI/SAIAB** – South African Institute for Aquatic Biodiversity, Makhanda [Grahamstown], South Africa

**SAM** – South African Museum, Cape Town, South Africa

**SCUM** – Sichuan University Museum, Chengdu, China

**SFRI** – Institut Penyelidikan Perikanan Sarawak/Sarawak Fisheries Research Institute, Kuching, Malaysia

**SG** – S. H. Gruber personal collection

**SIO** – Scripps Institution of Oceanography, La Jolla, USA

**SM** – *Shoyo Maryu* field number

**SMBL-F** – Seto Marine Biological Laboratory of Kyoto University, Shirahama, Japan

**SMF** – Senckenberg Forschungsinstitut und Naturmuseum [Senckenberg Research Institute and Natural History Museum], Frankfurt am Main, Germany

**SMNK** – Staatliches Museum für Naturkunde Karlsruhe [Karlsruher Naturkundemuseum], Karlsruhe, Germany

**SNM** – Slovak National Museum [Slovenské národné múzeum], Natural Science Museum, Bratislava, Slovakia

**STRI** – Smithsonian Tropical Research Institute, Balboa, Panamá

**TAMAR** – Projeto Tamar, São João da Mata, Brazil

**TAMBL** – Toba Aquarium, Toba, Japan

**TAU** – Tel Aviv University, Tel Aviv, Israel

**TCWC** – Biodiversity Research and Teaching Collections (BRTC), Department of Wildlife and Fisheries Sciences, Texas A&M University, College Station, USA

**TMFE** – Elasmobranchii Collection, Department of Fisheries, Faculty of Marine Science and Technology, Tokai University, Shimizu, Shizuoka, Japan

**TU** – Tulane University, New Orleans, USA

**UCR** – Museo de Zoología, Escuela de Biología, Universidad de Costa Rica, Costa Rica

**UF** – Florida Museum of Natural History, Gainesville, Florida, USA

**UFBA** – Museu de Zoologia da Universidade Federal da Bahia, Salvador, Brazil

**UFRO** – Universidade Federal de Rondônia, Porto Velho, Brazil

**UMCZ** – University Museum of Zoology, University of Cambridge, Cambridge, United Kingdom

**UMML** – University of Miami Institute of Marine Science, Miami, USA

**UMMZ** – University of Michigan Museum of Zoology, Ann Arbor, USA

**UNC** – University of North Carolina at Chapel Hill, Institute of Marine Sciences, Morehead City  
Note: these specimens now in the collections at the North Carolina Museum of Natural Sciences (NCSM), but the revised specimen numbers are unknown.

**UNPSJB** - Universidad Nacional de la Patagonia San Juan Bosco, Chubut Province, Argentina

**UNS** – University of Science, Hồ Chí Minh City, Vietnam

**URM-P** – Yoshino collection from the University of the Ryukyus, currently at Okinawa Churashima Foundation Research Center, Kunigami, Japan

**USNM** – Smithsonian National Museum of Natural History, Washington D.C., USA

**UWBM** – Burke Museum of Natural and Science, Seattle, USA

**WAM** – Western Australian Museum, Perth, Australia

**YCM** – Yokosuka City Museum, Yokosuka, Japan

**ZMB** - Museum für Naturkunde, Berlin, Germany

**ZMH** – Centrum für Naturkunde (CeNak), Zoologisches Museum, Universität Hamburg, Hamburg, Germany

**ZMUB** - Bergen Museum, University of Bergen, Bergen, Norway

**ZRC** – Zoological Reference Collection, Lee Kong Chian Natural History Museum, Singapore

**ZSI** – Zoological Survey of India, Indian Museum, Kolkata, India

**ZSI/ANRC** – Zoological Survey of India, Port Blair, India

**ZSI/CLT** – Zoological Survey of India, Kozhikode, India

**ZSM** – Bavarian State Collections of Zoology, Munich, Germany

**ZUMT** – The University Museum, University of Tokyo, Tokyo, Japan

**ZVC** – Zoological Vertebrate Collection-Peces, Museum of Natural History, Montevideo, Uruguay

Every effort has been made to list the abbreviations used here, however given the large size of the dataset and the fact that many of these data come from the previously published literature rather than measured in person means that some may have slipped through the cracks. All specimens for which data was measured directly by the author have their specimen numbers listed. In the event that a specimen number is accidentally not listed here, please consult Sabaj [669] for a comprehensive list of institutional abbreviations in ichthyology.

Sabaj, M.H. Codes for Natural History Collections in Ichthyology and Herpetology. *Copeia* **2020**, *108*, 593-669, doi:10.1643/ASIHCONDONS2020.

## Petromyzontiformes

- Baker, C.F.; Rossi, C.R.; Quiroga, P.; White, E.; Williams, P.; Kitson, J.; Bice, C.M.; Renaud, C.B.; Potter, I.; Neira, F.J.; et al. Morphometric and physical characteristics distinguishing adult Patagonian lamprey, *Geotria macrostoma* from the pouched lamprey, *Geotria australis*. *PLOS ONE* **2021**, *16*, e0250601, doi:10.1371/journal.pone.0250601.
- Beamish, R.J. *Lampetra macrostoma*, a New Species of Freshwater Parasitic Lamprey from the West Coast of Canada. *Can J For Res* **1982**, *39*, 736-747, doi:10.1139/f82-102.
- Branson, B.A. Measurements, Counts, and Observations on Four Lamprey Species from Kentucky (*Ichthyomyzon*, *Lampetra* and *Entosphenus*). *The American Midland Naturalist* **1970**, *84*, 243-247, doi:10.2307/2423741.
- Çevik, C.; Ergüden, D.; Tekelioğlu, N. Confirmation of the presence of the Sea Lamprey, *Petromyzon marinus* Linnaeus, 1758 in the Levantine Sea (Petromyzoniformes: Petromyzonidae). *Zoology in the Middle East* **2010**, *49*, 107-108, doi:10.1080/09397140.2010.10638398.
- Economidis, P.S.; Kallianiotis, A.; Psaltopoulou, H. Two records of sea lamprey from the north Aegean Sea. *Journal of Fish Biology* **1999**, *55*, 1114-1118, doi: jfbi.1999.1021.
- Holčík, J.; Delić, A.; Kučinić, M.; Bukvić, V.; Vater, M. Distribution and morphology of the sea lamprey from the Balkan coast of the Adriatic Sea. *Journal of Fish Biology* **2004**, *64*, 514-527, doi:https://doi.org/10.1111/j.0022-1112.2004.00318.x.
- Rafrafi-Nouira, S.; El Kamel-Moutalibi, O.; Boumaïza, M.; Reynaud, C.; Capapé, C. On the occurrence of sea lamprey *Petromyzon marinus* (Agnatha: Petromyzonidae) in Tunisian waters (central Mediterranean Sea). *Cahiers de Biologie Marine* **2015**, *56*, 73-76.

## Placodermi/Arthrodira

### *Africanaspis*

Gess, R.W.; Trinajstić, K.M. New morphological information on, and species of placoderm fish *Africanaspis* (Arthrodira, Placodermi) from the Late Devonian of South Africa. *PLoS ONE* **2017**, *12*, e0173169, doi:10.1371/journal.pone.0173169.

### *Coccosteus*

Miles, R.S.; Westoll, T.S. The Placoderm Fish *Coccosteus cuspidatus* Miller ex Agassiz from the Middle Old Red Sandstone of Scotland. Part I. Descriptive Morphology. *Transactions of the Royal Society of Edinburgh* **1968**, *67*, 373-476, doi:10.1017/S0080456800024078.

### *Dunkleosteus*

Branson, E.B. Notes on *Dinichthys terrelli* Newberry, with a restoration. *The Ohio Naturalist* **1908**, *8*, 363-369.

Branson, E.B. Notes on the Ohio Shales and their faunas. *The University of Missouri Bulletin Science Series* **1911**, *2*, 23-32.

Carr, R.K.; Lelièvre, H.; Jackson, G.L. The ancestral morphotype for the gnathostome pectoral fin revisited and the placoderm condition. In *Morphology, Phylogeny and Paleobiogeography of Fossil Fishes*, Elliott, D.K., Maisey, J.G., Yu, X., Miao, D., Eds.; Verlag Dr. Friedrich Pfeil: München, 2010; pp. 107-122.

Johanson, Z.; Trinajstić, K.; Cumbaa, S.; Ryan, M.J. Fusion in the vertebral column of the pachyosteomorph arthrodire *Dunkleosteus terrelli* ('Placodermi'). *Palaeontol. Electron.* **2019**, *22.2.20A*, doi:10.26879/872.

### Gogo Formation Arthrodira

Dennis, K.; Miles, R.S. Eubrachythoracid arthrodira with tubular rostral plates from Gogo, Western Australia. *Zool J Linn Soc* **1979**, *67*, 297-328, doi:10.1111/j.1096-3642.1979.tb01118.x.

Dennis, K.; Miles, R.S. A pachyosteomorph arthrodire from Gogo, Western Australia. *Zool J Linn Soc* **1981**, *73*, 213-258, doi:10.1111/j.1096-3642.1981.tb01594.x.

Gardiner, B.G.; Miles, R.S. A new genus of eubrachythoracid arthrodire from Gogo, Western Australia. *Zool J Linn Soc* **1990**, *99*, 159-204, doi:10.1111/j.1096-3642.1990.tb00566.x.

Gardiner, B.G.; Miles, R.S. Eubrachythoracid arthrodira from Gogo, Western Australia. *Zool J Linn Soc* **1994**, *112*, 443-477, doi:10.1111/j.1096-3642.1994.tb00331.x.

Long, J. A new camuropiscid arthrodire (Pisces: Placodermi) from Gogo, Western Australia. *Zool J Linn Soc* **1988**, *94*, 233-258, doi:10.1111/j.1096-3642.1988.tb01194.x.

Long, J. A second incisoscutid arthrodire (Pisces, Placodermi) from the Late Devonian Gogo Formation, Western Australia). *Alcheringa* **1994**, *18*, 59-69.

Long, J.A. A new plourdosteid arthrodire from the Upper Devonian Gogo Formation of Western Australia. *Palaeontology* **1995**, *38*, 39-62.

Miles, R.S.; Dennis, K. A primitive eubrachythoracid arthrodire from Gogo, Western Australia. *Zool J Linn Soc* **1979**, *66*, 31-62, doi:10.1111/j.1096-3642.1979.tb01900.x.

Miles, R.S.; White, E.I. The Holonematidae (placoderm fishes), a review based on new specimens of *Holonema* from the Upper Devonian of Western Australia. *Philosophical Transactions of the Royal Society of London. B, Biological Sciences* **1971**, *263*, 101-234, doi:10.1098/rstb.1971.0111.

Trinajstić, K. New anatomical information on *Holonema* (Placodermi) based on material from the Frasnian Gogo Formation and the Givetian-Frasnian Gneudna Formation, Western Australia. *Geodiversitas* **1999**, *21*, 69-84.



Trinajstić, K.; Hazelton, M. Ontogeny, phenotypic variation and phylogenetic implications of arthrodires from the Gogo Formation, Western Australia. *J Vertebr Paleontol* **2007**, *27*, 571-583, doi:10.1671/0272-4634(2007)27[571:OPVAPI]2.0.CO;2.

Trinajstić, K.; Sanchez, S.; Dupret, V.; Tafforeau, P.; Long, J.; Young, G.; Senden, T.; Boisvert, C.; Power, N.; Ahlberg, P.E. Fossil musculature of the most primitive jawed vertebrates. *Science* **2013**, *341*, 160-164, doi:10.1126/science.1237275.

### ***Heintzichthys***

Heintz, A. A reconstruction of *Stenognathus gouldi*. *Annals and Magazine of Natural History* **1931**, *8*, 242-249.

### **Other Taxa**

Boyle, J.; Ryan, M.J. New information on *Titanichthys* (Placodermi, Arthrodira) from the Cleveland Shale (Upper Devonian) of Ohio, USA. *J Paleontol* **2017**, *91*, 318-336, doi:10.1017/jpa.2016.136.

Carr, R.K. A redescription of *Gymnotrachelus* (Placodermi: Arthrodira) from the Cleveland Shale (Famennian) of northern Ohio, U.S.A. *Kirtlandia* **1994**, *48*, 3-21.

Dean, B. Notes on a newly mounted *Titanichthys*. *Mem Am Mus Nat Hist* **1909**, *9*, 270-271.

Dunkle, D.H.; Bungart, P.A. On one of the least known of the Cleveland Shale Arthrodira. *Kirtlandia* **1940**, *8*, 29-47.

Gross, W. Die Arthrodira Wildungens. *Geologische und Paläontologische Abhandlungen* **1932**, *19*, 1-61.

Hussakof, L.; Bryant, W.L. Catalog of the fossil fishes in the museum of the Buffalo society of natural sciences. *Bulletin of the Buffalo Society of Natural Sciences* **1918**, *12*, 1-198.

## **Actinopterygii**

### **Basal Actinopterygii**

#### *Acipenseriformes*

Colway, C.; Stevenson, D.E. Confirmed Records of Two Green Sturgeon from the Bering Sea and Gulf of Alaska. *Northwestern Naturalist* **2007**, *88*, 188-192, doi:10.1898/1051-1733(2007)88[188:Crotgs]2.0.Co;2.

Hata, H.; Yamada, M.; Motomura, H. Morphological and ecological notes on *Acipenser sinensis* (Chondrostei: Acipenseriformes) in Kagoshima Prefecture, Japan. *Nature of Kagoshima* **2018**, *44*, 157-161.

Honma, Y.; Itano, H. A Record of a Great Siberian Sturgeon, *Huso dauricus*, off Niigata, Sea of Japan (Osteichthyes: Acipenseridae). *Japanese Journal of Ichthyology* **1994**, *41*, 317-321.

Kalmykov, V.A.; Ruban, G.I.; Pavlov, D.S. On the populational structure of sterlet *Acipenser ruthenus* (Acipenseridae) from the Volga Lower reaches. *Journal of Ichthyology* **2009**, *49*, 339-347, doi:10.1134/s0032945209040067.

Mikodina, E.V.; Novosadov, A.G.; Koshelev, V.N. On biology of Kaluga sturgeon *Acipenser dauricus* (Acipenseridae) from the Viakhtu River (Northwestern Sakhalin). *Journal of Ichthyology* **2015**, *55*, 567-575, doi:10.1134/s0032945215040062.

Ting, H.-p. Notes on a Sturgeon from the Min River, China. *Copeia* **1949**, *1949*, 65-68, doi:10.2307/1437665.

Williams, J.D.; Clemmer, G.H. *Scaphirhynchus suttkusi*, a new sturgeon (Pisces: Acipenseridae) from the Mobile Basin of Alabama and Mississippi. *Bulletin of the Alabama Museum of Natural History* **1991**, 17-31.

### *Lepisosteiformes*

McDonald, D.L.; Anderson, J.D.; Hurley, C.; Bumguardner, B.W. Sexual Dimorphism in Alligator Gar. *North American Journal of Fisheries Management* **2013**, *33*, 811–816, doi:10.1080/02755947.2013.812586.

Snow, R.A.; Porta, M.J.; Sager, C.R. Length-Weight Relationships and Potential Biases for Alligator Gar (*Atractosteus spatula*) from Texoma Reservoir, Oklahoma. *Proceedings of the Oklahoma Academy of Science* **2020**, *100*, 30-37.

### *Polypteriformes*

Hanssens, M.M.; Teugels, G.G.; Dirk, F.E.T.v.D.A. Subspecies in the *Polypterus palmas* Complex (Brachiopterygii: Polypteridae) from West and Central Africa. *Copeia* **1995**, *1995*, 694–705, doi:10.2307/1446767.

Schliewen, U.K.; Schäfer, F. *Polypterus mokelembembe*, a new species of bichir from the central Congo River basin (Actinopterygii: Cladistia: Polypteridae). *Zootaxa* **2006**, *1129*, doi:10.11646/zootaxa.1129.1.2.

## Basal Teleostei

### *Albuliformes*

#### **Albulidae**

Randall, J.E. Randall's tank photos. Collection of 10,000 large-format photos (slides) of dead fishes. Available online: [www.fishbase.org](http://www.fishbase.org) (see species pages for more details) (accessed on June 29).

### *Anguilliformes*

Hatooka, K.; Randall, J.E. A new moray eel (*Gymnothorax*: Muraenidae) from Japan and Hawaii. *Japanese Journal of Ichthyology* **1992**, *39*, 183-190.

Li, Y.; Zhang, L.; Zhao, L.; Feng, J.; Loh, K.; Zheng, X.; Lin, L. New identification of the moray eel *Gymnothorax minor* (Temminck & Schlegel, 1846) in China (Anguilliformes, Muraenidae). *Zookeys* **2018**, *149*-161, doi:10.3897/zookeys.752.24231.

Loh, K.-H.; Hussein, M.A.S.; Chong, V.-C.; Sasekumar, A. Notes on the moray eels (Anguilliformes: Muraenidae) of Malaysia with two new records. *Sains Malaysiana* **2015**, *44*, 41-47.

Rafrafi-Nouira, S.; Souissi, J.B.; Capapé, C. About teleost species from deep marine Tunisian waters: with additional records of Sloane's viperfish *Chauliodus sloani* and confirmed occurrence of blackfin sorcerer *Nettastoma melanurum*. *Annales, Series historia naturalis* **2018**, *28*, 51–58, doi:10.19233/ASHN.2018.08.

Yagi, M.; Shimoda, M.; Uchida, J.; Shimizu, K.; Aoshima, T.; Kanehara, H. Record body size of the beach conger *Conger japonicus* (Anguilliformes: Congridae) in the East China Sea. *Marine Biodiversity Records* **2013**, *6*, e110, doi:10.1017/S1755267213000882.

### *Elopiformes*

#### **Elopidae**

Bovcon, N.D.; Cochia, P.D.; Trobbiani, G.A.; Belleggia, M.; Jacobi, K.J.; De Wysiecki, A.M.; Figueroa, D.E.; Irigoyen, A.J. Southernmost record of *Elops smithi* in the Southwest Atlantic. A tropical species in waters of Patagonia, Argentina. *Journal of Applied Ichthyology* **2022**, *38*, 320-324, doi:10.1111/jai.14299.

McBride, R.S.; Rocha, C.R.; Ruiz-Carus, R.; Bowen, B.W. A new species of ladyfish, of the genus *Elops* (Elopiformes: Elopidae), from the western Atlantic Ocean. *Zootaxa* **2010**, *2346*, 29-41.

## Megalopidae

- Arronte, J.C.; Pis-Millán, J.A.; Fernández, M.P.; García, L. First records of the subtropical fish *Megalops atlanticus* (Osteichthyes: Megalopidae) in the Cantabrian Sea, northern Spain. *Journal of the Marine Biological Association of the United Kingdom* **2004**, *84*, 1091-1092, doi:10.1017/S0025315404010501h.
- Bañón, R.; Farias, C.; De Carlos, A.; Arronte, J.C.; Varela, J.L.; Arias, A.; Barros-Garcia, D.; Gonzalez-Ortegon, E. New record and revised list of *Megalops atlanticus* (Elopiformes: Megalopidae) from Atlantic European waters. *Cybium* **2019**, *43*, 203–207.
- Dolganov, V.N.; Kharin, V.E.; Zemnukhov, V.V. The Megalopidae, a new family of fishes for fauna of Russia. *Journal of Ichthyology* **2008**, *48*, 275, doi:10.1134/S0032945208030107.
- Roux, C. Note sur le Tarpon [*Megalops atlanticus* C. et V.] des côtes de la République du Congo. *Bulletin du Muséum national d'histoire naturelle* **1960**, *32*, 314-319.
- Twomey, E.; Byrne, P. A new record for the tarpon, *Tarpon atlanticus* Valenciennes (Osteichthyes-Elopiformes-Elopidae), in the eastern North Atlantic. *Journal of Fish Biology* **1985**, *26*, 359–362.

## Osteoglossiformes

### Mormyridae

Monarch. Fish specimens housed at the California Academy of Sciences uploaded to Monarch. Available online: <http://monarch.calacademy.org/index.php> (accessed on July 24).

### Osteoglossidae

- Leal, M.E.C.; De Sant-Anna, V.B. Quantitative analysis of interspecific and ontogenetic variation in *Osteoglossum* species (Teleostei: Osteoglossiformes: Osteoglossidae). *Zootaxa* **2006**, *1239*, 49–68, doi:10.11646/zootaxa.1239.1.4.
- Pouyaud, L.; Sudarto, T.G.; Teugels, G. The different colour varieties of the Asian arowana *Scleropages formosus* (Osteoglossidae) are distinct species: morphologic and genetic evidences. *Cybium* **2003**, *27*, 287–305.
- Scadeng, M.; McKenzie, C.; He, W.; Bartsch, H.; Dubowitz, D.J.; Stec, D.; St. Leger, J. Morphology of the Amazonian Teleost Genus *Arapaima* Using Advanced 3D Imaging. *Frontiers in Physiology* **2020**, *11*, 260.
- Stewart, D.J. A New Species of *Arapaima* (Osteoglossomorpha: Osteoglossidae) from the Solimões River, Amazonas State, Brazil. *Copeia* **2013**, *2013*, 470-476, doi:10.1643/ci-12-017.

## Ostariophysi

### Alepocephaliformes

- Fujiwara, Y.; Kawato, M.; Poulsen, J.Y.; Ida, H.; Chikaraishi, Y.; Ohkouchi, N.; Oguri, K.; Gotoh, S.; Ozawa, G.; Tanaka, S.; et al. Discovery of a colossal slickhead (Alepocephaliformes: Alepocephalidae): an active-swimming top predator in the deep waters of Suruga Bay, Japan. *Scientific Reports* **2021**, *11*, 2490, doi:10.1038/s41598-020-80203-6.
- Goode, G.B.; Bean, T.H. Description of *Alepocephalus bairdii*, a new species of fish from the deep sea fauna of the western Atlantic. *Proceedings of the United States National Museum* **1879**, *2*, 55-57.

## Characiformes

### Acestrorhynchidae

Einhardt, M.D.S.; Corrêa, F.; Cavaleiro, A.C.M.; Piedras, S.; Pouey, J. New area of occurrence to *Acestrorhynchus pantaneiro* (Menezes, 1992) (Characiformes, Acestrorhynchidae) in the Chasqueiro Stream Basin, Patos-Mirim system, Rio Grande do Sul, Brazil. *Boletín de la Sociedad Zoológica del Uruguay* **2014**, *23*, 36-42. **Alestidae**

Ahmed, E.Y.; Hamid, M.M.; Mahmoud, Z.N.; Hagar, E.S.A.; Masri, M.A. Meristic, morphological and genetic identification of the fish *Brycinus nurse* (Alestidae) from Sinnar, Blue Nile. *International Journal of Fisheries and Aquatic Studies* **2020**, *8*, 373–376.

Brewster, B. A review of the genus *Hydrocynus* Cuvier 1819 (Teleostei, Characiformes). *Bulletin of the British Museum (Natural History)* **1986**, *50*, 163-206.

Monarch. Fish specimens housed at the California Academy of Sciences uploaded to Monarch. Available online: <http://monarch.calacademy.org/index.php> (accessed on July 24). **Anostomidae**

Birindelli, J.L.O.; Peixoto, L.A.W.; Wosiacki, W.B.; Britski, H.A. New Species of *Hypomasticus* Borodin, 1929 (Characiformes: Anostomidae) from Tributaries of the Lower Rio Amazonas, Brazil. *Copeia* **2013**, *2013*, 464-469, doi:10.1643/ci-12-148.

### Characidae

Benine, R.C.; Melo, B.F.; Castro, R.M.; Oliveira, C. Taxonomic revision and molecular phylogeny of *Gymnocorymbus* Eigenmann, 1908 (Teleostei, Characiformes, Characidae). *Zootaxa* **2015**, *3956*, 1-28, doi:10.11646/zootaxa.3956.1.1.

Bertaco, V.A.; Malabarba, L.R. A review of the Cis-Andean species of *Hemibrycon* Günther (Teleostei: Characiformes: Characidae: Stevardiinae), with description of two new species. *Neotropical Ichthyology* **2010**, *8*, 737–770, doi:10.1590/s1679-62252010000400005.

Camelier, P.; Dagosta, F.C.P.; Marinho, M.M.F. New remarkable sexually dimorphic miniature species of *Hyphessobrycon* (Characiformes: Characidae) from the upper Rio Tapajos basin. *Journal of Fish Biology* **2018**, *92*, 1149-1162, doi:10.1111/jfb.13579.

dos Santos, M.R.; Renesto, E. Genetic variability in *Oligosarcus paranensis* (Teleostei: Characiformes) from the São Francisco river, Ivaí river basin – Paraná State, Brazil. *Acta Scientiarum. Biological Sciences* **2013**, *35*, doi:10.4025/actasciobiolsci.v35i3.14179.

Fuster de Plaza, M.L. Una contribución al conocimiento del dorado (*Salminus maxillosus* Cuv. y Val.). *Revista del Museo de La Plata* **1950**, *6*, 172–214.

Lima, F.C.T.; Britski, H.A. *Salminus franciscanus*, a new species from the rio São Francisco basin, Brazil (Ostariophysi: Characiformes: Characidae). *Neotropical Ichthyology* **2007**, *5*, 237-244, doi:10.1590/s1679-62252007000300001.

Mattox, G.M.T.; Conway, K.W. Osteology of *Tucanoichthys tucano* Géry and Römer, an enigmatic miniature fish from the Amazon basin, Brazil (Teleostei: Characiformes: Characidae). *Vertebrate Zoology* **2021**, *71*, 645-667, doi:10.3897/vz.71.e71886.

Mendonça, M.B.; Peixoto, L.A.W.; Dutra, G.M.; Netto-Ferreira, A.L. A new miniature of Xenrobryconini (Characiformes: Characidae) from the rio Tapajós basin, Brazil. *Neotropical Ichthyology* **2016**, *14*, doi:10.1590/1982-0224-20150057.

Menezes, N.A. A new species of *Cynopotamus* Valenciennes, 1849 (Characiformes, Characidae) with a key to the species of the genus. *Zootaxa* **2007**, *1635*, 55-61, doi:10.11646/zootaxa.1635.1.4.

Menezes, N.A.; Ribeiro, A.C. *Oligosarcus jacuiensis* (Characiformes: Characidae), a new species from the Uruguay and Jacuí River basins, southern Brazil. *Neotropical Ichthyology* **2010**, *8*, 649-653, doi:10.1590/s1679-62252010000300010.

Pinho, S.M.; David, L.H.; Garcia, F.; Keesman, K.J.; Portella, M.C.; Goddek, S. South American fish species suitable for aquaponics: a review. *Aquaculture International* **2021**, *29*, 1427–1449, doi:10.1007/s10499-021-00674-w.

### Cynodontidae

Brewster, B. A review of the genus *Hydrocynus* Cuvier 1819 (Teleostei, Characiformes). *Bulletin of the British Museum (Natural History)* **1986**, *50*, 163–206.

Toledo-Piza, M.; Menezes, N.A.; Mendes dos Santos, G. Revision of the neotropical fish genus *Hydrolycus* (Ostariophysi: Cynodontinae) with the description of two new species. *Ichthyological Exploration of Freshwaters* **1999**, *10*, 255–280.

### Hepsetidae

Decru, E.; Vreven, E.; Snoeks, J. A revision of the West African *Hepsetus* (Characiformes: Hepsetidae) with a description of *Hepsetus akawo* sp. nov. and a redescription of *Hepsetus odoe* (Bloch, 1794). *Journal of Natural History* **2012**, *46*, 1–23, doi:10.1080/00222933.2011.622055.

### Iguanodectidae

Silva-Oliveira, C.; Moreira, C.R.; Lima, F.C.T.; Py-Daniel, L.R. The true identity of *Bryconops cyrtogaster* (Norman), and description of a new species of *Bryconops* Kner (Characiformes: Iguanodectidae) from the Rio Jari, lower Amazon basin. *Journal of Fish Biology* **2020**, *97*, 860–868, doi:10.1111/jfb.14445.

### Serrasalmidae

Andrade, M.C.; Sousa, L.M.; Ota, R.P.; Jégu, M.; Giarrizzo, T. Redescription and Geographical Distribution of the Endangered Fish *Ossubtus xinguense* Jégu 1992 (Characiformes, Serrasalmidae) with Comments on Conservation of the Rheophilic Fauna of the Xingu River. *PLOS ONE* **2016**, *11*, e0161398, doi:10.1371/journal.pone.0161398.

Bonani Mateussi, N.T.; Melo, B.F.; Oliveira, C. Molecular delimitation and taxonomic revision of the wimple piranha *Catoprion* (Characiformes: Serrasalmidae) with the description of a new species. *Journal of Fish Biology* **2020**, *97*, 668–685, doi:10.1111/jfb.14417.

Deprá, G.C.; Oliveira, A.G.; Silva, A.B.; Frota, A.; Proença, H.C.; Message, H.J.; dos Reis, R.B.; Ota, R.R. A New Potential Invader: First Record of the Pirambeca *Serrasalmus geryi* (Characiformes: Serrasalmidae) in the upper Paraná River floodplain, Brazil. *Journal of Ichthyology* **2021**, *61*, 190–195, doi:10.1134/s0032945221020041.

Escobar, L.M.; Ota, R.P.; Machado-Allison, A.; Andrade-Lopez, J.; Farias, I.P.; Hrbek, T. A new species of *Piaractus* (Characiformes: Serrasalmidae) from the Orinoco Basin with a redescription of *Piaractus brachypomus*. *Journal of Fish Biology* **2019**, *95*, 411–427, doi:10.1111/jfb.13990.

Fink, W.L. Revision of the Piranha Genus *Pygocentrus* (Teleostei, Characiformes). *Copeia* **1993**, *1993*, 665–687, doi:10.2307/1447228.

Gómez, S.E.; Bentos, C.A.; Ramirez, J.L. Humans attacked by piranhas (Pisces: Serrasalmidae) in Buenos Aires Province, Argentina. *Aqua, Journal of Ichthyology and Aquatic Biology* **2004**, *9*, 25–28.

Hilsdorf, A.W.S.; Uliano-Silva, M.; Coutinho, L.L.; Montenegro, H.; Almeida-Val, V.M.F.; Pinhal, D. Genome assembly and annotation of the tambaqui (*Colossoma macropomum*): an emblematic fish of the Amazon River Basin. *Gigabyte* **2021**, *2021*, 1–14, doi:10.46471/gigabyte.29.

Nakayama, C.M.; Feldberg, E.; Bertollo, L.A.C. Karyotype differentiation and cytotoxic considerations in species of Serrasalmidae (Characiformes) from the Amazon basin. *Neotropical Ichthyology* **2012**, *10*, 53–58, doi:10.1590/s1679-62252012000100005.

- Ota, R.P.; Machado, V.N.; Andrade, M.C.; Collins, R.A.; Farias, I.P.; Hrbek, T. Integrative taxonomy reveals a new species of pacu (Characiformes: Serrasalminae: *Myloplus*) from the Brazilian Amazon. *Neotropical Ichthyology* **2020**, *18*, doi:10.1590/1982-0224-20190112.
- Ota, R.P.; Py-Daniel, L.H.R.; Jégu, M. A new Silver Dollar species of *Metynnis* Cope, 1878 (Characiformes: Serrasalminae) from Northwestern Brazil and Southern Venezuela. *Neotropical Ichthyology* **2016**, *14*, doi:10.1590/1982-0224-20160023.
- Ruiz-Carus, R.; Davis, S.B. Register of an exceptionally large redbellied pacu, *Piaractus brachipomus* (Teleostei, Characidae) in east-central Florida, with gonad and diet analyses. *Florida Scientist* **2003**, *66*, 184–188.

## *Clupeiformes*

### **Cheirocentridae**

- Monarch. Fish specimens housed at the California Academy of Sciences uploaded to Monarch. Available online: <http://monarch.calacademy.org/index.php> (accessed on July 24).
- Randall, J.E. Randall's tank photos. Collection of 10,000 large-format photos (slides) of dead fishes. Available online: [www.fishbase.org](http://www.fishbase.org) (see species pages for more details) (accessed on June 29).

### **Clupeidae**

- Bañón, R.; Punzón, A.; Barros-García, D.; De Carlos, A. Range extension of the Atlantic herring *Clupea harengus* (Clupeiformes: Clupeidae) southern part of the Northeast Atlantic Ocean. *Cybium* **2019**, *43*, 291–293, doi:10.26028/cybium/2019-433-011.
- Khamees, N.; Adday, T.; Abed, J. Occurrence and Redescription of *Thryssa setirostris* (Broussonet, 1782) (Clupiformes, Engraulidae) from Iraqi Marine Water. *Bulletin of the Iraq Natural History Museum* **2018**, *15*, 123–130, doi:10.26842/binhm.7.2018.15.2.0123.
- Kohanestani, Z.M.; Ghorbani, R.; Yelghi, S.; Fazel, A.; Zoghi, M. An investigation on morphology, age and growth of the Caspian Sea Kilka (*Clupeonella cultriventris*) in Babolsar, southern Caspian Sea. *International Journal of Aquatic Biology* **2013**, *1*, 143–149.
- Randall, J.E. Randall's tank photos. Collection of 10,000 large-format photos (slides) of dead fishes. Available online: [www.fishbase.org](http://www.fishbase.org) (see species pages for more details) (accessed on June 29).
- Reyes, R.B. Photos contributed by Rodolfo B. Reyes to Fishbase. Available online: [www.fishbase.org](http://www.fishbase.org) (see species pages for more details) (accessed on July 31).

### **Dussumieriidae**

- Mili, S.; Ennouri, R.; Rafrafi-Nouira, S. Additional record of Golani round herring, *Etrumeus golanii* (Osteichthyes: Dussumieriidae) from Tunisian waters with comments on its distribution in the Mediterranean Sea. *Annales, Series historia naturalis* **2020**, *30*, 105–110.
- Randall, J.E.; DiBattista, J.D. *Etrumeus makiawa*, a New Species of Round Herring (Clupeidae: Dussumierinae) from the Hawaiian Islands. *Pacific Science* **2012**, *66*, 97–110, doi:10.2984/66.1.6.

### **Engraulidae**

- Garcia Júnior, J.; Nóbrega, M.F.; Oliveira, J.E.L. Coastal fishes of Rio Grande do Norte, northeastern Brazil, with new records. *Check List* **2015**, *11*, doi:10.15560/11.3.1659.
- Monarch. Fish specimens housed at the California Academy of Sciences uploaded to Monarch. Available online: <http://monarch.calacademy.org/index.php> (accessed on July 24).
- Strasburg, D.W. A new Hawaiian engraulid fish. *Pacific Science* **1960**, *14*, 3953–3999.

## Cypriniformes

### Cyprinidae

- Ali, A.M.; Tomas, N.K. Some ecological aspects of bizz *Barbus esocinus* Heckel, 1843 (Actinopterygii, Cyprinidae) from Tigris and Euphrates rivers - Iraq. *Tropical Freshwater Biology* **2009**, *18*, 27–50.
- Britz, R.; Conway, K.W.; Rüber, L. Miniatures, morphology and molecules: *Paedocypris* and its phylogenetic position (Teleostei, Cypriniformes). *Zool J Linn Soc* **2014**, *172*, 556-615, doi:10.1111/zoj.12184.
- Braich, O.S.; Akhter, S. Morphometric characters and meristic counts of a Fish, *Crossocheilus latius* (Hamilton-Buchanan) from Ranjit Sagar Wetland, India. *International Journal of Fisheries and Aquatic Studies* **2015**, *2*, 260-265.
- Braich, O.S.; Akhter, S. Morphometric characters and meristic counts of a fish, *Garra gotyla gotyla* (Gray) from Ranjit Sagar Wetland, situated in the Himalayan foothills, India. *International Research Journal of Biological Sciences* **2015**, *4*, 66-72.
- Hoang, H.D.; Pham, H.M.; Durand, J.D.; Tran, N.T.; Phan, P.D. Mahseers genera *Tor* and *Neolissochilus* (Teleostei: Cyprinidae) from southern Vietnam. *Zootaxa* **2015**, *4006*, 551-568, doi:10.11646/zootaxa.4006.3.8.
- Hora, S.L. The Game Fishes of India. XVI.-The mahseers or the large-scaled barbels of India. 9. Further observations on mahseers from the Deccan. *J Bombay Nat Hist Soc* **1943**, *44*, 1-8.
- Hossain, M.Y.; Ohtomi, J.; Ahmed, Z.F. Morphometric, meristic characteristics and conservation of the threatened fish, *Puntius sarana* (Hamilton, 1822) (Cyprinidae) in the Ganges River, Northwestern Bangladesh. *Turkish Journal of Fisheries and Aquatic Sciences* **2009**, *9*, 223-225, doi:10.4194/trjfas.2009.0215.
- Jurajda, P.; Pavlov, I. Rediscovery of *Rutilus virgo* in the River Dyje, Czech Republic. *Folia Zoologica* **2016**, *65*, 98–100.
- Kaeding, L.R.; Burdick, B.D.; Schrader, P.A.; Noonan, W.R. Recent Capture of a Bonytail (*Gila elegans*) and Observations on This Nearly Extinct Cyprinid from the Colorado River. *Copeia* **1986**, *1986*, 1021-1023, doi:10.2307/1445305.
- Kottelat, M.; Lim, K.K.P. Two new species of *Barbodes* from the Malay Peninsula and comments on 'cryptic species' in the *B. binotatus* group (Teleostei: Cyprinidae). *Raffles Bulletin of Zoology* **2021**, *69*, 522-540, doi:10.26107/RBZ-2021-0069.
- Naeem, M.; Abidi, S.Z.A.; Khan, M.; Ishtiaq, A.; Naeem, Z. Length–weight, length-length and condition factor relationships of *Labeo gonius* (Hamilton) from Taunsa Barrage, River Indus, Pakistan *International Journal of Fisheries and Aquatic Studies* **2017**, *5*, 15-19.
- Pervaiz, K.; Iqbal, Z.; Mirza, M.R.; Javed, M.N.; Naeem, M.; Ishtiaq, A. Length-weight, length-length relationships and feeding habits of wild Indus Mahseer, *Tor macrolepis*, from Attock, Pakistan. *Journal of Applied Ichthyology* **2012**, *28*, 673-676, doi:10.1111/j.1439-0426.2012.01953.x.
- Pinder, A.C.; Manimekalan, A.; Knight, J.D.M.; Krishnankutty, P.; Britton, J.R.; Philip, S.; Dahanukar, N.; Raghavan, R. Resolving the taxonomic enigma of the iconic game fish, the hump-backed mahseer from the Western Ghats biodiversity hotspot, India. *PLOS ONE* **2018**, *13*, e0199328, doi:10.1371/journal.pone.0199328.
- Rehman, F.U.; Rehman, H.U.; Aman, S.; Aziz, S.; Shabir, H.; Majid, A.; Ullah, A.; Rehman Safi, A.U.; Subhan, F. Morphometric and meristic analysis of silver carp (*Hypophthalmichthys molitrix*). *Global Veterinaria* **2015**, *15*, 82-92, doi:10.5829/idosi.gv.2015.15.01.95217.
- Shao, K.T.; Lim, P.L. *Fishes of freshwater and estuary. Encyclopedia of field guide in Taiwan*; Recreation Press: Taipei, 1991; p. 240.



Talabishka, E.; Didenko, A.; Velykopskiy, I. Some biological data on cactus roach, *Rutilus virgo* (Heckel), in rivers of the Transcarpathian region of Ukraine. *Archives of Polish Fisheries* **2015**, *23*, 67–77, doi:10.1515/aopf-2015-0008.

### *Gonorynchiformes*

#### **Chanidae**

Gandhi, V.; Mohanraj, G.; Thiagarajan, R. Biology and biometry of milkfish *Chanos chanos* (Forsskal). *Journal of the Marine Biological Association of India* **1986**, *28*, 169–171.

#### **Gonorynchidae**

Roberts, C.D.; Grande, T.C. The sandfish, *Gonorynchus forsteri* (Gonorynchidae), from bathyal depths off New Caledonia, with notes on New Zealand specimens. *Proceedings of the 5th Indo-Pacific Conference, Nouméa* **1997**, 195–205.

Te Papa Museum. sandfish, *Gonorynchus forsteri* Ogilby, 1911. Available online: <https://collections.tepapa.govt.nz/object/207459> (accessed on August 5).

### *Gymnotiformes*

#### **Gymnotidae**

de Santana, C.D.; Crampton, W.G.R.; Dillman, C.B.; Frederico, R.G.; Sabaj, M.H.; Covain, R.; Ready, J.; Zuanon, J.; de Oliveira, R.R.; Mendes-Júnior, R.N.; et al. Unexpected species diversity in electric eels with a description of the strongest living bioelectricity generator. *Nature Communications* **2019**, *10*, 4000, doi:10.1038/s41467-019-11690-z.

Maxime, E.L.; Albert, J.S. A new species of *Gymnotus* (Gymnotiformes: Gymnotidae) from the Fitzcarrald Arch of southeastern Peru. *Neotropical Ichthyology* **2009**, *7*, 579–585, doi:10.1590/s1679-62252009000400004.

### *Siluriformes*

Note: for catfishes the data in Schultz (1944) was considered excluding Loricariidae, as measurements for these taxa were reported including the supraoccipital and it is not clear if this measurement corresponds to head length in the same way as it does for other bony fishes. Additionally, loricariids seem to have a posteriorly displaced orbit, which causes issues with anatomical assumptions regarding OOL (see manuscript)

#### **Ariidae**

Betancur-R, R.; P, A.A. Description of *Notarius biffi* n. sp. and redescription of *N. insculptus* (Jordan and Gilbert) (Siluriformes: Ariidae) from the eastern Pacific, with evidence of monophyly and limits of *Notarius*. *Zootaxa* **2004**, *703*, doi:10.11646/zootaxa.703.1.1.

Betancur-R, R.; P, A.A.A. Description of *Cathorops mapale*, a new species of sea catfish (Siluriformes: Ariidae) from the Colombian Caribbean, based on morphological and mitochondrial evidence. *Zootaxa* **2005**, *1045*, doi:10.11646/zootaxa.1045.1.4.

De la Cruz-Agüero, J.; Cota-Gómez, V.M.; Nieto-Navarro, J.T. New maximum size record for the Chili sea catfish *Notarius troschelii* (Siluriformes: Ariidae) from the tropical eastern Pacific. *Marine Biodiversity Records* **2010**, *3*, doi:10.1017/s1755267210000916.

Garcia Júnior, J.; Nóbrega, M.F.; Oliveira, J.E.L. Coastal fishes of Rio Grande do Norte, northeastern Brazil, with new records. *Check List* **2015**, *11*, doi:10.15560/11.3.1659.

#### **Auchenipteridae**



Schultz, L.P. The catfishes of Venezuela, with descriptions of thirty-eight new forms. *Proceedings of the United States National Museum* **1944**, 94, 173-338.

### **Bagridae**

- Amin, M.R.; Mollah, M.F.; Taslima, K.; Muhammadullah. Morphological observation and length-weight relationship of critically endangered riverine catfish *Rita rita* (Hamilton). *Pakistan Journal of Biological Sciences* **2014**, 17, 234-240, doi:10.3923/pjbs.2014.234.240.
- Nair, S.M.; Kumari, K.; Kumar, A.P.; Raghavan, R.; Jaiswar, A.K. The identity and distribution of striped bagrid catfish, *Mystus tengara* (Hamilton 1822) revealed through integrative taxonomy. *Molecular Biology Reports* **2021**, doi:10.1007/s11033-021-06880-2.
- Priyanka, C.; Tewari, G.; Datta, S.N.; Kumar B. T., N. Morphometric and meristic variations in different fish species of family Bagridae from Harike wetland. *Journal of Entomology and Zoology Studies* **2020**, 8, 1788-1793.
- Saini, A.; Dua, A.; Mohindra, V. Comparative morphometrics of two populations of giant river catfish (*Mystus seenghala*) from the Indus river system. *Integr Zool* **2008**, 3, 219–226, doi:10.1111/j.1749-4877.2008.00099.x.
- Vo, L.T.T.; Tran, A.N.; Phan, T.Q.; Dinh, Q.M. Morphometrics variations of *Mystus mysticetus* Roberts, 1992 in the Mekong Delta, Vietnam. *AACL Bioflux* **2021**, 14, 3423–3431.

### **Heptapteridae**

- Benitez, M.F.; Terán, G.E.; Alonso, F.; Aguilera, G.; Mirande, J.M. *Cetopsorhamdia iheringi* (Siluriformes, Heptapteridae): a new record for the freshwater ichthyofauna of Argentina. *Revista del Museo Argentino de Ciencias Naturales* **2017**, 19, 113-119.
- Kütter, M.T.; Bemvenuti, M.D.A.; Moresco, A. Feeding strategy of the jundiá *Rhamdia quelen* (Siluriformes, Heptapteridae) in coastal lagoons of southern Brazil. *Acta Scientiarum. Biological Sciences* **2009**, 31, doi:10.4025/actascibiols.v31i1.335.
- Pinho, S.M.; David, L.H.; Garcia, F.; Keesman, K.J.; Portella, M.C.; Goddek, S. South American fish species suitable for aquaponics: a review. *Aquaculture International* **2021**, 29, 1427-1449, doi:10.1007/s10499-021-00674-w.

### **Ictaluridae**

- Bean, T.H. Description of a new species of *Amiurus* (*A. ponderosus*) from the Mississippi River. *Proceedings of the United States National Museum* **1880**, 2, 286–290.

### **Pangasiidae**

- Ajith Kumar, T.T.; Kumar, S.; K. Lal, K. Length-weight relationship of a newly described catfish *Pangasius silasi* Dwivedi et al., 2017 from Nagarjuna Sagar Dam, Telengana, India. *Indian Journal of Fisheries* **2020**, 67, doi:10.21077/ijf.2019.67.2.88546-19.
- Ayyathurai, K.P.V.; Kodeeswaran, P.; Mohindra, V.; Singh, R.K.; Ravi, C.; Kumar, R.; Valaparambil, B.; Thipramalai Thangappan, A.K.; Jena, J.; Lal, K.K. Description of a new *Pangasius* (Valenciennes, 1840) species, from the Cauvery River extends distribution range of the genus up to South Western Ghats in peninsular India. *PeerJ* **2022**, 10, doi:10.7717/peerj.14258.
- Dwivedi, A.K.; Gupta, B.K.; Singh, R.K.; Mohindra, V.; Chandra, S.; Easawarn, S.; Jena, J.; Lal, K.K. Cryptic diversity in the Indian clade of the catfish family Pangasiidae resolved by the description of a new species. *Hydrobiologia* **2017**, 797, 351-370, doi:10.1007/s10750-017-3198-z.

Gustiano, R.; Teugels, G.G.; Pouyaud, L. Revision of the *Pangasius kunyit* catfish complex, with description of two new species from South-East Asia (Siluriformes; Pangasiidae). *Journal of Natural History* **2003**, *37*, 357-376, doi:10.1080/713834687.

Pouyaud, L.; Teugels, G.G. Description of a new pangasiid catfish from East Kalimantan, Indonesia (Siluriformes, Pangasiidae). *Ichthyological Exploration of Freshwaters* **2000**, *11*, 193-200.

### **Pimelodidae**

Buitrago-Suárez, U.A.; Burr, B.M. Taxonomy of the catfish genus *Pseudoplatystoma* Bleeker (Siluriformes: Pimelodidae) with recognition of eight species. *Zootaxa* **2007**, *1512*, 1-38, doi:10.11646/zootaxa.1512.1.1.

Garavello, J.C. Revision of genus *Steindachneridion* (Siluriformes: Pimelodidae). *Neotropical Ichthyology* **2005**, *3*, 607-623, doi:10.1590/s1679-62252005000400018.

Lundberg, J.G. *Brachyplatystoma promagdalena*, new species, a fossil goliath catfish (Siluriformes: Pimelodidae) from the Miocene of Colombia, South America. *Neotropical Ichthyology* **2005**, *3*, 597-605, doi:http://dx.doi.org/10.1590/S1679-62252005000400017.

Lundberg, J.G.; Mago-Leccia, F.; Nass, P. *Exallodontus anguanai*, a new genus and species of Pimelodidae (Pisces: Siluriformes) from deep river channels of South America, and delimitation of the subfamily Pimelodinae. *Proceedings of the Biological Society of Washington* **1991**, *104*, 840-869.

Masdeu, M.; Mello, F.T.-d.; Loureiro, M.; Arim, M. Feeding habits and morphometry of *Iheringichthys labrosus* (Lütken, 1874) in the Uruguay River (Uruguay). *Neotropical Ichthyology* **2011**, *9*, 657-664, doi:10.1590/s1679-62252011005000034.

Schultz, L.P. The catfishes of Venezuela, with descriptions of thirty-eight new forms. *Proceedings of the United States National Museum* **1944**, *94*, 173-338.

Stewart, D.J. Revision of *Pimelodina* and Description of a New Genus and Species from the Peruvian Amazon (Pisces: Pimelodidae). *Copeia* **1986**, *1986*, 653-672, doi:10.2307/1444947.

### **Plotosidae**

Ali, M.; Saad, A.; Soliman, A. Expansion Confirmation of the Indo-Pacific Catfish, *Plotosus lineatus* (Thunberg, 1787), (Siluriformes: Plotosidae) into Syrian Marine Waters. *American Journal of Biology and Life Sciences* **2015**, *3*, 7-11.

### **Sisoridae**

Dahanukar, N.; Diwekar, M.; Paingankar, M. Rediscovery of the threatened Western Ghats endemic sisorid catfish *Glyptothorax poonaensis* (Teleostei: Siluriformes: Sisoridae). *Journal of Threatened Taxa* **2011**, *3*, 1885-1898.

Dey, S.; Manorama, M.; Ramanujam, S.N. New records of three species of fish in the upper reaches of the Brahmaputra and Surma-Meghna river basins, Meghalaya, India. *Journal of Threatened Taxa* **2015**, *7*, 7922-7926, doi:10.11609/JoTT.o3297.7922-6.

## **Stem Euteleostei**

### *Aulopiformes*

#### **Alepisauridae**

Bean, T.H. Description of a new species of *Alepidosaurus* (*A. aesculapius*) from Alaska. *Proceedings of the United States National Museum* **1883**, *5*, 661-663.

Gill, T. Description of new species of Alepidosauroidae. *Proceedings of the Academy of Natural Sciences of Philadelphia* **1862**, *14*, 127-132.

### **Paralepididae**

Mytilineou, C.; Anastasopoulou, A.; Christides, G.; Bekas, P.; Smith, C.J.; Papadopoulou, K.N.; Lefkaditou, E.; Kavadas, S. New records of rare deep-water fish species in the Eastern Ionian Sea (Mediterranean Sea). *Journal of Natural History* **2013**, *47*, 1645-1662, doi:10.1080/00222933.2013.775372.

### **Synodontidae**

Bogorodsky, S.V.; Alpermann, T.J.; Mal, A.O.; Gabr, M.H. Survey of demersal fishes from southern Saudi Arabia, with five new records for the Red Sea. *Zootaxa* **2014**, *3852*, 401-437, doi:10.11646/zootaxa.3852.4.1.

Chhandaprajnadarsini, E.M.; Roul, S.K.; Swain, S.; Jaiswar, A.K.; Shenoy, L.; Chakraborty, S.K. Biometric analysis of brushtooth lizard fish *Saurida undosquamis* (Richardson, 1848) from Mumbai waters. *Journal of Entomology and Zoology Studies* **2018**, *6*, 1165-1171.

Russell, B.C.; Golani, D.; Tikochinski, Y. *Saurida lessepsianus* a new species of lizardfish (Pisces: Synodontidae) from the Red Sea and Mediterranean Sea, with a key to *Saurida* species in the Red Sea. *Zootaxa* **2015**, *3956*, 559-568, doi:10.11646/zootaxa.3956.4.7.

### *Esociformes*

### **Esocidae**

Casselman, J.M.; Crossman, E.J.; Ihssen, P.E.; Reist, J.D.; Booke, H.E. Identification of muskellunge, northern pike, and their hybrids. *American Fisheries Society Special Publication* **1986**, *15*, 14-46.

Denys, G.P.; Dettai, A.; Persat, H.; Hautecoeur, M.; Keith, P. Morphological and molecular evidence of three species of pikes *Esox* spp. (Actinopterygii, Esocidae) in France, including the description of a new species. *Comptes Rendus Biologies* **2014**, *337*, 521-534, doi:10.1016/j.crv.2014.07.002.

### *Gadiformes*

### **Bregmacerotidae**

Bogorodsky, S.V.; Alpermann, T.J.; Mal, A.O.; Gabr, M.H. Survey of demersal fishes from southern Saudi Arabia, with five new records for the Red Sea. *Zootaxa* **2014**, *3852*, 401-437, doi:10.11646/zootaxa.3852.4.1.

### **Gadidae**

Privalikhin, A.M.; Norvillo, G.V. On the Finding of a Rare Species—Norwegian Pollock *Theragra finnmarchica* Koefoed, 1956 (Gadidae)—in the Barents Sea. *Journal of Ichthyology* **2010**, *50*, 143-147.

### **Lotidae**

Pais, A.; Merella, P.; Follesa, M.C.; Garippa, G.; Golani, D. New data on *Gaidropsarus granti* (Regan, 1903) (Gadiformes: Lotidae) from the Mediterranean Sea, with emphasis on its parasites. *Scientia Marina* **2008**, *72*, 461-468.

### **Moridae**

Bilecenoglu, M.; Bogaç Kunt, K.; Taşkavak, E. First record of *Mora moro* (Risso, 1810) (Pisces, Moridae) from the eastern Mediterranean Sea. *Israel Journal of Zoology* **2002**, *48*, 243-257.

Diatta, Y.; Rafrafi-Nouira, S.; Diaby, A.; Reynaud, C.; Capapé, C. First substantial records of *Physiculus dalwigki* (Moridae) from the coast of Senegal (eastern tropical Atlantic). *Thalassia Salientia* **2021**, *43*, 3-8, doi:10.1285/i15910725v43p3.

## Galaxiiformes

### Galaxiidae

Te Papa Museum. Eldon's galaxias, *Galaxias eldoni* McDowall, 1997. Available online:

<https://collections.tepapa.govt.nz/object/208192> (accessed on August 5).

## Lampriformes

Sulić Šprem, J.; Dobroslavić, T.; Kožul, V.; Prusina, I.; Onofri, V.; Antolović, N. New record of *Lophotus lacepede* Giorna, 1809 and *Lampris guttatus* (Brünnich, 1788) in the southeastern Adriatic Sea (Croatian coast). *Cahiers de Biologie Marine* **2014**, 55, 371–373.

### Lampridae

Gudger, E.W. The Opah or Moonfish, *Lampris luna*, on the Eastern Coast of North America. *Am Nat* **1930**, 64, 168–178.

Gudger, E.W. The Opah or Moonfish, *Lampris luna*, on the Coasts of California and of Hawaii. *Am Nat* **1931**, 65, 531–540.

Sulić Šprem, J.; Dobroslavić, T.; Kožul, V.; Prusina, I.; Onofri, V.; Antolović, N. New record of *Lophotus lacepede* Giorna, 1809 and *Lampris guttatus* (Brünnich, 1788) in the southeastern Adriatic Sea (Croatian coast). *Cahiers de Biologie Marine* **2014**, 55, 371–373.

Underkoffler, K.E.; Luers, M.A.; Hyde, J.R.; Craig, M.T. A taxonomic review of *Lampris guttatus* (Brunnich 1788) Lampridiformes; Lampridae) with descriptions of three new species. *Zootaxa* **2018**, 4413, 551–565, doi:10.11646/zootaxa.4413.3.9.

### Lophotidae

Bachouche, S.; Etsouri, M.; Rouidi, S. The first record of Crested Oarfish, *Lophotus lacepede* (Actinopterygii: Lampriformes) from the marine waters of Algeria. *International Journal of Science and Knowledge* **2016**, 5, 19–22.

Dulčić, J.; Soldo, A. New finding of crested oarfish *Lophotus lacepede* (Lophotidae), in the Adriatic Sea. *Cybiurn* **2008**, 32, 93–94.

Falsone, F.; Geraci, M.L.; Scannella, D.; Okpala, C.O.R.; Giusto, G.B.; Bosch-Belmar, M.; Gancitano, S.; Bono, G. Occurrence of two rare species from order Lampriformes: Crestfish *Lophotus lacepede* (Giorna, 1809) and scalloped ribbonfish *Zu cristatus* (Bonelli, 1819) in the northern coast of Sicily, Italy. *Acta Adriatica: International Journal of Marine Sciences* **2017**, 58, 137–146.

Sulić Šprem, J.; Dobroslavić, T.; Kožul, V.; Prusina, I.; Onofri, V.; Antolović, N. New record of *Lophotus lacepede* Giorna, 1809 and *Lampris guttatus* (Brünnich, 1788) in the southeastern Adriatic Sea (Croatian coast). *Cahiers de Biologie Marine* **2014**, 55, 371–373.

### Regalecidae

Lee, H.W.; Yang, J.H.; Sohn, M.H.; Lee, J.B.; Chun, Y.Y.; Hwang, K.S.; Lee, D.W. Occurrence of *Architeuthis* sp. and *Regalecus russellii* in the East Sea, Korea. *Korean Journal of Fisheries and Aquatic Sciences* **2013**, 46, 856–861.

Ruiz, A.E.; Gosztonyi, A.E. Records of regalecid fishes in Argentine waters. *Zootaxa* **2010**, 2509, doi:10.11646/zootaxa.2509.1.5.

### Trachipteridae

Falsone, F.; Geraci, M.L.; Scannella, D.; Okpala, C.O.R.; Giusto, G.B.; Bosch-Belmar, M.; Gancitano, S.; Bono, G. Occurrence of two rare species from order Lampriformes: Crestfish *Lophotus lacepede* (Giorna, 1809) and scalloped ribbonfish *Zu cristatus* (Bonelli, 1819) in the northern coast of Sicily, Italy. *Acta Adriatica: International Journal of Marine Sciences* **2017**, 58, 137–146.

### Salmoniformes

Holčík, J.; Hensel, K.; Nieslanik, J.; Skácel, L. *The Eurasian Huchen, Hucho hucho*; 1988.

Holčík, J.; Stefanov, T. Taxonomic status of salmonids in the Bulgarian stretch of the Danube River and their bionomic strategy. *Journal of Applied Ichthyology* **2008**, *24*, 605-609, doi:10.1111/j.1439-0426.2008.01082.x.

Pavlov, S.D.; Pivovarov, E.A.; Ostberg, C.O. Dwarf char, a new form of chars (the genus *Salvelinus*) in Lake Kronotskoe. *Doklady Biological Science* **2012**, *442*, 282-285, doi:10.1134/S0012496612010048.

Rosenfield, J.A. Detection of Natural Hybridization between Pink Salmon (*Oncorhynchus gorbuscha*) and Chinook Salmon (*Oncorhynchus tshawytscha*) in the Laurentian Great Lakes Using Meristic, Morphological, and Color Evidence. *Copeia* **1998**, *1998*, 706-714, doi:10.2307/1447801.

Schwartz, F.J. Morphological and meristic features of pure and hybrid North American trout (family Salmonidae). *Journal of the North Carolina Academy of Science* **2007**, *123*, 242-251.

Te Papa Museum. Chinook salmon, *Oncorhynchus tshawytscha* (Walbaum, 1792). Available online: <https://collections.tepapa.govt.nz/object/840404> (accessed on August 5).

### Stomiiformes

#### Gonostomatidae

Ayas, D.; Akbora, H.D.; Ergüden, D. Maximum length report of *Gonostoma denudatum* Rafinesque, 1810 in the Eastern Mediterranean Sea. *Marine Science and Technology Bulletin* **2020**, *9*, 83-86, doi:10.33714/masteb.690826.

#### Stomiidae

Rafrafi-Nouira, S.; Souissi, J.B.; Capapé, C. About teleost species from deep marine Tunisian waters: with additional records of Sloane's viperfish *Chauliodus sloani* and confirmed occurrence of blackfin sorcerer *Nettastoma melanurum*. *Annales, Series historia naturalis* **2018**, *28*, 51-58, doi:10.19233/ASHN.2018.08.

### Zeiformes

Fernández, A.M.; Lloris, D.; Pérez Gil, J.L.; Esteban, A. On the occurrence of *Zenopsis conchifer* (Lowe, 1852) (Osteichthyes, Zeidae) in the Mediterranean Sea. *Arxius de Miscel·lània Zoològica* **2012**, *10*, 50-54.

Ragonese, S.; Giusto, G.B. *Zenopsis conchifera* (Lowe, 1852) (Pisces, Actinopterygii, Zeidae): a new alien fish in the Mediterranean Sea. *Journal of Fish Biology* **2007**, *71*, 1853-1857, doi:10.1111/j.1095-8649.2007.01636.x.

### Acanthopterygii

#### Acanthuriformes

#### Acanthuridae

Randall, J.E. Randall's tank photos. Collection of 10,000 large-format photos (slides) of dead fishes.

Available online: [www.fishbase.org](http://www.fishbase.org) (see species pages for more details) (accessed on June 29).

#### Luvaridae

Gregory, W.K.; Conrad, G.M. The osteology of *Luvarus imperialis*, a scombroid fish: a study in adaptive evolution. *Bull Am Mus Nat Hist* **1943**, *81*, 225-283.

- Gül, B.; Ataç, E. The rare and little-known luvar, *Luvarus imperialis* Rafinesque, 1810, from Edremit Bay (Aegean coast of Turkey). *Mediterranean Marine Science* **2020**, *21*, 351-352.
- Nichols, J.T.; Helmuth, W.T., III. A Long Island *Luvarus imperialis* Rafinesque. *American Museum Novitatus* **1940**, *1085*, 1-2.

#### *Acropomatiformes*

- Jawad, L.A.; Koeda, K. Records of *Pempheris schwenkii* Bleeker (1855) and *Pempheris mangula* Cuvier (1829) from the Omani waters. *Journal of Applied Ichthyology* **2013**, *29*, 1378-1379, doi:10.1111/jai.12240.
- Randall, J.E.; Bineesh, K.K. Review of the fishes of the genus *Pempheris* (Perciformes: Pempheridae) of India, with description of a new species and a neotype for *P. mangula* Cuvier. *Journal of the Ocean Science Foundation* **2014**, *10*, 20-40.

#### **Epigoniidae**

- Catarino, D.; Stefanni, S.; Porteiro, F.M.; Rosa, A.; Giacomello, E. First record of the pencil cardinal *Epigonus denticulatus* (Perciformes: Epigonidae) in the Azores archipelago. *Journal of Fish Biology* **2021**, *99*, 253-257, doi:10.1111/jfb.14689.
- Ergüden, D.; Bayhan, Y.K.; Altun, A. First record of *Epigonus denticulatus* Dieuzeide, 1950, (Osteichthyes: Epigonidae), from Mersin Bay, Turkey. *Cahiers de Biologie Marine* **2017**, *58*, 359-362, doi:10.21411/CBM.A.23961BB3.
- Rafrafi-Nouira, S.; Golani, D.; Capapé, C. First substantiate record of *Epigonus telescopus* (Osteichthyes: Epigonidae) from the Tunisian coast (Central Mediterranean Sea). *Cahiers de Biologie Marine* **2019**, *60*, 469-471, doi:10.21411/CBM.A.BA22F39.
- Ruiz-Pico, S.; Arronte, J.C.; Punzón, A.; Serrano, A.; Velasco, F.; Fernández-Zapico, O. First records of *Epigonus denticulatus* (Perciformes: Epigonidae) in the northern waters of Spain: northernmost occurrences in the eastern North Atlantic. *Cybium* **2012**, *36*, 578-580, doi:10.26028/cybium/2012-364-011.

#### *Anabantiformes*

##### **Channidae**

- Kashyap, A.; Awasthi, M.; Serajuddin, M. Geographic Morphometric Variations of Freshwater Murrel, *Channa punctatus* from Northern and Eastern Parts of India. *Proceedings of the National Academy of Sciences, India Section B: Biological Sciences* **2014**, *86*, 367-373, doi:10.1007/s40011-014-0451-3.
- Kumar, R.; Jaiswar, A.K.; Sharma, R.; Prasad, L. Quantification of morphological variations among populations of *Channa gachua* (Hamilton, 1822) from different geographical locations in India. *Indian Journal of Fisheries* **2020**, *67*, doi:10.21077/ijf.2019.67.2.93891-16.
- Vodonnou, D.S.J.V.; Kpogue, D.S.; Akpo, Y.; Aknika, M.; Amplifier, E.D. Determination of sexual dimorphism of snakehead (*Parachanna obscura*): morphometric and meristic parameters, weight-length relationship and condition factor. *International Journal of Biology, Chemistry, and Science* **2017**, *11*, 1742-1752.
- Yen, D.T.; Duyen, V.N.; Hien, T.T.T.; Pomeroy, R.; Hillary, E. Variation in morphometric characteristics between cultured and wild striped snakehead (*Channa striata*) populations in the Mekong Delta. *Can Tho University Journal of Science* **2019**, *11*, 70-77, doi:10.22144/ctu.jen.2019.010.

##### **Nandidae**

- Chakrabarty, P.; Oldfield, R.G.; Ng, H.H. *Nandus prolixus*, a new species of leaf fish from northeastern Borneo (Teleostei: Perciformes: Nandidae). *Zootaxa* **2006**, *1328*, doi:10.11646/zootaxa.1328.1.4.

Hasan Mredul, M.M.; Alam, M.R.; Akkas, A.B.; Sharmin, S.; Pattadar, S.N.; Ali, M.L. Some reproductive and biometric features of the endangered Gangetic Leaf Fish, *Nandus nandus* (Hamilton, 1822): Implication to the baor fisheries management in Bangladesh. *Aquaculture and Fisheries* **2021**, *6*, 634-641, doi:<https://doi.org/10.1016/j.aaf.2020.10.007>.

### *Atheriniformes*

Goode, G.B.; Bean, T.H. Catalogue of a collection of fishes sent from Pensacola, Florida, and vicinity, by Mr. Silas Stearns, with descriptions of six new species. *Proceedings of the United States National Museum* **1879**, *2*, 121–156.

Kimura, S.; Iwatsuki, Y.; Yoshino, T. A new silverside, *Atherinomorus aetholepis* sp. nov., from the West Pacific (Atheriniformes: Atherinidae). *Ichthyological Research* **2002**, *49*, 240-244.

Mazlan, A.G.; Chung, Y.S.; Zaidi, C.C.; Samat, A.; Arshad, A.; Seah, Y.G.; Alam, G.M.; Simon, K.D. Meristic, morphometrics and length-weight relationship of tropical silverside, *Atherinomorus duodecimalis* (Valenciennes in Cuvier and Valenciennes, 1835) in Seagrass and Mangrove Habitats of Tinggi Island, Johor, Malaysia. *Asian Journal of Animal and Veterinary Advances* **2012**, *7*, 921-927, doi:10.3923/ajava.2012.921927.

Motomura, H.; Harazaki, S. Annotated checklist of marine and freshwater fishes of Yaku-shima Island in the Osumi Island, Kagoshima, southern Japan, with 129 new records. *Bulletin of the Kagoshima University Museum* **2017**, *9*, 1-183.

Randall, J.E. Randall's tank photos. Collection of 10,000 large-format photos (slides) of dead fishes. Available online: [www.fishbase.org](http://www.fishbase.org) (see species pages for more details) (accessed on June 29).

### *Beloniformes*

#### **Adrianichthyidae**

Mandagi, I.F.; Mokodongan, D.F.; Tanaka, R.; Yamahira, K. A New Riverine Ricefish of the Genus *Oryzias* (Beloniformes, Adrianichthyidae) from Malili, Central Sulawesi, Indonesia. *Copeia* **2018**, *106*, 297-304, doi:10.1643/ci-17-704.

#### **Belonidae**

Acarli, D.; Kale, S.; Çakir, K. A new maximum length for the garfish, *Belone belone* (Linnaeus 1761) in the coast of Gökçeada Island (Aegean Sea, Turkey). *Cahiers de Biologie Marine* **2018**, *59*, 385–389, doi:10.21411/cbm.a.55A28635.

Alshawy, F.; Ibrahim, A.; Hussein, C.; Lahlah, M. First record of the flat needlefish *Ablennes hians* (Valenciennes, 1846) from Syrian marine waters (eastern Mediterranean). *Marine Biodiversity Records* **2019**, *12*, 15, doi:10.1186/s41200-019-0174-5.

Deidun, A.; Zava, B.; Corsini-Foka, M.; Galdies, J.; Di Natale, A.; Collete, B.B. First record of the flat needlefish, *Ablennes hians* (Belonidae) in central Mediterranean waters (Western Ionian Sea). *Annales, Series historia naturalis* **2021**, *31*, 9-16, doi:10.19233/ASHN.2021.02.

Dulçic, J.; Soldo, A. A new maximum length for the garpike *Belone belone* (Belonidae). *Cybium* **2006**, *30*, 382.

Michailidis, N. First confirmed record of the agujon needlefish *Tylosurus imperialis* (Rafinesque, 1810) from Cyprus. *Mediterranean Marine Science* **2020**, *21*, 355-356.

Randall, J.E. Randall's tank photos. Collection of 10,000 large-format photos (slides) of dead fishes. Available online: [www.fishbase.org](http://www.fishbase.org) (see species pages for more details) (accessed on June 29).

Roul, S.K.; Abdussamad, E.M.; Rohit, P.; Jaiswar, A.K. New Distributional Record of Flat Needlefish *Ablennes hians* (Valenciennes, 1846) (Beloniformes: Belonidae) in the North-Eastern Indian



Ocean with Taxonomic Details. *Thalassas: An International Journal of Marine Sciences* **2018**, *35*, 43-47, doi:10.1007/s41208-018-0082-1.

Roul, S.K.; Retheesh, T.B.; Ganga, U.; Abdussamad, E.M.; Rohit, P.; Jaiswar, A.K. Length-weight relationships of five needlefish species from Kerala waters, south-west coast of India. *Journal of Applied Ichthyology* **2018**, *34*, 190-192, doi:10.1111/jai.13527.

### Exocoetidae

Ben Souissi, J.; Golani, D.; Mejri, H.; Capapé, C. On the occurrence of *Cheilopogon furcatus* in the Mediterranean Sea. *Journal of Fish Biology* **2007**, *67*, 1144-1149, doi:10.1111/j.1095-8649.2005.00790.x.

Chang, S.-K.; Yuan, T.-L.; Hoyle, S.D.; Farley, J.H.; Shiao, J.-C. Growth Parameters and Spawning Season Estimation of Four Important Flyingfishes in the Kuroshio Current Off Taiwan and Implications From Comparisons With Global Studies. *Frontiers in Marine Science* **2022**, *8*, doi:10.3389/fmars.2021.747382.

Falautano, M.; Perzia, P.; Castriota, L. First record of the Lessepsian fish *Parexocoetus mento* in Italian waters and GIS-based spatial and temporal distribution in Mediterranean Sea. *Journal of the Marine Biological Association of the United Kingdom* **2020**, *100*, 1163-1169, doi:10.1017/s002531542000096x.

Randall, J.E. Randall's tank photos. Collection of 10,000 large-format photos (slides) of dead fishes. Available online: [www.fishbase.org](http://www.fishbase.org) (see species pages for more details) (accessed on June 29).

### Hemirhamphidae

Rafrafi-Nouira, S.; Boumaïza, M.; Reynaud, C.; Capape, C. Additional records of Lessepsian teleost species off the Tunisian coast (central Mediterranean). *Annales, Series Historia Naturalis* **2012**, *22*, 55-62.

### Beryciformes

Hagiwara, K.; Motomura, H. First Japanese record of *Sargocentron iota* (Beryciformes: Holocentridae) from Kakeroma Island, Amami Islands, Japan. *Japanese Journal of Ichthyology* **2019**, *66*, 1-5, doi:10.11369/jji.18-035.

### Blenniiformes

#### Blenniidae

Randall, J.E. Randall's tank photos. Collection of 10,000 large-format photos (slides) of dead fishes. Available online: [www.fishbase.org](http://www.fishbase.org) (see species pages for more details) (accessed on June 29).

### Callionymiformes

Michailidis, N.; Chartosia, N. New record of the Seychelles dragonet *Synchiropus sechellensis* Regan, 1908 from the Mediterranean: accidental entrance or Lessepsian immigration? *BioInvasions Records* **2016**, *5*, 291-294, doi:10.3391/bir.2016.5.4.15.

### Carangiformes

Akyol, O.; Çoker, T. Maximum Size of Female Alexandria pompano *Alectis alexandrina* (Carangidae) in the Aegean Sea. *Comu Journal of Marine Science and Fisheries* **2019**, *2*, 142-146.

Ali-Basha, N.; Saad, A.; Hamwi, N.; Tufahha, A. First record of pilotfish *Naucrates ductor* (Linnaeus 1758), Carangidae, in the syrian marine waters (Levantine Basin). *Marine Biodiversity Records* **2021**, *14*, 7, doi:10.1186/s41200-021-00202-y.



- Andaloro, F.; Falautano, M.; Sinopoli, M.; Passarelli, F.M.; Pipitone, C.; Addis, P.; Cau, A.; Castriota, L. The lesser amberjack *Seriola fasciata* (Perciformes: Carangidae) in the Mediterranean: A recent colonist? *Cybium* **2005**, *29*, 141-145.
- Bogorodsky, S.V.; Alpermann, T.J.; Mal, A.O.; Gabr, M.H. Survey of demersal fishes from southern Saudi Arabia, with five new records for the Red Sea. *Zootaxa* **2014**, *3852*, 401-437, doi:10.11646/zootaxa.3852.4.1.
- Capapé, C.; Rafrafi-Nouira, S.; Diatta, Y.; Golani, D. On the Mediterranean occurrence of Guinean amberjack *Seriola carpenteri* (Osteichthyes: Carangidae), with first confirmed record from the Tunisian coast. *Cahiers de Biologie Marine* **2018**, *59*, 399-402, doi:10.21411/CBM.A.FAC33F0D.
- Ergüden, D.; Ayas, D. The confirmed occurrence of two specimens of *Remora remora* (Linnaeus, 1758) from Mersin Bay (NE Mediterranean, Turkey). *Aquatic Research* **2021**, *4*, 293-298, doi:10.3153/ar21023.
- Hata, H.; Haraguchi, Y.; Motomura, H. First record of *Caranx lugubris* (Perciformes: Carangidae) from the Tokara Islands, Kagoshima Prefecture, southern Japan. *Nature of Kagoshima* **2015**, *41*, 69-72.
- Kim, M.J.; Kim, J.S.; Song, C.B. First Record of the Doublespotted Queenfish, *Scomberoides lysan* (Perciformes: Carangidae) from Korea. *Korean Journal of Ichthyology* **2018**, *30*, 242-246.
- Lin, P.-L.; Shao, K.-T. A review of the carangid fishes (family Carangidae) from Taiwan with description of four new records. *Zoological Studies* **1999**, *38*, 33-68.
- Motomura, H.; Iwatsuki, Y.; Yoshino, T.; Kimura, S.; Osamu, I. A record of a carangid fish, *Scomberoides commersonianus*, from Japan (Perciformes, Carangidae). *Japanese Journal of Ichthyology* **1998**, *45*, 101-105.
- Myoung, S.H.; Myoung, J.-G.; Kim, J.-K. New Records of *Remora brachyptera* and *R. osteochir* (Perciformes: Echeneidae) from Korea. *Animal Systematics, Evolution and Diversity* **2015**, *31*, 101-106, doi:10.5635/ased.2015.31.2.101.
- Nichols, J. *Hynnis* and *Alectis* in the American Museum of Natural History. *Bull Am Mus Nat Hist* **1920**, *42*, 285-292.
- Osmany, H.B. Photos uploaded to Fishbase.org by H. B. Osmany. Available online: [www.fishbase.org](http://www.fishbase.org) (see species pages for more details) (accessed on July 27).
- Randall, J.E. Randall's tank photos. Collection of 10,000 large-format photos (slides) of dead fishes. Available online: [www.fishbase.org](http://www.fishbase.org) (see species pages for more details) (accessed on June 29).
- Ray, D.; Mishra, S.S.; Mohapatra, A.; Ghorai, N. Notes on Carangids (Carangiformes: Carangidae) from West Bengal Coast with new records. *Records of the Zoological Survey of India* **2021**, *121*, 511-520, doi:10.26515/rzsi/v121/i4/2021/154542.
- Saha, T.; Datta, S.K.; Zhilik, A.A.; Chowdhury, N.Z.; Baki, M.A.; Ahmed, M.S. New Geographical Record of the Rainbow Runner, *Elagatis bipinnulata* (Quoy & Gaimard, 1825) (Perciformes: Carangidae) from the Bay of Bengal, Bangladesh. *Thalassas: An International Journal of Marine Sciences* **2020**, *37*, 23-26, doi:10.1007/s41208-020-00264-2.
- Sajana, N.; Bijoy Nandan, S. Morphometry, length-weight relationship and relative condition factor of shrimp scad *Alepes djedaba* (Forsskal, 1775) off Cochin coast, Kerala. *Journal of Aquatic Biology and Fisheries* **2017**, *5*, 160-167.
- Sajina, M.; Chakraborty, S.K.; Jaiswar, A.K.; Sudheesan, D. Morphometric and meristic analysis of horse mackerel, *Megalaspis cordyla* (Linnaeus, 1758) populations along the Indian coast. *Indian Journal of Fisheries* **2013**, *60*, 27-34.
- Saker, Y.; Jaiswar, A.K.; Chakraborty, S.K.; Swamy, R.P. Morphometry and length-weight relationship of *Megalaspis cordyla* (Linnaeus, 1758) from Mumbai coast. *Indian Journal of Fisheries* **2004**, *51*, 481-486.
- Whitley, G.P. New sharks and fishes from Western Australia. *The Australian Zoologist* **1947**, *11*, 129-150.

## Coryphaenidae

- Akash, M.; Rahman, R.; Jahan, R.; Naser, M.N. On the rare occurrence of the pompano Dolphinfinh *Coryphaena equiselis* Linnaeus, 1758 (carangiformes: coryphaenidae) in maritime Bangladesh waters. *Species* **2020**, *21*, 227-231.
- Artüz, M.L.; Kubanç, N. First record of *Coryphaena hippurus* (Linnaeus, 1758) from the Sea of Marmara. *Thalassas* **2015**, *31*, 9–13.
- Jawad, L.A.; Mutlak, F.M.; Al-Faisal, A.J.; Waryani, B. The common dolphinfinh *Coryphaena hippurus* Linnaeus, 1758 (Perciformes, Coryphaenidae) in the marine waters of Iraq. *Thalassia Salientia* **2021**, *43*, 23-28, doi:10.1285/i15910725v43p23.
- Nerlović, V.; Mravinac, B.; Devescovi, M. Additional information on the blue runner, *Caranx crysos* (Mitchill, 1815), from the northern Adriatic Sea: meristic and molecular characterizations. *Acta Adriatica: International Journal of Marine Sciences* **2015**, *56*, 309–318.

## Echeneidae

- Tuncer, S.; Orlov, A.M.; Ozen, O. First record of marlin sucker, *Remora osteochir* (Cuvier, 1829), from the northeastern Aegean Sea, Turkey. *Journal of Ichthyology* **2012**, *52*, 400–408, doi:10.1134/s0032945212040145.

## *Carangaria Incertae Sedis*

### Latidae

- Kimura, Y.; Yamanaka, T.; Matsui, S. Second record of Japanese snook *Lates japonicus* from Osaka Bay, Japan. *Japanese Journal of Ichthyology* **2019**, *66*, 109-111, doi:10.11369/jji.18-045.
- Randall, J.E. Randall's tank photos. Collection of 10,000 large-format photos (slides) of dead fishes. Available online: [www.fishbase.org](http://www.fishbase.org) (see species pages for more details) (accessed on June 29).

## Sphyraenidae

- Abdussamad, E.M.; Retheesh, T.B.; Thangaraja, R.; Bineesh, K.K.; Prakasan, D. *Sphyraena arabiansis* a new species of barracuda (Family: Sphyraenidae) from the south-west coast of India. *Indian Journal of Fisheries* **2015**, *62*, 1–6.
- Akyol, O. Additional record of the yellowmouth barracuda, *Sphyraena viridensis* Cuvier, 1829 (Perciformes: Sphyraenidae) from the NE Aegean Sea (Izmir Bay, Turkey). *Journal of Applied Ichthyology* **2015**, *31*, 919-921, doi:10.1111/jai.12832.
- Ayo-Olalusi, C.I.; Ayoade, A.A. Biometric Characteristics of *Sphyraena afra* from Coastal Waters of Lagos State, Nigeria. *Journal of Biology, Agriculture, and Healthcare* **2017**, *7*.
- Béarez, P. Occurrence of *Sphyraena qenie* (Sphyraenidae) in the tropical eastern Pacific, with a key to the species of barracudas occurring in the area. *Cybium* **2008**, *32*, 95–96.
- Dulčić, J.; Kovačić, M.; Dragičević, B. Range extension and additional records of the yellowmouth barracuda, *Sphyraena viridensis* (Actinopterygii: Perciformes: Sphyraenidae) in the eastern Adriatic Sea. *Acta Ichthyologica Et Piscatoria* **2009**, *39*, 59–61, doi:10.3750/aip2009.39.1.12.
- Dulčić, J.; Soldo, A. On the occurrence of the yellowmouth barracuda, *Sphyraena viridensis* Cuvier 1829 (Pisces: Sphyraenidae), in the Adriatic sea. *Annales, Series Historia Naturalis* **2004**, *14*, 225–228.
- González-Acosta, A.F.; Findley, L.T.; Ruiz-Campos, G.; Burnes-Romo, L.A.; Espinosa Pérez, H. Extreme northern range extension of the Pelican barracuda *Sphyraena idastes* (Perciformes: Sphyraenidae) in the eastern Pacific. *Journal of Applied Ichthyology* **2013**, *29*, 655-657, doi:10.1111/jai.12102.

- Goode, G.B.; Bean, T.H. Catalogue of a collection of fishes sent from Pensacola, Florida, and vicinity, by Mr. Silas Stearns, with descriptions of six new species. *Proceedings of the United States National Museum* **1879**, *2*, 121–156.
- Kara, H.; Bourehail, N. First record of the Indo-Pacific yellowtail barracuda, *Sphyræna flavicauda* (Actinopterygii: Perciformes: Sphyrænidae), in the Western Mediterranean. *Acta Ichthyologica et Piscatoria* **2020**, *50*, 363–366, doi:10.3750/aiep/02987.
- Manzoor, H.; Osmany, H.B.; Zohra, K. First record of the Arabian barracuda *Sphyræna arabiansis* Abdussamad & Rethesh, 2015 (Family: Sphyrænidae) from Pakistan. *International Journal of Biology and Biotechnology* **2020**, *17*, 463–468.
- Morishita, S.; Miki, R.; Wada, H.; Itou, M.; Motomura, H. Morphological comparisons of *Sphyræna qenie* with *S. putnamae*, with a revised key to Indo-Pacific species of *Sphyræna* lacking gill rakers (Sphyrænidae). *Ichthyological Research* **2020**, *67*, 456–463, doi:10.1007/s10228-020-00738-6.
- Whitley, G.P. New sharks and fishes from Western Australia. *The Australian Zoologist* **1947**, *11*, 129–150.
- Williams, F. The barracudas (Genus *Sphyræna*) in British East African waters. *Annals and Magazine of Natural History* **1959**, *2*, 92–128, doi:10.1080/00222935908651031.

### Polynemidae

- Motomura, H. A record of a threadfin, *Eleutheronema tetradactylum*, from Aomori Prefecture, northern Japan, and description of a newly-recognized diagnostic character for the species (Perciformes: Polynemidae). *Japanese Journal of Ichthyology* **2001**, *48*, 41–47.
- Motomura, H.; Ito, M.; Takayama, M.; Haraguchi, Y.; Matsunuma, M. Second Japanese Record of a Threadfin, *Eleutheronema rhadinum* (Perciformes, Polynemidae), with Distributional Implications. *Biogeography* **2007**, *9*, 7–11.

### Centrarchiformes

#### Kyphosidae

- Azzurro, E.; Peña-Rivas, L.; Lloris, D.; Bariche, M. First documented occurrence of *Kyphosus incisor* in the Mediterranean Sea. *Marine Biodiversity Records* **2013**, *6*, doi:10.1017/s1755267213000717.
- Canas, A.; Vasconcelos, P.; Lino, P.G.; Santos, M.N. Northernmost record of *Kyphosus sectator* (Osteichthyes: Perciformes: Kyphosidae) in the north-eastern Atlantic. *Journal of the Marine Biological Association of the United Kingdom* **2005**, *85*, 1535–1537, doi:10.1017/S0025315405012750.
- Elbaraasi, H.; Bograra, O.; Elsilini, O.; Bojwari, J. First record of the Bermuda sea chub, *Kyphosus saltatrix* (Actinopterygii: Perciformes: Kyphosidae) in the coastal waters of Libya. *Acta Ichthyologica et Piscatoria* **2013**, *43*, 251–253, doi:10.3750/AIP2013.43.3.09.
- Francour, P.; Mouine, N. First record of *Kyphosus sectator* (Kyphosidae) along the French Mediterranean coast. *Cybio* **2006**, *32*, 275–276.
- Groud, L.L.; Chaoui, L.; Kara, M.H. A new record of the brassy chub, *Kyphosus vaigiensis* (Actinopterygii: Perciformes: Kyphosidae), from the Mediterranean Sea. *Acta Ichthyologica et Piscatoria* **2021**, *51*, 219–223.
- Kiparissis, S.; Loukovitis, D.; Batargias, C. First record of the Bermuda sea chub *Kyphosus saltatrix* (Pisces: Kyphosidae) in Greek waters. *Marine Biodiversity Records* **2012**, *5*, doi:10.1017/s1755267211001199.
- Kiyağa, V.B.; Mavruk, S.; Özyurt, C.E.; Akamca, E.; Coşkun, Ç. Range extension of *Kyphosus vaigiensis* (Quoy & Gaimard, 1825) in the northeastern Mediterranean, İskenderun Bay, Turkey. *Turkish Journal of Zoology* **2019**, *43*, 644–649, doi:10.3906/zoo-1901-1.

- Latridae** Roberts, C.D. A new species of trumpeter (Teleostei; Percomorpha; Latridae) from the central South Pacific Ocean, with a taxonomic review of the striped trumpeter *Latris lineata*. *Journal of the Royal Society of New Zealand* **2003**, 33, 731-754, doi:10.1080/03014223.2003.9517756.
- Terapontidae** Al Mabruk, S.; Zava, B.; Nour, O.M.; Corsini-Foka, M.; Deidun, A. Record of *Terapon jarbua* (Forsskål, 1775) (Terapontidae) and *Acanthopagrus bifasciatus* (Forsskål, 1775) (Sparidae) in the Egyptian Mediterranean waters. *BioInvasions Records* **2021**, 10, 710-720, doi:10.3391/bir.2021.10.3.21.
- Bogorodsky, S.V.; Alpermann, T.J.; Mal, A.O.; Gabr, M.H. Survey of demersal fishes from southern Saudi Arabia, with five new records for the Red Sea. *Zootaxa* **2014**, 3852, 401-437, doi:10.11646/zootaxa.3852.4.1.
- Golani, D.; Appelbaum-Golani, B. First record of the Indo-Pacific fish the Jarbua terapon (*Terapon jarbua*) (Osteichthyes: Terapontidae) in the Mediterranean with remarks on the wide geographical distribution of this species. *Scientia Marina* **2010**, 74, 717-720, doi:10.3989/scimar.2010.74n4717.

### *Cichliformes*

- Daneshvar, E.; Keivany, Y.; Paknehad, E. Comparative Biometry of the Iranian Cichlid, *Iranocichla hormuzensis*, in Different Seasons and Sexes. *Research in Zoology* **2013**, 3, 56–61, doi:10.5923/j.zoology.20130302.02.
- Nyom, A.R.B.; Kitio, H.I.; Njom, S.D.; Pariselle, A.; Snoeks, J.; Bilong, C.F.B. Morphological variations, length-weight relationships and condition factors of *Hemichromis camerounensis* (Cichliformes, Cichlidae) in three lakes in northern Cameroon. *International Journal of Fisheries and Aquaculture* **2021**, 9, 139-145, doi:10.22271/fish.2021.v9.i3b2500.
- Turner, G.F.; Stauffer, J.R. Three new deep water cichlid fishes of the genus *Diplotaxodon* from Lake Malawi, with a redescription of *Diplotaxodon ecclesi*. *Ichthyological Exploration of Freshwaters* **1998**, 8, 239-252.

### *Eupercaria incertae sedis*

#### **Nemipteridae**

- Randall, J.E. Randall's tank photos. Collection of 10,000 large-format photos (slides) of dead fishes. Available online: [www.fishbase.org](http://www.fishbase.org) (see species pages for more details) (accessed on June 29).

#### **Sciaenidae**

- Aydin, M.; Bodur, B. Morphologic Characteristics and Length-Weight Relationships of *Sciaena umbra* (Linnaeus, 1758) in the Black Sea Coast. *Marine Science and Technology Bulletin* **2021**, In Press, 8-15, doi:10.33714/masteb.738661.
- Cengiz, Ö.; Kızılkaya, B.; Paruğ, Ş.Ş. Ege Denizi İçin Eşkına Balığı'nın (*Sciaena umbra* Linnaeus, 1758) Maksimum Boy Kaydı. *Kahramanmaraş Sütçü İmam Üniversitesi Tarım ve Doğa Dergisi* **2019**, 22, 659-663, doi:10.18016/ksutarimdogan.vi.515704.
- Cengiz, O.; Paruğ, S.S. A New Maximum Size Record of the Shi Drum (*Umbrina cirrosa* Linnaeus, 1758) for Aegean Sea. *Brazilian Journal of Biology* **2021**, 81, 461-463, doi:10.1590/1519-6984.231643.
- Harayashiki, C.; Junior, A.S.V.; Burns, M.; Vieira, J.P. Establishing evidence of a non-native species *Pachyurus bonariensis* Steindachner, 1879 (Perciformes, Sciaenidae) in Mirim Lagoon, Rio Grande do Sul (Brazil). *BioInvasions Records* **2014**, 3, 103-110, doi:10.3391/bir.2014.3.2.08.
- Kumar, T.; Chakraborty, S.; Jaiswar, A.; Sandhya, K.; Panda, D. Biometric studies on *Johnnieops sina* (Cuvier, 1830) along Ratnagiri coast of Maharashtra. *Indian Journal of Fisheries* **2012**, 559, 7–13.
- Tokaç, A.; Akyol, O.; Tosunoğlu, Z.; Aydin, C.; Kaykaç, H. Occurrence of a Huge Meagre, *Argyrosomus regius* in İzmir Bay (Aegean Sea, Turkey). *Turkish Journal of Maritime and Marine Sciences* **2017**, 3, 63-66.

Whitley, G.P. New sharks and fishes from Western Australia. *The Australian Zoologist* **1947**, *11*, 129-150.

### *Gobiiformes*

Randall, J.E. Randall's tank photos. Collection of 10,000 large-format photos (slides) of dead fishes.

Available online: [www.fishbase.org](http://www.fishbase.org) (see species pages for more details) (accessed on June 29).

Trkov, D.; Lipej, L. First record of the cryptobenthic goby *Odondebuenia balearica* (Pellegrin & Fage, 1907) in Slovenia. *Mediterranean Marine Science* **2020**, *21*, 350.

### *Istiophoriformes*

#### **Istiophoridae**

Beerkircher, L.R.; Lee, D.; Hinteregger, G.F. Roundscale spearfish *Tetrapturus georgii* (Lowe, 1840); updated morphology, distribution, and relative abundance in the western North Atlantic. *NOAA Technical Memorandum* **2008**, *NFMS-SEFSC-571*, 1-23.

Beerkircher, L.R.; Lee, D.W.; Hinteregger, G.F. Roundscale spearfish *Tetrapturus georgii*: morphology, distribution, and relative abundance in the western North Atlantic. *Bulletin of Marine Science* **2008**, *82*, 155–170.

Conrad, G.M.; LaMonte, F. Observations on the body form of the blue marlin (*Makaira nigricans ampla* Poey). *Bull Am Mus Nat Hist* **1937**, *74*, 207–220.

De La Cruz-Agüero, J.; González-Armas, R.; García-Rodríguez, F.J.; Cota-Gómez, V.M. First record of a specimen of the shortbill spearfish *Tetrapturus angustirostris* Tanaka, 1915 in the Pacific coast of Mexico. *Latin American Journal of Aquatic Research* **2019**, *47*, 677–683, doi:doi:10.3856/vol47-issue4-fulltext-9.

Gregory, W.K.; Conrad, G.M. Body-forms of the black marlin (*Makaira nigricans marlina*) and striped marlin (*Makaira mitsukurii*) of New Zealand and Australia. *Bull Am Mus Nat Hist* **1939**, *76*, 443–456.

Morrow, J.E., Jr. Names of the blue marlin and black marlin. *Bulletin of Marine Science* **1958**, *8*, 356-359.

Nichols, J.T.; LaMonte, F. The Tahitian black swordfish, or silver marlin swordfish. *American Museum Novitaaes* **1935**, *807*, 1-2.

Prager, M.H.; Prince, E.D.; Lee, D.W. Empirical length and weight conversions for blue marlin, white marlin, and sailfish from the North Atlantic Ocean. *Bulletin of Marine Science* **1995**, *56*, 201-210.

Randall, J.E. Randall's tank photos. Collection of 10,000 large-format photos (slides) of dead fishes.

Available online: [www.fishbase.org](http://www.fishbase.org) (see species pages for more details) (accessed on June 29).

Robins, C.R. Summer concentration of white marlin, *Tetrapturus albidus*, west of the straits of Gibraltar. In *Proceedings of the international billfish symposium Kailua-Kona, Hawaii, 9-12 August 1972. Part 2. Review and Contributed Papers*, Shomura, S., Williams, F., Eds.; National Oceanic and Atmospheric Administration, NOAA Technical Report NMFS SSRF-675: 1974; pp. 164-174.

Robins, C.R.; de Sylva, D.P. Description and Relationships of the Longbill Spearfish, *Tetrapturus belone*, Based on Western North Atlantic Specimens. *Bulletin of Marine Science* **1960**, *10*, 383–413.

Robins, C.R.; De Sylva, D.P. A new western Atlantic spearfish, *Tetrapturus pfluegeri*, with a redescription of the Mediterranean spearfish *Tetrapturus belone*. *Bulletin of Marine Science of the Gulf and Caribbean* **1963**, *13*, 85–122.

Velayudham, R.; Veeramuthu, S.; Kesavan, K. Length-weight relationship and morphometrics of the sailfish, *Istiophorus platypterus* (Shaw & Nodder) from Parangipettai, Southeast coast of India. *Asian Pacific Journal of Tropical Biomedicine* **2012**, *2*, S373–S376.

#### **Xiphiidae**

- Gregory, W.K.; Conrad, G.M. The comparative osteology of the swordfish (*Xiphias*) and the sailfish (*Istiophorus*). *Am Mus Novitates* **1937**, 952, 1-25.
- Quigley, D.; Flannery, K. Swordfish *Xiphias gladius* (L.). *The Irish Naturalists' Journal* **1989**, 23, 116–116.
- Raven, H.C.; LaMonte, F. Notes on the alimentary tract of the swordfish (*Xiphias gladius*). *Am Mus Novitates* **1937**, 902, 1–13.
- Taylor, R.G.; Murphy, M.D. Reproductive biology of the swordfish *Xiphias gladius* in the Straits of Florida and adjacent waters. *Fishery Bulletin* **1992**, 90, 809-816.

#### *Labriformes*

- Rafrafi-Nouira, S.; Boumaïza, M.; Reynaud, C.; Capapé, C. Confirmed occurrence of cuckoo wrasse *Labrus mixtus* (Osteichthyes: Labridae) in Tunisian waters (central Mediterranean). *Annales: Series Historia Naturalis* **2012**, 22, 115–120.

#### **Labridae**

- Randall, J.E. Randall's tank photos. Collection of 10,000 large-format photos (slides) of dead fishes. Available online: [www.fishbase.org](http://www.fishbase.org) (see species pages for more details) (accessed on June 29).

#### **Scaridae**

- Kampouris, T.E.; Batjakas, I.E. The northernmost record of the thermophilic Mediterranean parrotfish *Sparisoma cretense* (Linnaeus, 1758) (Perciformes, Scaridae) in the eastern Mediterranean Sea (northwestern Aegean Sea). *Annales, Series historia naturalis* **2018**, 28, 111-116, doi:10.19233/ASHN.2018.13.
- Ogihara, G.; Yoshida, T.; Ito, M.; Yamashita, M.; Sakurai, Y.; Motomura, H. Record of *Bolbometopon muricatum* (Labroidei: Scaridae) from Kasasa, Kagoshima, southern Kyushu, Japan. *Nature of Kagoshima* **2010**, 36, 43-47.
- Randall, J.E.; Earle, J.L. *Scarus obishime*, a new parrotfish (Perciformes: Scaridae) from the Ogasawara Islands. *Japanese Journal of Ichthyology* **1993**, 39, 287-293.
- Westneat, M.W.; Satapoomin, U.; Randall, J.E. *Scarus maculipinna*, a new species of parrotfish (Perciformes, Scaridae) from the eastern Indian Ocean. *Zootaxa* **2007**, 1628, 59-68, doi:10.11646/zootaxa.1628.1.4.

#### *Lutjaniformes*

#### **Lutjanidae**

- Bos, A.R.; Gumanao, G.S. Seven new records of fish (Teleostei: Perciformes) from coral reefs and pelagic habitats in southern Mindanao, the Philippines. *Marine Biodiversity Records* **2013**, 6, e95, doi:10.1017/S1755267213000614.
- García-Mederos, A.M.; Tuset, V.M. First record of African brown snapper *Lutjanus dentatus* in the Canary Islands (north-eastern Atlantic Ocean). *Marine Biodiversity Records* **2014**, 7, e65, doi:10.1017/S1755267214000682.
- Goode, G.B.; Bean, T.H. Description of two new species of fishes, *Lutjanus blackfordii* and *Lutjanus stearnsii*, from the coast of Florida. *Proceedings of the United States National Museum* **1878**, 1, 176–181, doi:<https://doi.org/10.5479/si.00963801.1-24.176>.
- Goode, G.B.; Bean, T.H. Catalogue of a collection of fishes sent from Pensacola, Florida, and vicinity, by Mr. Silas Stearns, with descriptions of six new species. *Proceedings of the United States National Museum* **1879**, 2, 121–156.
- Hata, H.; Haraguchi, Y.; Motomura, H. First record of *Etelis radiosus* (Perciformes: Lutjanidae) from the Tokara Islands in the Ryukyu Islands, southern Japan. *Nature of Kagoshima* **2015**, 41, 95-99.



Kim, M.J.; Mun, T.S.; Lee, J.-H.; Choi, Y.M.; Song, C.B. New Record of the Chinamanfish, *Symphorus nematophorus* (Perciformes: Lutjanidae) from Korea. *Korean Journal of Ichthyology* **2015**, *27*, 149-152.

Schwartz, F.J. Recent Occurrences of Cubera Snappers (Pisces, Lutjanidae) in North Carolina Atlantic Ocean Waters. *Journal of the Elisha Mitchell Scientific Society* **1972**, *88*, 252–254.

#### *Mugiliformes*

##### **Mugilidae**

Randall, J.E. Randall's tank photos. Collection of 10,000 large-format photos (slides) of dead fishes. Available online: [www.fishbase.org](http://www.fishbase.org) (see species pages for more details) (accessed on June 29).

#### *Ophidiiformes*

##### **Ophidiidae**

Pan, M.; Ouréns, R.; Dione, L.; Samba, I.; Sánchez-Carnero, N.; Freire, J. Length-weight relationships for 13 fish species from a coastal artisanal fishery at Cape Verde peninsula (Senegal). *Journal of Applied Ichthyology* **2015**, *31*, 1177-1179, doi:10.1111/jai.12890.

#### *Ovalentaria incertae sedis*

##### **Ambassidae**

Randall, J.E. Randall's tank photos. Collection of 10,000 large-format photos (slides) of dead fishes. Available online: [www.fishbase.org](http://www.fishbase.org) (see species pages for more details) (accessed on June 29).

##### **Pseudochromidae**

Randall, J.E. Randall's tank photos. Collection of 10,000 large-format photos (slides) of dead fishes. Available online: [www.fishbase.org](http://www.fishbase.org) (see species pages for more details) (accessed on June 29).

#### *Pempheriformes*

##### **Champsodontidae**

Bogorodsky, S.V.; Alpermann, T.J.; Mal, A.O.; Gabr, M.H. Survey of demersal fishes from southern Saudi Arabia, with five new records for the Red Sea. *Zootaxa* **2014**, *3852*, 401-437, doi:10.11646/zootaxa.3852.4.1.

Yapici, S.; Karachle, P.K.; Filiz, H. First length-weight relationships of 11 fish species in the Aegean Sea. *Journal of Applied Ichthyology* **2015**, *31*, 398-402, doi:10.1111/jai.12459.

#### *Perciformes*

##### **Acropomatidae**

Carvalho-Filho, A.; Marcovaldi, G.; Sampaio, C.A.; Paiva, M.I.G.; Duarte, I. Two new records of uncommon deep-sea perciform fishes from the Southwestern Atlantic. *Zootaxa* **2010**, *2694*, 59-68.

##### **Centropomidae**

Pinho, S.M.; David, L.H.; Garcia, F.; Keesman, K.J.; Portella, M.C.; Goddek, S. South American fish species suitable for aquaponics: a review. *Aquaculture International* **2021**, *29*, 1427-1449, doi:10.1007/s10499-021-00674-w.

##### **Channichthyidae**

La Mesa, M.; Vacchi, M.; Iwami, T.; Eastman, J. Taxonomic studies of the Antarctic icefish genus *Cryodraco* Dollo, 1900 (Notothenioidei: Channichthyidae). *Polar Biology* **2002**, *25*, 384-390, doi:10.1007/s00300-002-0358-y.

### **Emmelichthyidae**

Yoshino, T.; Kon, T. First record of an emmelichthyid fish, *Emmelichthys karnellai*, from the Western North Pacific (Pisces: Perciformes: Emmelichthyidae). *Biogeography* **2000**, *2*, 63-65.

### **Lobotidae**

Daban, İ.B.; Cabbar, K. New Occurrence of Atlantic Tripletail, *Lobotes surinamensis* (Bloch, 1790) from the Turkish Part of the Aegean Sea, with Biological Notes. *Acta Aquatica Turcica* **2021**, *17*, 327-333, doi:10.22392/actaquatr.814774.

Soufi-Kechaou, E.; Ounifi-Ben Amour, K.; Ben Souissi, J.; Rafrafi-Nouira, S. Additional record of tripletail *Lobotes surinamensis* (Osteichthyes: Lobotidae) in Tunisian waters (central Mediterranean Sea). *Annales, Series historia naturalis* **2018**, *28*, 37-42, doi:10.19233/ASHN.2018.06.

### **Haemulidae**

Al-Busaidi, H.K.; Govender, A.; Al-Jufaily, S.M.; Al-Marzouqi, A. Population Biology Including Population Structure, Spawning Cycle, and Maturity of *Plectorhinchus schotaf* (Forsskal, 1775) (Family: Haemulidae) Collected from the Arabian Sea Coast of Oman. In *The Arabian Seas: Biodiversity, Environmental Challenges and Conservation Measures*, Jawad, L.A., Ed.; Springer International Publishing: Cham, 2021; pp. 595-624.

Baset, A.; Liu, Q.; Liao, B.; Waris, A.; Ahmad, I.; Yanan, H.; Qingqing, Z. Population Dynamics of Saddle Grunt Fish, *Pomadasys maculatus* (Bloch, 1793) from Pakistani Waters. *Bioprocess Engineering* **2020**, *4*, doi:10.11648/j.be.20200401.11.

Bogorodsky, S.V.; Alpermann, T.J.; Mal, A.O.; Gabr, M.H. Survey of demersal fishes from southern Saudi Arabia, with five new records for the Red Sea. *Zootaxa* **2014**, *3852*, 401-437, doi:10.11646/zootaxa.3852.4.1.

Hata, H.; Fujiwara, K.; Takayama, M.; Motomura, H. First records of *Plectorhinchus schotaf* (Perciformes: Haemulidae) from Kagoshima Prefecture, southern Japan. *Nature of Kagoshima* **2014**, *40*, 53-57.

Randall, J.E. Randall's tank photos. Collection of 10,000 large-format photos (slides) of dead fishes. Available online: [www.fishbase.org](http://www.fishbase.org) (see species pages for more details) (accessed on June 29).

Safi, A.; Khan, M.A.; Khan, M.Z. Study of some morphometric and meristic characters of saddle grunt fish, *Pomadasys maculatus* (Bloch, 1793), off Karachi Coast, Pakistan. *American Journal of Marine Science* **2014**, *2*, 38-42, doi:10.12691/marine-2-2-2.

Safi, A.; Khan, M.A.; Khan, M.Z. Study of some morphometric and meristic characters of striped piggy fish, *Pomadasys stridens* (Forsskal, 1775) from Karachi Coast, Pakistan. *The Journal of Zoology Studies* **2014**, *1*, 1-6.

### **Malacanthidae**

Goode, G.B.; Bean, T.H. Description of *Caulolatilus microps*, a new species of fish from the Gulf coast of Florida. *Proceedings of the United States National Museum* **1878**, *1*, 42-45, doi:<https://doi.org/10.5479/si.00963801.1-16.42>.

Goode, G.B.; Bean, T.H. Description of a new genus and species of fish, *Lopholatilus chamaeleonticeps*, from the south coast of New England. *Proceedings of the United States National Museum* **1879**, *2*, 205-209.

Pulver, J.R.; Whatley, A. Length-weight relationships, location, and depth distributions for select Gulf of Mexico reef fish species. *NOAA Technical Memorandum* **2016**, NMFS-SEFSC-693, 1-100, doi:10.7289/V58G8HQ2.



### **Moronidae**

Meads, D.R.; Crawford, M.K.; Dockendorf, K.J. Predicting Weights of Striped Bass *Morone saxatilis* in the Roanoke River, North Carolina. *Journal of North Carolina Academy of Science* **2011**, *127*, 216-218, doi:10.7572/2167-5880-127.3.216.

### **Mullidae**

Azzouz, K.; Diatta, Y.; Mansour, S.; Boumaïza, M.; Ben Amor, M.M.; Capapé, C. First record of the west African goatfish, *Pseudupeneus prayensis* (Actinopterygii: Perciformes: Mullidae), off the Tunisian coast (central Mediterranean). *Acta Ichthyologica Et Piscatoria* **2011**, *41*, 133-136, doi:10.3750/aip2011.41.2.10.

Bariche, M.; Bilecenoglu, M.; Azzurro, E. Confirmed presence of the Red Sea goatfish *Parupeneus forsskali* (Fourmanoir & Guézé, 1976) in the Mediterranean Sea. *BioInvasions Records* **2013**, *2*, 173-175, doi:10.3391/bir.2013.2.2.15.

Mehanna, S.F.; Osman, A.G.M.; Farrag, M.M.S.; Osman, Y.A.A. Age and growth of three common species of goatfish exploited by artisanal fishery in Hurghada fishing area, Egypt. *Journal of Applied Ichthyology* **2018**, *34*, 917-921, doi:10.1111/jai.13590.

### **Pinguipedidae**

Bogorodsky, S.V.; Alpermann, T.J.; Mal, A.O.; Gabr, M.H. Survey of demersal fishes from southern Saudi Arabia, with five new records for the Red Sea. *Zootaxa* **2014**, *3852*, 401-437, doi:10.11646/zootaxa.3852.4.1.

### **Pomacanthidae**

Capapé, C.; Ali, M.; Ali, A.; Esmail, A. Second Mediterranean record of Emperor angelfish, *Pomacanthus imperator* (Osteichthyes: Pomacanthidae), and first record from the Syrian coast. *Cahiers de Biologie Marine* **2018**, *59*, 396-397, doi:10.21411/CBM.A.8C69C609.

Golani, D.; Salameh, P.; Sonin, O. First record of the Emperor angelfish, *Pomacanthus imperator* (Teleostei: Pomacanthidae) and the second record of the spotbase burrfish *Cyclichthys spilostylus* (Teleostei: Diodontidae) in the Mediterranean. *Aquatic Invasions* **2010**, *5*, S41-S43, doi:10.3391/ai.2010.5.S1.010.

Randall, J.E. Randall's tank photos. Collection of 10,000 large-format photos (slides) of dead fishes. Available online: [www.fishbase.org](http://www.fishbase.org) (see species pages for more details) (accessed on June 29).

### **Serranidae**

Bos, A.R.; Gumanao, G.S. Seven new records of fish (Teleostei: Perciformes) from coral reefs and pelagic habitats in southern Mindanao, the Philippines. *Marine Biodiversity Records* **2013**, *6*, e95, doi:10.1017/S1755267213000614.

Bullock, L.H.; Murphy, M.D.; Godcharles, M.F.; Mitchell, M.E. Age, growth, and reproduction of jewfish *Epinephelus itajara* in the eastern Gulf of Mexico. *Fishery Bulletin* **1992**, *90*, 243-249.

Francesconi, J.J.; Schwartz, F.J. Jewfish, *Epinephelus itajara*, from North Carolina, with range correction and body comparisons. *Journal of the Elisha Mitchell Scientific Society* **2000**, *116*, 167-170.

Gökoğlu, M.; Özvarol, Y. *Epinephelus coioides* (Actinopterygii: Perciformes: Serranidae)—a new Lessepsian migrant in the Mediterranean coast of Turkey. *Acta Ichthyologica et Piscatoria* **2015**, *45*, 307-309, doi:10.3750/aip2015.45.3.09.

Goode, G.B.; Bean, T.H. A note upon the black grouper (*Epinephelus nigritus* (Holbrook) Gill) of the southern coast. *Proceedings of the United States National Museum* **1878**, *1*, 182-184, doi:<https://doi.org/10.5479/si.00963801.1-26.182>.

- Goode, G.B.; Bean, T.H. Catalogue of a collection of fishes sent from Pensacola, Florida, and vicinity, by Mr. Silas Stearns, with descriptions of six new species. *Proceedings of the United States National Museum* **1879**, *2*, 121–156.
- Kulbicki, M.; Guillemot, N.; Amand, M. A general approach to length-weight relationships for New Caledonian lagoon fishes. *Cybium* **2005**, *29*, 232–252.
- Nakamura, J.; Motomura, H. Review of all Japanese species and standard Japanese names of families, subfamilies, and genera, previously included in the family Serranidae sensu Johnson (1983). *Ichthy, Natural History of Fishes of Japan* **2022**, *19*, 26–43.
- Randall, J.E. Randall's tank photos. Collection of 10,000 large-format photos (slides) of dead fishes. Available online: [www.fishbase.org](http://www.fishbase.org) (see species pages for more details) (accessed on June 29).
- Smith, C.L. A revision of the American groupers : *Epinephelus* and allied genera. *Bull Am Mus Nat Hist* **1971**, *146*.
- Surendiran, B.; Haq, M.B.; Meetei, K.B.; Karuppasamy, K. Report on Rare Occurrence of Queensland Grouper, *Ephinephelus Lanceolatus*, (Bloch, 1790) From Cuddalore Waters, South East Coast Of India. *International Journal of Future Generation Communication Networking* **2020**, *13*, 3983–3990.
- Thomas, S.; Sreeram, M.P.; George, R.M.; Naomi, T.S.; Sanil, N.K. First record of occurrence of Boulenger's anthias *Sacura boulengeri* (Heemstra, 1973), Family: Serranidae, in Indian waters. *Journal of the Marine Biological Association of India* **2008**, *50*, 69–73.

### Siganidae

- Dulčić, J.; Dragičević, B.; Grgičević, R.; Lipej, L. First substantiated record of a Lessepsian migrant—the dusky spinefoot, *Siganus luridus* (Actinopterygii: Perciformes: Siganidae), in the Adriatic Sea. *Acta Ichthyologica Et Piscatoria* **2011**, *41*, 141–143, doi:10.3750/aip2011.41.2.12.
- Rafrafi-Nouira, S.; Boumaïza, M.; Reynaud, C.; Capape, C. Additional records of Lessepsian teleost species off the Tunisian coast (central Mediterranean). *Annales, Series Historia Naturalis* **2012**, *22*, 55–62.
- Soykan, O.; Gülşahin, A.; Cerim, H. Maximum size of Marbled spinefoot (*Siganus rivulatus* Forsskal & Niebuhr, 1775) for Aegean Sea. *Aquatic Sciences and Engineering* **2020**, *36*, 42–45, doi:10.26650/ase2020727909.

### Sillagidae

- Innal, D.; Kisin, B.; Akdoganbulut, D. Length-weight Relationships and Morphometry of *Sillago suezensis* from Antalya Gulf-Turkey *International Journal of Fisheries and Aquatic Studies* **2015**, *2*, 107–112.
- Kulbicki, M.; Guillemot, N.; Amand, M. A general approach to length-weight relationships for New Caledonian lagoon fishes. *Cybium* **2005**, *29*, 232–252.
- Pradhan, S.K.; Roul, S.K.; Ghosh, S.; Tripathy, P.; Jaiswar, A.K.; Bhusan, S.; Nayak, B.B. Biometry, length-weight and length-length relationships of flathead sillago *Sillaginopsis panijus* (Hamilton, 1822) (Perciformes: Sillaginidae) from the north-western Bay of Bengal. *Indian Journal of Fisheries* **2020**, *67*, 144–151, doi:10.21077/ijf.2020.67.3.95369-16.
- Randall, J.E. Randall's tank photos. Collection of 10,000 large-format photos (slides) of dead fishes. Available online: [www.fishbase.org](http://www.fishbase.org) (see species pages for more details) (accessed on June 29).

### *Pleuronectiformes*

- Goode, G.B.; Bean, T.H. Catalogue of a collection of fishes sent from Pensacola, Florida, and vicinity, by Mr. Silas Stearns, with descriptions of six new species. *Proceedings of the United States National Museum* **1879**, *2*, 121–156.

Randall, J.E. Randall's tank photos. Collection of 10,000 large-format photos (slides) of dead fishes.  
Available online: [www.fishbase.org](http://www.fishbase.org) (see species pages for more details) (accessed on June 29).

### *Priacanthiformes*

- Alshawy, F.A.; Ibrahim, A.; Hussein, C.; Lahlah, M. First record of arrow bulleye, *Priacanthus sagittarius* Starnes, 1988 from the Syrian marine waters (Eastern Mediterranean). *FishTaxa* **2019**, *4*, 21–24.
- Gökoğlu, M.; Teker, S. Spread of the arrow bulleye *Priacanthus sagittarius* Starnes, 1988 in the Mediterranean Sea. *Acta Aquatica: Aquatic Sciences Journal* **2018**, *5*, 1–3.
- Jeong, B.; Motomura, H. First records of *Priacanthus zaiserae* (Perciformes: Priacanthidae) from Amami-oshima island, Kagoshima Prefecture, Japan. *Nature of Kagoshima* **2014**, *40*, 43–46.

### *Kurtiformes*

#### **Apogonidae**

- Bogorodsky, S.V.; Alpermann, T.J.; Mal, A.O.; Gabr, M.H. Survey of demersal fishes from southern Saudi Arabia, with five new records for the Red Sea. *Zootaxa* **2014**, *3852*, 401–437, doi:10.11646/zootaxa.3852.4.1.
- Kebapçioğlu, T.; Beğburs, C.R. Distributions and Length-Weight Relationships of Some Lessepsian Cardinalfishes (Apogonid species) in the Northeastern Mediterranean (Antalya, Turkey). *Acta Aquatica Turcica* **2020**, *17*, 72–77, doi:10.22392/actaquatr.755915.
- Said Koya, K.P.; Akhilesh, K.V.; Bineesh, K.K. A new record of Titan cardinalfish, *Holapogon maximus* (Apogonidae) along the south-west coast of India. *Marine Biodiversity Records* **2011**, *4*, e36, doi:10.1017/s1755267211000340.

### *Scombriformes*

#### **Bramidae**

- Ali, A.M.; McNoon, A.H. Additions to Benthopelagic Fish Fauna of the Aden Gulf-Arabian Sea (Actinopterygii: Bramidae and Sternoptychidae). *Journal of Fisheries and Aquatic Science* **2010**, *5*, 23–32, doi:10.3923/jfas.2010.23.32.
- Bos, A.R.; Gumanao, G.S. Seven new records of fish (Teleostei: Perciformes) from coral reefs and pelagic habitats in southern Mindanao, the Philippines. *Marine Biodiversity Records* **2013**, *6*, e95, doi:10.1017/S1755267213000614.
- Carvalho-Filho, A.; Marcovaldi, G.; Sampaio, C.A.; Paiva, M.I.G.; Duarte, L.A.G. First report of rare pomfrets (Teleostei: Bramidae) from Brazilian waters, with a key to Western Atlantic species. *Zootaxa* **2009**, *2290*, 1–26.
- Jawad, L.A.; Al-Mamry, J.; Al-Busaidi, H.K. New Record of the Keeltail Pomfret, *Taractes rubescens* (Jordan & Evermann, 1887) (Perciformes: Bramidae) from the Sea of Oman. *International Journal of Marine Science* **2014**, *4*, 227–230, doi:10.5376/ijms.2014.04.0025.
- Lee, J.-H.; Lee, W.-J.; Kim, J.-K. First Reliable Record of the Keeltail Pomfret *Taractes rubescens* (Bramidae: Perciformes) from Korea. *Korean Journal of Fisheries and Aquatic Sciences* **2019**, *52*, 283–287, doi:10.5657/KFAS.2019.0283.
- Mytilineou, C.; Anastasopoulou, A.; Christides, G.; Bekas, P.; Smith, C.J.; Papadopoulou, K.N.; Lefkaditou, E.; Kavadas, S. New records of rare deep-water fish species in the Eastern Ionian Sea (Mediterranean Sea). *Journal of Natural History* **2013**, *47*, 1645–1662, doi:10.1080/00222933.2013.775372.
- Puentes, V.; Rubio, E.A.; Zapata, L.A. Primer registro del género *Taractes* (Pisces: Bramidae) en el océano Pacífico colombiano. *Boletín de Investigaciones Marinas y Costeras-INVEMAR* **2001**, *30*, 207–212.

#### **Centrolophidae**

- Akyol, O.; Özgül, A. A new record of imperial blackfish, *Schedophilus ovalis* (Cuvier, 1833) from the Bay of Izmir (Aegean Sea, Turkey). *Journal of the B* **2018**, *24*, 277-280.
- Ayas, D.; Erguden, D.; Çiftçi, N.; Bakan, M. The New Locality Record of *Centrolophus niger* (Gmelin, 1789), from Büyükeceli Coast (North-Eastern Mediterranean Sea). *Comu Journal of Marine Science and Fisheries* **2018**, *1*, 48-52.
- Mackay, K.T. Further Records of the Stromateoid Fish *Centrolophus niger* from the Northwestern Atlantic, with Comments on Body Proportions and Behavior. *Copeia* **1972**, *1972*, 185-187, doi:10.2307/1442800.
- Merriner, J.V.; Foster, W.A.; Schwartz, F.J. The Barrelfish, *Hyperoglyphe perciformis* (Pisces: Stromateidae), in Pamlico Sound, N. C., and Adjacent Atlantic Ocean. *Journal of the Elisha Mitchell Scientific Society* **1970**, *86*, 28–30.
- Mytilineou, C.; Anastasopoulou, A.; Christides, G.; Bekas, P.; Smith, C.J.; Papadopoulou, K.N.; Lefkaditou, E.; Kavadas, S. New records of rare deep-water fish species in the Eastern Ionian Sea (Mediterranean Sea). *Journal of Natural History* **2013**, *47*, 1645-1662, doi:10.1080/00222933.2013.775372.
- Reyes, P.; Hüne, M.; Rui, V.H. El pez mesopelagico *Centrolophus niger* (Gmelin, 1789) (Pisces: Perciformes) y su hallazgo en aguas del talud continental chileno situadas sobre la placa sudamericana. *Gayana* **2007**, *71*, 96-101, doi:10.4067/S0717-65382007000100010

#### **Icosteidae**

- Allen, G.H. The Ragfish, *Icosteus aenigmaticus* Lockington, 1880: A Synthesis of Historical and Recent Records From the North Pacific Ocean and the Bering Sea. *Marine Fisheries Review* **2001**, *63*, 1-31.
- Kubota, T.; Uyeno, T. First record of an adult specimen of ragfish *Icosteus aenigmaticus* from Japan. *Japanese Journal of Ichthyology* **1971**, *18*, 51–54.

#### **Thunnini**

- Adams, J.L.; Kerstetter, D.W. Age and Growth of Three Coastal-Pelagic Tunas (Actinopterygii: Perciformes: Scombridae) in the Florida Straits, USA: Blackfin Tuna, *Thunnus atlanticus*, Little Tunny, *Euthynnus alletteratus*, and Skipjack Tuna, *Katsuwonus pelamis*. *Acta Ichthyologica et Piscatoria* **2014**, *3*.
- Allaya, H.; Faleh, A.B.; Rebaya, M.; Zrelli, S.; Hattour, A.; Quignard, J.-P.; Trabelsi, M. Morphological differences Between two populations of the Little Tunny, *Euthynnus alletteratus* (Rafinesque, 1810) in Tunisian Waters (Central Mediterranean Sea). *Pakistan Journal of Zoology* **2017**, *49*, 2027–2035, doi:10.17582/journal.pjz/2017.49.6.2027.2035.
- Allaya, H.; Faleh, A.B.; Zrelli, S.; Hajjej, G.; Hattour, A.; Quignard, J.-P.; Trabelsi, M. Morphological variation of bullet tuna *Auxis rochei* (Risso, 1810) from Tunisian Waters. *Acta Zoologica Bulgarica* **2016**, *68*, 433–442.
- Bullis, H.R., Jr.; Mather, F.J., III. Tunas of the genus *Thunnus* of the northern Caribbean. *Am Mus Novitates* **1956**, *1765*, 1–12.
- Collete, B.B.; Chao, L.N. Systematics And Morphology Of Bonitos (*Sarda*) And Their Relatives (Scombridae, Sardini) *Fishery Bulletin* **1975**, *73*, 516-625.
- Collette, B.B.; Díaz de Astarloa, J.M. Southernmost occurrence of the slender tuna, *Allothunnus fallai*, off Tierra del Fuego, South Atlantic Ocean. *Ichthyological Research* **2008**, *55*, 95–96, doi:10.1007/s10228-008-0036-3.
- Insacco, G.; Zava, B. New record of *Orcynopsis unicolor* (Geoffroy Saint Hilaire, 1817) in Italian waters. *Mediterranean Marine Science* **2020**, *21*, 344-345.

- Olsen, A.M. *Allothunnus fallai* Serventy-A new record for Australian waters. *Papers and Proceedings of the Royal Society of Tasmania* **1962**, 96, 95–96.
- Rivas, L.R. A comparison between giant bluefin tuna (*Thunnus thynnus*) from the Straits of Florida and the Gulf of Maine, with reference to migration and population identity. *Proceedings of the Gulf and Caribbean Fisheries Institute Seventh Annual Session* **1955**, 133–149.
- Roberts, P.E.; Eggleston, D.; James, G.D. Frigate tuna *Auxis thazard* in New Zealand waters. *New Zealand Journal of Marine and Freshwater Research* **1977**, 11, 163–167.
- Romeo, J.; Mansueti, A.J. Little Tuna, *Euthynnus alletteratus*, in Northern Chesapeake Bay, Maryland, with an Illustration of Its Skeleton. *Chesapeake Science* **1962**, 3, 257–263, doi:10.2307/1350633.
- Russell, F.S. Tunny Investigations made in the North Sea on Col. E. T. Peel's Yacht, "St. George," Summer, 1933. Part I. Biometric Data. *Journal of the Marine Biological Association of the United Kingdom* **1934**, 19, 503–522, doi:10.1017/S0025315400046592.
- Tičina, V.; Grubišić, L.; Šegvić Bubić, T.; Katavić, I. Biometric characteristics of small Atlantic bluefin tuna (*Thunnus thynnus*, Linnaeus, 1758) of Mediterranean Sea origin. *Journal of Applied Ichthyology* **2011**, 27, 971–976, doi:https://doi.org/10.1111/j.1439-0426.2011.01752.x.
- Wolfe, D.C.; Webb, B.F. Slender tuna (*Allothunnus fallai* Serventy): First record of bulk catches, Tasmania, 1974. *Australian Journal of Marine and Freshwater Research* **1975**, 26, 213–221.
- Zaki, S.; Al-Mamary, J.; Al-Marzouqi, A.A.; Al-Kharusi, L. First record of the Pacific bluefin tuna *Thunnus orientalis* (Temminck & Schlegel, 1844) from the coast off Sur, Sultanate of Oman. *International Journal of Environment, Agriculture and Biotechnology* **2017**, 2, 1752–1757, doi:10.22161/ijeab/2.4.36.

#### **Non-Thunnin Scombridae**

- Beaumarrige, D.S. Age, growth, and reproduction of king mackerel, *Scomberomorus cavalla*, in Florida. *Florida Marine Research Publications* **1973**, 1, 1–45.
- Butz, G.; Mansueti, R.J. First record of the King Mackerel, *Scomberomorus cavalla*, in Northern Chesapeake Bay, Maryland. *Chesapeake Science* **1962**, 3, 130–135, doi:10.2307/1351227.
- Cengiz, Ö. The maximum length record of Atlantic Mackerel (*Scomber scombrus* Linnaeus, 1758) for Turkish Seas. *Marine and Life Sciences* **2020**, 2, 65–70.
- Collette, B.B.; Russo, J.L. *Scomberomorus munroi*, a new species of Spanish mackerel from Australia and New Guinea. *Marine and Freshwater Research* **1980**, 31, 241–250.
- Conrad, G.M.; LaMonte, F. Observations on the body form of the blue marlin (*Makaira nigricans ampla* Poey). *Bull Am Mus Nat Hist* **1937**, 74, 207–220.
- Gnanamuttu, J.C. On the occurrence of *Rastrelliger faughni* Matsui in the Indian Waters. *Indian Journal of Fisheries* **1971**, 1–2, 170–173.
- Goutham, J.; Mohanraju, R. Some aspects of mackerel diversity and morphometric studies of *Rastrelliger* genera from Port Blair Andaman waters. *International Journal of Fisheries and Aquatic Studies* **2015**, 3, 196–198.
- Hogwarth, W.T. Life history aspects of the wahoo *Acanthocybium solandri* (Cuvier and Valenciennes) from the coast of North Carolina. North Carolina State University, Raleigh, 1976.
- Lheknim, V. First record of double-lined mackerel *Grammatorcynus bilineatus* (Rüppell, 1836) from the Gulf of Thailand. *Phuket Marine Biological Center Research Bulletin* **2019**, 76, 19–23.
- Randall, J.E. Randall's tank photos. Collection of 10,000 large-format photos (slides) of dead fishes. Available online: [www.fishbase.org](http://www.fishbase.org) (see species pages for more details) (accessed on June 29).
- Rao, K.N. A short account of the wahoo, *Acanthocybium solandri* (Cuvier & Valenciennes). *Journal of the Marine Biological Association of India* **1960**, 2, 132–135.

- Romeo, T.; Azzuro, E.; Mostarda, E. Record of *Acanthocybium solandri* in the central Mediterranean sea, with notes on parasites. *Journal of the Marine Biological Association of the United Kingdom* **2005**, *85*, 1295-1296, doi:10.1017/S0025315405012464.
- Rotundo, M.M.; Júnior, T.V.; Albert, D.M.; Doria, V.S. Report of the butterfly kingfish, *Gasterochisma melampus* (Scombridae: Gasterochismatinae) in southeastern Brazil. *Pan-American Journal of Aquatic Sciences* **2015**, *10*, 293–296.
- Santos, S.R.; Nunan, G.W. A record of the Southern Ocean *Gasterochisma melampus* (Teleostei: Scombridae) in the tropical south-western Atlantic, with comments on previous records. *Marine Biodiversity Records* **2015**, *8*, doi:10.1017/s1755267214001158.
- Xu, H.L.; Gu, D.X.; Wang, R.; Sun, J.H.; Bai, D.Q. Length-weight and length-length relationships of eight fish species from Bohai Bay, China. *Journal of Applied Ichthyology* **2017**, *33*, 642-644, doi:10.1111/jai.13337.
- Zorica, B.; Sinovčić, G. Biometry, length-length and length-weight relationships of juveniles and adults of Atlantic bonito, *Sarda sarda*, in the eastern Middle Adriatic Sea. *Acta Adriatica: International Journal of Marine Sciences* **2008**, *49*, 65-72.

### Pomatomidae

Virginia Institute of Science. Picture of adult bluefish on chesapeakebay.net. Available online: <https://www.chesapeakebay.net/discover/field-guide/entry/bluefish> (accessed on August 21).

### Gempylidae

- Acarli, D.; Altınağaç, U.; Özekinci, U.; Bayhan, B. The first record of the oilfish Cocco, 1833 (Pisces: Gempylidae) from the Sea of Marmara, Turkey. *Oceanological and Hydrobiological Studies* **2017**, *46*, 249–252, doi:10.1515/ohs-2017-0026.
- Bartlett, M.R.; Backus, R.H. A Catch of the Rare Gempylid *Lepidocybium flavo-brunneum* (Smith) in the Bahamas. *Copeia* **1962**, *1962*, 845-847, doi:10.2307/1440696.
- Ben Amor, M.M.; Ounifi-Ben Amour, K.; Bdioui, M.; Capape, C. The second record of oilfish, *Ruvettus pretiosus* (Gempylidae), in Tunisian waters (central Mediterranean sea). *Annales, Series historia naturalis* **2021**, *31*, 211-216, doi:10.19233/ASHN.2021.25.
- Bettoso, N.; Dulčić, J. First record of the oilfish *Ruvettus pretiosus* (Pisces: Gempylidae) in the northern Adriatic sea. *Journal of the Marine Biological Association of the United Kingdom* **1999**, *79*, 1145-1149.
- Gómez-Cubillos, M.C.; Grijalba-Bendeck, M. Presence of *Ruvettus pretiosus* (Gempylidae) in the Colombian continental Caribbean. *Universitas Scientiarum* **2016**, *21*, doi:10.11144/Javeriana.SC21-1.porp.
- Hata, H.; Motomura, H. First record of the snake mackerel *Epinnula magistralis* (Perciformes: Gempylidae) from the Tokara Islands, Japan. *Fauna Ryukyuana* **2017**, *30*, 11-15.
- Ho, H.C.; Motomura, H.; Hata, H.; Jiang, W.C. Review of the fish genus *Epinnula* Poey (Perciformes: Gempylidae), with description of a new species from the Pacific Ocean. *Zootaxa* **2017**, *4363*, 393-408, doi:10.11646/zootaxa.4363.3.5.
- Kim, M.J.; Choi, J.H.; Kim, J.N.; Oh, T.Y.; Lee, D.W. First Record of the Black Snoek *Thyrsitoides marleyi* (Pisces: Gempylidae) from Korea. *Fisheries and aquatic sciences* **2012**, *15*, 251-253, doi:10.5657/fas.2012.0251.
- Nashad, M.; Swapnil, S.S.; Pradeep, H.D.; Monalisa, S.D. First record of escolar, *Lepidocybium flavobrunneum* (Smith, 1843) from the Indian EEZ of Andaman Sea. *Indian Journal of Geo Marine Sciences* **2018**, *47*, 1409-1412.

- Osmany, H.B.; Zohra, K.; Manzoor, H. First official record of the snake mackerel, *Gempylus serpens* Cuvier, 1829 (family Gempylidae) in Pakistan. *International Journal of Biology and Biotechnology* **2019**, *16*, 979-981.
- Randall, J.E. Randall's tank photos. Collection of 10,000 large-format photos (slides) of dead fishes. Available online: [www.fishbase.org](http://www.fishbase.org) (see species pages for more details) (accessed on June 29).
- Song, Y.S.; Myoung, S.H.; Kim, J.-K. First Record of the Escolar *Lepidocybium flavobrunneum* (Perciformes: Gempylidae) from Jeju Island, Korea. *Korean Journal of Ichthyology* **2020**, *32*, 26-31, doi:10.35399/isk.32.1.5.
- Zohra, K.; Osmany, H.B.; Manzoor, H. First record of escolar, *Lepidocybium flavobrunneum* (Smith, 1843) from Pakistani off-shore water with comprehensive profile. *International Journal of Biology and Biotechnology* **2020**, *17*, 383-389.

### **Stromateoidei**

- Ayas, D.; Erguden, D.; Çiftçi, N.; Bakan, M. The New Locality Record of *Centrolophus niger* (Gmelin, 1789), from Büyükeceli Coast (North-Eastern Mediterranean Sea). *Comu Journal of Marine Science and Fisheries* **2018**, *1*, 48-52.
- Horn, M.H.; Haedrich, R.L. Systematic and Distributional Status of *Psenes sio* and *Psenes pellucidus* (Pisces, Stromateoidei) in the Eastern Pacific. *Copeia* **1973**, *1973*, 167-169, doi:10.2307/1442384.
- Mackay, K.T. Further Records of the Stromateoid Fish *Centrolophus niger* from the Northwestern Atlantic, with Comments on Body Proportions and Behavior. *Copeia* **1972**, *1972*, 185-187, doi:10.2307/1442800.
- Reyes, P.; Hüne, M.; Rui, V.H. El pez mesopelagico *Centrolophus niger* (Gmelin, 1789) (Pisces: Perciformes) y su hallazgo en aguas del talud continental chileno situadas sobre la placa sudamericana. *Gayana* **2007**, *71*, 96-101, doi:10.4067/S0717-65382007000100010

### **Scombrabrachidae**

- Bineesh, K.K.; Akhilesh, K.V.; Shanis, C.P.R.; Abdussamad, E.M.; Pillai, N.G.K. First report of longfin escolar, *Scombrabrach heterolepis* (Perciformes: Scombrabrachidae) from Indian waters. *Marine Biodiversity Records* **2012**, *5*, doi:10.1017/s1755267212000656.
- Carvalho-Filho, A.; Marcovaldi, G.; Sampaio, C.A.; Paiva, M.I.G.; Duarte, I. Two new records of uncommon deep-sea perciform fishes from the Southwestern Atlantic. *Zootaxa* **2010**, *2694*, 59-68.
- Hata, H.; Koeda, K.; Ho, H.-C.; Motomura, H. First record of the longfin escolar *Scombrabrach heterolepis* Roule, 1921 (Perciformes, Scombrabrachidae) from Taiwan. *Platax* **2019**, *16*, 83-89, doi:10.29926/PLATAX.201912\_2019.0007.

### **Trichiuridae**

- Eduardo, L.N.; Villarins, B.T.; Lucena-Frédou, F.; Frédou, T.; Lira, A.S.; Bertrand, A.; Mincarone, M.M. First record of the intermediate scabbardfish *Aphanopus intermedius* (Scombriformes: Trichiuridae) in the western South Atlantic Ocean. *Journal of Fish Biology* **2018**, *93*, 992-995, doi:https://doi.org/10.1111/jfb.13796.
- Templeman, W.; Squires, H.J. Three records of the black scabbard fish, *Aphanopus carbo* Lowe, from the Canadian region of the Western Atlantic. *Journal Fisheries Research Board of Canada* **1963**, *20*, 273-278.

### *Scorpaeniformes*

### **Anarhinchadidae**

- Liu, Y.; Li, F.; Zhang, X.; Bian, L.; Chen, S.; Qu, J.; Gao, W.; Liu, C.; Ge, J. Morphological Characteristics, Digestive System and Reproductive System of the Wolf-Eel (*Anarrhichthys ocellatus*). *Progress in Fishery Sciences* **2021**, *42*, 79–86, doi:10.19663/j.issn2095-9869.20200211003.
- Rodríguez-Cabello, C.; Diez, G.; Perez, M.; Banon, R. Range extension: records of *Anarrhichas denticulatus* (Perciformes: Anarrhichadidae) caught in the southern Bay of Biscay (NE Atlantic). *Cybium* **2015**, *39*, 309–312.

### Scorpaenidae

- Ali, M.; Alkusaury, H.; Saad, A.; Reynaud, C.; Capape, C. First record of *Pterois miles* (Osteichthyes: Scorpaenidae) in Syrian marine waters: Confirmation of its accordance in the eastern Mediterranean. *Tishreen University Journal for Research and Scientific Studies - Biological Series* **2016**, *38*, 307–313.
- Ali, M.; Reynaud, C.; Capapé, C. Has a viable population of common lionfish, *Pterois miles* (Scorpaenidae), established off the Syrian Coast (Eastern Mediterranean). *Annales, Series historia naturalis* **2017**, *27*, 157–162, doi:10.19233/ASHN.2017.19.
- Ben Amor, K.O.; Ben Souissi, J.; Capapé, C.; Ben Amor, M.M. Unusual record of bluemouth rockfish *Helicolenus dactylopterus* (Osteichthyes: Scorpaenidae) in Tunis Southern Lagoon (Northern Tunisia, Central Mediterranean). *Journal of Ichthyology* **2016**, *56*, 620–624, doi:10.1134/S0032945216040081.
- Guzmán-Méndez, I.; Rivera-Madrid, R.; Díaz-Jaimes, P.; García-Rivas, M.; Aguilar-Espinosa, M.; Arias-González, J. First genetically confirmed record of the invasive devil firefish *Pterois miles* (Bennett, 1828) in the Mexican Caribbean. *BiolInvasions Records* **2017**, *6*, 99–103, doi:10.3391/bir.2017.6.2.02.
- Oray, I.K.; Sinay, E.; Saadet Karakulak, F.; Yıldız, T. An expected marine alien fish caught at the coast of Northern Cyprus: *Pterois miles* (Bennett, 1828). *Journal of Applied Ichthyology* **2015**, *31*, 733–735, doi:10.1111/jai.12857.
- Taskavak, E.; Gurkan, Ş.; Taylan, B. Some Observations on the Depth Range and Size of Devil Firefish *Pterois miles* (Bennett, 1828) (Scorpaenidae) in Silifke Mersin (Turkey). *Acta Natura et Scientia* **2021**, *2*, 53–57, doi:10.29329/actanatsci.2021.314.9.

### Setarchidae

- Romanov, E.V.; Cherel, Y.; Marsac, F. New record of *Ectreposebastes niger* (Fourmanoir, 1971) (Setarchidae, Scorpaeniformes): a rare bathypelagic fish from La Pérouse Seamount, Western Indian Ocean, and distribution of *Ectreposebastes* Garman, 1899 in the Indian Ocean. *Zoosystema* **2021**, *43*, 283–296, doi:10.5252/zoosystema2021v43a15.

### Synanceiidae

- Karna, S.K.; Manna, R.K.; Panda, D.; Mukherjee, M.; Suresh, V.R.; Raut, A.; Mukhopadhyay, M.K. First record of *Trachicephalus uranoscopus* (Bloch and Schneider, 1801) from Chilika lagoon, Odisha coast of India. *Indian Journal of Geo Marine Sciences* **2019**, *48*, 1335–1337.

### Spariformes

#### Lethridinidae

- Borsa, P.; Béarez, P.; Chen, W.-J. *Gymnocranius oblongus*, a new large-eye bream species from New Caledonia (Teleostei: Lethrinidae). *Comptes Rendus Biologies* **2010**, *333*, 241–247, doi:https://doi.org/10.1016/j.crv.2009.12.015.



Randall, J.E. Randall's tank photos. Collection of 10,000 large-format photos (slides) of dead fishes.

Available online: [www.fishbase.org](http://www.fishbase.org) (see species pages for more details) (accessed on June 29).

Reyes, R.B. Photos contributed by Rodolfo B. Reyes to Fishbase. Available online: [www.fishbase.org](http://www.fishbase.org) (see species pages for more details) (accessed on July 31).

### Sparidae

Al Mabruk, S.; Zava, B.; Nour, O.M.; Corsini-Foka, M.; Deidun, A. Record of *Terapon jarbua* (Forsskål, 1775) (Terapontidae) and *Acanthopagrus bifasciatus* (Forsskål, 1775) (Sparidae) in the Egyptian Mediterranean waters. *BioInvasions Records* **2021**, *10*, 710-720, doi:10.3391/bir.2021.10.3.21.

Cengiz, Ö. Maximum Size Record of Sharpsnout Seabream (*Diplodus puntazzo* Walbaum, 1792) for Saros Bay, Northern Aegean Sea. *Marine Science and Technology Bulletin* **2019**, *8*, 55-57, doi:10.33714/masteb.596481.

Cengiz, Ö.; Kızılkaya, B.; Paruğ, Ş.Ş. Growth Characteristics of Annular Seabream (*Diplodus annularis* Linnaeus, 1758) for Turkish Waters. *Kahramanmaraş Sütçü İmam Üniversitesi Tarım ve Doğa Dergisi* **2019**, *22*, 817-822, doi:10.18016/ksutarimdog.vi.525929.

Cengiz, Ö.; Paruğ, Ş.Ş.; Kızılkaya, B. Maximum Length Record of Common Two-banded Seabream (*Diplodus vulgaris* Geoffroy Saint-Hilaire, 1817) for Aegean Sea with Turkish Waters. *Alinteri Journal of Agriculture Sciences* **2019**, *34*, 160–163, doi:10.28955.alinterizbd.638974.

Goode, G.B.; Bean, T.H. Catalogue of a collection of fishes sent from Pensacola, Florida, and vicinity, by Mr. Silas Stearns, with descriptions of six new species. *Proceedings of the United States National Museum* **1879**, *2*, 121–156.

Paruğ, Ş.; Cengiz, Ö. The Maximum Length Record of the Blackspot Seabream (*Pagellus bogaraveo* Brünich, 1768) for the Entire Aegean Sea and Turkish Territorial Waters. *Turkish Journal of Agriculture - Food Science and Technology* **2020**, *8*, 2125-2130, doi:10.24925/turjaf.v8i10.2125-2130.3597.

Paruğ, Ş.; Cengiz, Ö. The Maximum Length Record of the White Seabream (*Diplodus sargus* Linnaeus, 1758) for the Aegean Sea. *Acta Natura et Scientia*, **2020**, *1*, 96–108.

### Stephanoberyciformes

Schwartz, F.J. *Acanthochaenus lütkenii* from off North Carolina with additional meristic and morphometric comparisons for Western Atlantic specimens. *Journal of the Elisha Mitchell Scientific Society* **1990**, *106*, 51–55.

### Synbranchiiformes

Duong, T.-Y.; Tran, L.V.D.; Nguyen, N.-T.T.; Jamaluddin, J.A.F.; Azizah, M.N.S. Unravelling taxonomic ambiguity of the Mastacembelidae in the Mekong Delta (Vietnam) through DNA barcoding and morphological approaches. *Tropical Zoology* **2020**, *33*, doi:10.4081/tz.2020.72.

### Tetraodontiformes

Afrisal, M.; Nurjirana; Irmawati; Burhanuddin, A.I. Osteological study of Titan Trigger fish, *Balistoides viridescens* (Bloch and Schneider, 1801) (Balistidae: Tetraodontiformes) from the Spermonde Archipelago Waters. *IOP Conference Series: Earth and Environmental Science* **2019**, *370*, doi:10.1088/1755-1315/370/1/012035.

Alshawy, F.; Ibrahim, A.; Hussein, C.; Lahlah, M. First record of the oceanic puffer *Lagocephalus lagocephalus* (Linnaeus, 1758) from the Syrian marine waters (eastern Mediterranean). *Marine Biodiversity Records* **2019**, *12*, 11, doi:10.1186/s41200-019-0170-9.

Erguden, D.; Gurlek, M.; Turan, C. First occurrence of the oceanic puffer, *Lagocephalus lagocephalus* (Linnaeus, 1758) in Iskenderun Bay, north-eastern Mediterranean, Turkey. *Journal of Applied Ichthyology* **2017**, *33*, 801–803, doi:https://doi.org/10.1111/jai.13363.

- Erguden, D.; Kabaklı, F.; Uyan, A.; Doğdu, S.A.; Karan, S.; Gurlek, M.; Turan, C. New record of diamondback puffer *Lagocephalus guentheri* Miranda Ribeiro, 1915 from the North-Eastern Mediterranean, Turkey. *Natural and Engineering Sciences* **2017**, 2, 67-73, doi:10.28978/nesciences.369554.
- Hattour, A.; Nakamura, I.; Nguira, A. A large oceanic puffer fish rare in Tunisian waters. *Bulletin de l'Institut National des Sciences et Technologies de Mer de Salammô* **2004**, 31, 123-125.
- Kiparissis, S.; Peristeraki, P.; Tampakakis, K.; Kosoglou, I.; Doudoumis, V.; Batargias, C. Range expansion of a restricted lessepsian: westbound expansion breakthrough of *Lagocephalus spadiceus* (Richardson, 1844) (Actinopterygii: Tetraodontidae). *BioInvasions Records* **2018**, 7, 197-203, doi:10.3391/bir.2018.7.2.13.
- Lipej, L.; Mavrič, B.; Paliska, D. New northernmost record of the blunthead pufferfish, *Sphoeroides pachygaster* (Osteichthyes: Tetraodontidae) in the Mediterranean Sea. *Annales, Series Historia Naturalis* **2013**, 23, 103-114.
- Metin, G.; Akyol, O. Maximum size of *Stephanolepis diaspros* (Tetraodontiformes: Monacanthidae). *Marine Science and Technology Bulletin* **2020**, 10, 23-27.
- Teker, S.; Gökoğlu, M.; Korun, J. Antalya Körfezi'nde Nadir Bir Balon Balığı Türü; Mavi Balon Balığı *Lagocephalus lagocephalus* (Linnaeus, 1758). *Süleyman Demirel Üniversitesi Eğirdir Su Ürünleri Fakültesi Dergisi* **2018**, 14, 215-219, doi:10.22392/egirdir.392146.

## Diodontidae

- Aditya Bandyopadhyay, S. On the Record of a Spot-Fin Porcupine Fish, *Diodon hystrix* (Linnaeus, 1758) from Mandarmani, Bay of Bengal Coast of West Bengal, India. *Proceedings of the Zoological Society* **2014**, 67, 175-177, doi:10.1007/s12595-013-0087-y.

## Molidae

- Babu, C.; Silambarasan, K.; Anrose, A.; Ramalingam, L. A new record of a rare species *Masturus lanceolatus* (Point-tail sunfish) from Chennai coastal waters, India. *Indian Journal of Geo Marine Sciences* **2019**, 48, 297-301.
- Jawad, L.; Al-Mamry, J.; Al-Kharusi, L. First record of *Mola ramsayi* from the Sea of Oman, Sultanate of Oman. *Marine Biodiversity Records* **2012**, 5, 1-4, doi:10.1017/S1755267212000462.
- Yasemi, M.; Nazari Bejgan, A.R. The first record of southern ocean sunfish, *Mola ramsayi* from Northern Oman Sea, Iran. *Iranian Journal of Fisheries Science* **2014**, 13, 242-246.

## Multiple Groups

- Ali, A.M.; Algurabi, M.A.; Nasibulina, B.M.; Kurochkina, T.F.; Bakhshalizadeh, S. New Records of some fishes from Hadhramout coast, Gulf of Aden, Yemen. *Iranian Journal of Ichthyology* **2021**, 8, doi:dx.doi.org/10.22034/iji.v8i3.564.
- Dey, S.; Manorama, M.; Ramanujam, S.N. New records of three species of fish in the upper reaches of the Brahmaputra and Surma-Meghna river basins, Meghalaya, India. *Journal of Threatened Taxa* **2015**, 7, 7922-7926, doi:10.11609/JoTT.o3297.7922-6.

## Sarcopterygii

- Bailes, H.J.; Trezise, A.E.O.; Collin, S.P. The optics of the growing lungfish eye: Lens shape, focal ratio and pupillary movements in *Neoceratodus forsteri* (Krefft, 1870). *Visual Neuroscience* **2007**, 24, 377-387, doi:10.1017/S0952523807070381.

- Benno, B.; Verheij, E.; Stapley, J.; Rumisha, C.; Ngatunga, B.; Abdallah, A.; Kalombo, H. Coelacanth (*Latimeria chalumnae* Smith, 1939) discoveries and conservation in Tanzania. *South African Journal of Science* **2006**, *102*, 486–490.
- De Vos, L.; Oyugi, D. First capture of a coelacanth, *Latimeria chalumnae* Smith, 1939 (Pisces: Latimeriidae), off Kenya: news & views. *South African Journal of Science* **2002**, *98*, 345–347.
- Erdmann, M.V.; Caldwell, R.L.; Jewett, S.L.; Tjakrawidjaja, A. The second recorded living coelacanth from north Sulawesi. *Environ Biol Fish* **1999**, *54*, 445–451.
- Gunther, A.C.L.G. Description of ceratodus, a genus of ganoid fishes, recently discovered in rivers of Queensland, Australia. *Phil Trans R Soc Lond* **1871**, *161*, 511–571, doi:10.1098/rstl.1871.0020.
- Jolivet, D. *Latimeria* Paris.jpg. Available online: [https://commons.wikimedia.org/wiki/File:Latimeria\\_Paris.jpg](https://commons.wikimedia.org/wiki/File:Latimeria_Paris.jpg) (accessed on November 15, 2022).
- Nulens, R.; Scott, L.; Herbin, M. An updated inventory of all known specimens of the coelacanth, *Latimeria* spp. *Smithiana* **2011**, *3*, 1–52.
- Saruwatari, T.; Iwata, M.; Yabumoto, Y.; Hukom, F.D.; Peristiwady, T.; Abe, Y. A detailed morphological measurement of the seventh specimen of the Indonesian coelacanth, *Latimeria menadoensis*, with a compilation of current morphological data of the species. *Bulletin of the Kitakyushu Museum of Natural History and Human History, Series A (Natural History)* **2019**, *17*, 67–80.

## Chondrichthyes

### Carcharhiniformes

#### Carcharhinidae

- Baranes, A.; Ben-Tuvia, A. Occurrence of the sandbar shark *Carcharhinus plumbeus* in the northern Red Sea. *Israel Journal of Zoology* **1978**, *27*, 45–51, doi:10.1080/00212210.1978.10688457.
- Baranes, A.; Ben-Tuvia, A. Two rare carcharhinids, *Hemipristis elongatus* and *Iago omanensis*, from the northern Red Sea. *Israel Journal of Zoology* **1979**, *28*, 39–50, doi:10.1080/00212210.1979.10688469.
- Ben Amor, M.M.; Diatta, Y.; Diop, M.; Ben Salem, M.; Capapé, C. Confirmed occurrence in the Mediterranean Sea of milk shark *Rhizoprionodon acutus* (Chondrichthyes: Carcharhinidae) and first record off the Tunisian coast. *Cahiers de Biologie Marine* **2016**, *57*, 145–149.
- Bhagawati, D.; Nurani, T.; Abulias, M.N. Jenis, performa, dan nisbah kelamin ikan hiu yang didaratkan di Pelabuhan Perikanan Samudra Cilacap. *Jurnal Iktiologi Indonesia* **2018**, *17*, doi:10.32491/jii.v17i2.358.
- Brum, J.M.M.; Azevedo, J.M.N. First record of the Galapagos shark *Carcharhinus galapagensis* (Snodgrass and Heller, 1905) (Carcharhinidae) on the Azores. *Boletim do Museu Municipal do Funchal* **1995**, *Supplement No. 4*, 139–143.
- Cho, H.-G.; Kweon, S.-M.; Kim, B.-J. New Record of the Spadenose Shark, *Scoliodon laticaudus* (Carcharhiniformes: Carcharhinidae) from South Sea, Korea. *Korean Journal of Ichthyology* **2014**, *26*, 336–339.
- Clark, E.; Schmidt, K., von. Sharks of the central Gulf Coast of Florida. *Bulletin of Marine Science* **1965**, *15*, 13–83.
- Compagno, L.J.V.; White, W.T.; Cavanagh, R.D. *Glyphis fowlerae* sp. nov., a new species of river shark (Carcharhiniformes; Carcharhinidae) from northeastern Borneo. *CSIRO Marine and Atmospheric Research Paper* **2010**, *32*, 29–44.
- Compagno, L.J.V.; White, W.T.; Last, P.R. *Glyphis garricki* sp. nov., a new species of river shark (Carcharhiniformes: Carcharhinidae) from northern Australia and Papua New Guinea, with a redescription of *Glyphis glyphis* (Müller & Henle, 1839). In *Descriptions of new Australian*

- chondrichthyans*, Last, P.R., White, W.T., Pogonoski, J.J., Eds.; CSIRO Marine and Atmospheric Research: Hobart, 2008; pp. 203-225.
- Dolganov, V.N. The capture of a great white shark *Carcharodon carcharias* Linnaeus, 1758 (Carcharodontidae) in Peter the Great Bay (Sea of Japan). *Russian Journal of Marine Biology* **2012**, *38*, 88–90, doi:10.1134/S106307401201004X.
- Garrick, J.A.F. Sharks of the genus *Carcharhinus*. *NOAA Technical Report NMFS Circular* **1982**, *445*, 1–194.
- Garrick, J.A.F. Additions to a revision of the shark genus *Carcharhinus*: Synonymy of *Aprionodon* and *Hypoprion*, and description of a new species of *Carcharhinus* (Carcharhinidae). *NOAA Technical Report NMFS* **1985**, *34*, 1–25.
- Hoese, H.D. Sharks and rays of Virginia's seaside bays. *Chesapeake Science* **1962**, *3*, 166–172, doi:10.2307/1350994.
- Jensen, C.; Schwartz, F.J.; Hopkins, G. Occurrence of an adult male reef shark, *Carcharhinus perezii* (Carcharhinidae) off North Carolina. *Journal of the Elisha Mitchell Scientific Society* **1995**, *111*, 121-125.
- Lopes, E.Q.; Paula dos Santos, B., de; Chechim de Faria, I.; Gonçalves de Lima, T.; Queiroz de Lucca, D.S. Records of occurrences of tiger sharks (*Galeocerdo cuvier*, Peron and Lesueur, 1822) off the coast of Peruíbe - São Paulo-Brazil, APA-CIP and Conservation Units of the Jureia Itatins-SP Mosaic. *Brazilian Journal of Animal and Environmental Research* **2020**, *3*, 4270-4282, doi:10.34188/bjaerv3n4-131.
- McKenzie, R.A.; Tibbo, S.N. A Morphometric Description of Blue Shark (*Prionace glauca*) from Canadian Atlantic Waters. *Journal of the Fisheries Research Board of Canada* **1964**, *21*, 865-866, doi:10.1139/f64-081.
- Moore, A.B.M.; White, W.T.; Ward, R.D.; Naylor, G.J.P.; Peirce, R. Rediscovery and redescription of the smoothtooth blacktip shark, *Carcharhinus leiodon* (Carcharhinidae), from Kuwait, with notes on its possible conservation status. *Marine and Freshwater Research* **2011**, *62*, doi:10.1071/mf10159.
- Nair, R.V.; Appukuttan, K.K. Observations on the developmental stages of the smooth dogfish, *Eridacnis radcliffei* Smith from Gulf of Mannar. *Indian Journal of Fisheries* **1974**, *21*, 141-151.
- Nakamura, J.; Yamada, M.; Motomura, H. Male and female specimens of the Sliteye Shark *Loxodon macrorhinus* (Carcharhiniformes: Carcharhinidae) from Amami-oshima island, Amami Islands, Satsunan Islands, Kagoshima Prefecture, Japan: the first records from the Satsunan Islands and the northernmost records for the species in the Pacific Ocean. *Ichthy, Natural History of Fishes of Japan* **2021**, *11*, 17-20, doi:10.34583/ichthy.11.0\_17.
- Peverell, S.C.; McPherson, G.R.; Garrett, R.N.; Gribble, N.A. New records of the River Shark *Glyphis* (Carcharhinidae) reported from Cape York Peninsula, northern Australia. *Zootaxa* **2006**, *1233*, 53–68, doi:10.11646/zootaxa.1233.1.2.
- Radcliffe, L. The sharks and rays of Beaufort, North Carolina. *Bulletin of the Bureau of Fisheries* **1916**, *34*, 239-284.
- Rafrafi-Nouira, S.; El Kamel-Moutalibi, O.; Reynaud, C.; Boumaïza, M.; Capapé, C. Additional and unusual captures of elasmobranch species from the northern coast of Tunisia (central Mediterranean). *Journal of Ichthyology* **2015**, *55*, 836–848, doi:10.1134/S0032945215060181.
- Randall, J.E. Contribution to the biology of the whitetip reef shark (*Triaenodon obesus*). *Pacific Science* **1977**, *31*, 143-164.
- Sarangdhar. Tiger shark *Galeocerdo tigrinus* Muller & Henle. Feeding and breeding habits. *J Bombay Nat Hist Soc* **1943**, *46*, 102-110.

- Schultz, L.P.; Herald, E.S.; Lachner, E.A.; Welander, A.D.; Woods, L.P. Fishes of the Marshall and Marianas Islands. Volume I: Families from Asymmetronidae through Siganidae. *Bulletin of the United States National Museum* **1953**, *202*, 1-685.
- Schwartz, F.J. Two Eight-Foot Cub Sharks, *Carcharhinus leucas* (Muller and Henle), Captured in Chesapeake Bay, Maryland. *Copeia* **1959**, *1959*, 251–252, doi:10.2307/1440400.
- Schwartz, F.J. Occurrence, Abundance, and Biology of the Blacknose Shark, *Carcharhinus acronotus*, in North Carolina. *Northeast Gulf Science* **1984**, *7*, 1-19, doi:10.18785/negs.0701.02.
- Springer, V.G. A revision of the carcharhinid genera *Scoliodon*, *Loxodon*, and *Rhizoprionodon*. *Proceedings of the United States National Museum* **1964**, *115*, 559–632.
- Taniuchi, T. Reef whitetip shark, *Triaenodon obesus*, from Japan. *Japanese Journal of Ichthyology* **1975**, *22*, 167-170.
- Thorburn, D.C.; Morgan, D.L. The northern river shark *Glyphis* sp. C (Carcharhinidae) discovered in Western Australia. *Zootaxa* **2004**, *685*, doi:10.11646/zootaxa.685.1.1.
- Veena, S.; Thomas, S.; Raje, S.G.; Durgekar, R. Case of leucism in the spadenose shark, *Scoliodon laticaudus* (Müller and Henle, 1838) from Mangalore, Karnataka. *Indian Journal of Fisheries* **2011**, *58*, 109-112.
- Weigmann, S. Contribution to the Taxonomy and Distribution of Six Shark Species (Chondrichthyes, Elasmobranchii) from the Gulf of Thailand. *ISRN Zoology* **2012**, *2012*, 1–24, doi:10.5402/2012/860768.
- White, W.T.; Last, P.R.; Lim, A.P.K. Rediscovery of the rare and endangered Borneo Shark *Carcharhinus borneensis* (Bleeker, 1858) (Carcharhiniformes: Carcharhinidae). In *Descriptions of New Sharks and Rays from Borneo*, Last, P.R., White, W.T., Pogonoski, J.J., Eds.; CSIRO: Canberra, 2010; pp. 17-28.
- White, W.T.; Last, P.R.; Naylor, G.J.P. *Scoliodon macrorhynchus* (Bleeker, 1852), a second species of spadenose shark from the Western Pacific (Carcharhiniformes: Carcharhinidae). In *Descriptions of New Sharks and Rays from Borneo*, Last, P.R., White, W.T., Pogonoski, J.J., Eds.; CSIRO: Canberra, 2010; pp. 61-76.
- White, W.T.; Last, P.R.; Naylor, G.J.P.; Harris, M. Resurrection and redescription of the Borneo Broadfin Shark *Lamiopsis tephrodes* (Fowler, 1905) (Carcharhiniformes: Carcharhinidae). In *Descriptions of New Sharks and Rays from Borneo*, Last, P.R., White, W.T., Pogonoski, J.J., Eds.; CSIRO: Canberra, 2010; pp. 45-59.
- Whitley, G.P. Ichthyological descriptions and notes. *Proceedings of the Linnean Society of New South Wales* **1943**, *68*, 114-144.
- Whitley, G.P. New sharks and fishes from western Australia. Part 2. *The Australian Zoologist* **1945**, *11*, 1-45.
- Whitley, G.P. A new shark from north-western Australia. *The Western Australian Naturalist* **1950**, *1-2*, 100-105.
- Yoshino, T.; Hiramatsu, W.; Toda, M.; Uchida, S. New records of two sharks, *Nebrius concolor* and *Negaprion acutidens*, from Japanese waters. *Bulletin of the College of Science, University of the Ryukyus* **1981**, *32*, 37–46.

### Hemigaleidae

- Baranes, A.; Ben-Tuvia, A. Two rare carcharhinids, *Hemipristis elongatus* and *Iago omanensis*, from the northern Red Sea. *Israel Journal of Zoology* **1979**, *28*, 39-50, doi:10.1080/00212210.1979.10688469.
- Bineesh, K.K.; Sankar, R.K.; Nashad, M.; Retheesh, T.B.; Kumar, R.R.; Basheer, V.S. Report on Sickletfin weasel shark *Hemigaleus microstoma* (Bleeker, 1852) (Carcharhiniformes: Hemigaleidae) from

- the Andaman Islands, Indian EEZ with DNA barcodes. *Records of the Zoological Society of India* **2020**, 120, 153-159, doi:10.26515/rzsi/v120/i2/2020/144516.
- Chappell, A.; Seret, B. Functional Morphology of the Feeding Apparatus of the Snaggletooth Shark, *Hemipristis elongata* (Carcharhiniformes: Hemigaleidae). *J Anat* **2021**, 238, 288-307, doi:10.1111/joa.13313.
- Compagno, L.J.V.; Krupp, F.; Carpenter, K.E. A New Weasel Shark of the Genus *Paragaleus* from the Northwestern Indian Ocean and the Arabian Gulf (Carcharhiniformes: Hemigaleidae). *Fauna of Saudi Arabia* **1996**, 15, 391-401.
- Compagno, L.J.V.; Stevens, J.D. *Hemitriakis falcata* n.sp. and *H. abdita* n.sp., Two New Houndsharks (Carcharhiniformes: Triakidae) from Australia. *Records of the Australian Museum* **1993**, 45, 195-220.
- Smith, J.L.B. The rare shark *Hemipristis elongatus* (Klunzinger), 1871, from Zanzibar and Mozambique. *Annals and Magazine of Natural History* **1957**, 10, 555-560, doi:10.1080/00222935708655997.
- Stevens, J.D.; Cuthbert, G.J. Observations on the Identification and Biology of *Hemigaleus* (Selachii: Carcharhinidae) from Australian Waters. *Copeia* **1983**, 1983, 487-497, doi:10.2307/1444394.
- Tyabji, Z.; Jabado, R.W.; Sutaria, D. New records of sharks (Elasmobranchii) from the Andaman and Nicobar Archipelago in India with notes on current checklists. *Biodivers Data J* **2018**, e28593, doi:10.3897/BDJ.6.e28593.
- Weigmann, S. Contribution to the Taxonomy and Distribution of Six Shark Species (Chondrichthyes, Elasmobranchii) from the Gulf of Thailand. *ISRN Zoology* **2012**, 2012, 1-24, doi:10.5402/2012/860768.

### Scyliorhinidae

- Akhilesh, K.V.; Bineesh, K.K.; Mishra, S.S.; Ganga, U.; Pillai, N.G.K. Notes on the Indian swellshark, *Cephaloscyllium silasi* (Scyliorhinidae: Carcharhiniformes) from deep waters off the west coast of India. *Marine Biodiversity Records* **2014**, 7, E25, doi:10.1017/s1755267214000141.
- Compagno, L.J.V. *Scyliorhinus comoroensis* sp. n., a new catshark from the Comoro Islands, western Indian Ocean (Carcharhiniformes, Scyliorhinidae). *Bulletin du Muséum National d'Histoire Naturelle, (Série 4), Section A, Zoologie Biologie et Ecologie Animales* **1988**, 10, 603-625.
- Compagno, L.J.V.; Stevens, J.D. *Galeus gracilis* n.sp., a New Sawtail Catshark from Australia, with Comments on the Systematics of the Genus *Galeus* Rafinesque, 1810 (Carcharhiniformes: Scyliorhinidae). *Records of the Australian Museum* **1993**, 45, 171-194.
- Gomes, U.L.; Peters, G.O.; De Carvalho, M.R.; Gadig, O.B.F. Anatomical investigation of the slender catshark *Schroederichthys tenuis* Springer, 1966, with notes on intrageneric relationships (Chondrichthyes: Carcharhiniformes: Scyliorhinidae). *Zootaxa* **2006**, 1119, doi:10.11646/zootaxa.1119.1.2.
- Hsu, H.H.; Joung, S.J.; Ebert, D.A.; Lin, C.Y. Records of new and rare elasmobranchs from Taiwan. *Zootaxa* **2013**, 3752, 249-255, doi:10.11646/zootaxa.3752.1.15.
- Ito, N.; Fujii, M.; Nohara, K.; Tanaka, S. *Scyliorhinus hachijoensis*, a new species of catshark from the Izu Islands, Japan (Carcharhiniformes: Scyliorhinidae). *Zootaxa* **2022**, 5092, 331-349, doi:10.11646/zootaxa.5092.3.5.
- Konstantinou, H.; Cozzi, J.R. *Galeus springeri*, a New Species of Sawtail Catshark from the Caribbean Sea (Chondrichthyes, Scyliorhinidae). *Copeia* **1998**, 1998, 151-158, doi:10.2307/1447711.
- McLaughlin, D.M.; Morrissey, J.F. New Records of Elasmobranchs from the Cayman Trench, Jamaica. *Bulletin of Marine Science* **2004**, 75, 481-485.
- Randall, J.E. Randall's tank photos. Collection of 10,000 large-format photos (slides) of dead fishes. Available online: [www.fishbase.org](http://www.fishbase.org) (see species pages for more details) (accessed on June 29).

- Rincon, G.; Vooren, C.M. Taxonomic and biological records on the south Atlantic marbled catshark, *Galeus mincaronei* Soto, (Elasmobranchii: Scyliorhinidae) off the Southern Brazilian coast *Pan-American Journal of Aquatic Sciences* **2006**, *1*, 1-7.
- Soares, K.D.; Gadig, O.F.; Gomes, U.L. *Scyliorhinus ugoi*, a new species of catshark from Brazil (Chondrichthyes: Carcharhiniformes: Scyliorhinidae). *Zootaxa* **2015**, *3937*, 347-361, doi:10.11646/zootaxa.3937.2.6.
- Taylor, L.R. *Apristurus kampae*, a New Species of Scyliorhinid Shark from the Eastern Pacific Ocean. *Copeia* **1972**, *1972*, 71-78, doi:10.2307/1442783.

### **Sphyrnidae**

- Choi, Y.; Kim, I.-S.; Nakaya, K. New records of Sharks, *Sphyrna lewini* and *Alopias vulpinus* (Pisces: Elasmobranchii) in Korea. *Journal of Animal Systematics, Evolution, Diversity* **1997**, *13*, 285–290.
- Clark, E.; Schmidt, K., von. Sharks of the central Gulf Coast of Florida. *Bulletin of Marine Science* **1965**, *15*, 13–83.
- Rajapackiam, S.; Balasubramanian, K.K.; Ameer Hamsa, K.M.S.; Kasim, H.M. On the landing of large sized hammer head shark *Sphyrna lewini* at Tuticorin. *Marine Fisheries Information Service, Technical and Extension Series* **1994**, *127*, 14.
- Weigmann, S. Contribution to the Taxonomy and Distribution of Six Shark Species (Chondrichthyes, Elasmobranchii) from the Gulf of Thailand. *ISRN Zoology* **2012**, *2012*, 1–24, doi:10.5402/2012/860768.

### **Pentanchidae**

- Iglésias, S.P. *Apristurus nakayai* sp. nov., a new species of deepwater catshark (Chondrichthyes: Pentanchidae) from New Caledonia. *Cybium* **2012**, *36*, 511-519.

### **Proscyllidae**

- Last, P.R.; Vongpanich, V. A new finback catshark *Proscyllium magnificum* (Elasmobranchii: Proscyllidae) from the northeastern Indian Ocean. *Phuket Marine Biological Center Research Bulletin* **2004**, *65*, 23-29.
- Springer, S. *Triakis fehlmanni*, a new shark from the coast of Somalia. *Proceedings of the Biological Society of Washington* **1968**, *81*, 613-624.

### **Pseudotriakidae**

- Allen, G.R.; Cowan, M.A. First record of the false catshark, *Pseudotriakis microdon*, from Australian seas. *Records of the Western Australian Museum* **1995**, *17*, 235-236.
- Baranes, A. Sharks from the Amirantes Islands, Seychelles, with a description of two new species of squaloids from the deep sea. *Israel Journal of Zoology* **2003**, *49*, 33-65.
- Ebert, D.A.; Akhilesh, K.V.; Weigmann, S. *Planonassus indicus* sp. n., a new species of pygmy false catshark (Chondrichthyes: Carcharhiniformes: Pseudotriakidae), with a revised diagnosis of the genus and key to the family. *Marine Biodiversity* **2018**, *49*, 1321-1341, doi:10.1007/s12526-018-0915-4.
- Kyne, P.M.; Johnson, J.W.; White, W.T.; Bennett, M.B. First records of the false catshark, *Pseudotriakis microdon* Capello, 1868, from the waters of eastern Australia and Indonesia. *Mem Queensl Mus* **2005**, *51*, 525-530.
- Taniuchi, T.; Kobayashi, H.; Otake, T. Occurrence and reproductive mode of the false cat shark, *Pseudotriakis microdon*, in Japan. *Japanese Journal of Ichthyology* **1984**, *31*, 88-92, doi:10.11369/jji1950.31.88.

Yano, K.; Musick, J.A. Comparison of Morphometrics of Atlantic and Pacific Specimens of the False Catshark, *Pseudotriakis microdon*, with Notes on Stomach Contents. *Copeia* **1992**, 1992, 877-886, doi:10.2307/1446165.

### Triakidae

Garrick, J.A.F. Studies on New Zealand Elasmobranchii. Part III. A New Species of *Triakis* (Selachii) from New Zealand. *Transactions and Proceedings of the Royal Society of New Zealand* **1954**, 82, 695-702.

Kato, S. *Triakis acutipinna* (Galeoidea, Triakidae), a New Species of Shark from Ecuador. *Copeia* **1968**, 1968, 319-325, doi:10.2307/1441759.

Lowry, D.; Motta, P.J.; Hueter, R.E. The ontogeny of feeding behavior and cranial morphology in the leopard shark *Triakis semifasciata* (Girard 1854): A longitudinal perspective. *Journal of Experimental Marine Biology and Ecology* **2007**, 341, 153-167, doi:https://doi.org/10.1016/j.jembe.2006.07.018.

White, W.T.; Last, P.R. Description of two new species of smooth-hounds, *Mustelus widodoi* and *M. ravidus* (Carcharhiniformes: Triakidae) from the western central Pacific. *Cybius* **2006**, 30, 235-246.

Whitley, G.P. A new Australian shark. *Records of the South Australian Museum* **1943**, 7, 395-399.

### Chimaeriformes

Araya, J.F.; Reyes, P.; Hüne, M. On the presence of the Eastern Pacific Black Ghostshark *Hydrolagus melanophasma* (Chondrichthyes: Chimaeridae) in northern Chile, with notes on its distribution in the Eastern Pacific. *Thalassas: An International Journal of Marine Sciences* **2020**, 36, 565-572, doi:10.1007/s41208-020-00209-9.

Catarino, D.; Jakobsen, K.; Jakobsen, J.; Giacomello, E.; Menezes, G.M.; Diogo, H.; Canha, A.; Porteiro, F.M.; Melo, O.; Stefanni, S. First record of the opal chimaera, *Chimaera opalescens* (Holocephali: Chimaeridae) and revision of the occurrence of the rabbitfish *Chimaera monstrosa* in the Azores waters. *Journal of Fish Biology* **2020**, 97, 763-775, doi:10.1111/jfb.14432.

Didier, D.A. Two new species of chimaeroid fishes from the southwestern Pacific Ocean (Holocephali, Chimaeridae). *Ichthyological Research* **2002**, 49, 299-306, doi:10.1007/s102280200045.

Didier, D.A.; Nakaya, K. Redescription of *Rhinochimaera pacifica* (Mitsukuri) and first record of *R. africana* Compagno, Stehmann & Ebert from Japan (Chimaeriformes: Rhinochimaeridae) *Ichthyological Research* **1999**, 46, 139-152.

Luchetti, E.A.; Iglésias, S.P.; Sellos, D.Y. *Chimaera opalescens* n. sp., a new chimaeroid (Chondrichthyes: Holocephali) from the north-eastern Atlantic Ocean. *Journal of Fish Biology* **2011**, 79, 399-417, doi:https://doi.org/10.1111/j.1095-8649.2011.03027.x.

Shao, K.-T.; Hwang, D.-F. *Rhinochimaera pacifica*, (Chimaeriformes, Rhinochimaeridae): the first rhinochimaerid recorded from Taiwan. *Acta Zoologica Taiwanica* **1997**, 8, 97-102.

Silas, E.G.; Selvaraj, D.; Regunathan, A. Rare chimaeroid and elasmobranch fishes from the continental slope off the west coast of India. *Current Science* **1969**, 38, 105-106.

### Echinorhiniformes

Ángel, F.; Quinteiro, J.; Rey-Méndez, M. First record for the Caribbean Sea of the shark *Echinorhinus brucus* captured in Venezuelan waters. *Marine Biodiversity Records* **2014**, 7, e91, doi:10.1017/S1755267214000967.

Garrick, J.A.F. Studies on New Zealand Elasmobranchii.-Part X. The genus *Echinorhinus*, with account of a second species, *E. cookei* Pietschmann, 1928, from New Zealand Waters. *Transactions and Proceedings of the Royal Society of New Zealand* **1960**, 88, 105-117.



- Lee, W.-J.; Kim, J.-K. First Reliable Record of *Echinorhinus cookei* (Chondrichthyes: Elasmobranchii) Collected from Busan, Korea. *Korean Journal of Fisheries and Aquatic Sciences* **2018**, *51*, 595–599, doi:10.5657/KFAS.2018.0595.
- Musick, J.A.; McEachran, J.D. The squaloid shark *Echinorhinus brucus* off Virginia. *Copeia* **1969**, *1*, 205–206.
- Nair, R.V.; Lal Mohan, R.S. On the occurrence of the spiny shark *Echinorhinus brucus* (Bonnaterre) from the east coast of India with a note on its distribution. *Indian Journal of Animal Science* **1971**, *41*, 1011–1014.
- Schwartz, F.J. A North Carolina capture of the bramble shark, *Echinorhinus brucus*, family Echinorhinidae, the fourth in the western Atlantic. *Journal of the Elisha Mitchell Scientific Society* **1993**, *109*, 158–162.
- Silas, E.G.; Selvaraj, D.; Regunathan, A. Rare chimaeroid and elasmobranch fishes from the continental slope off the west coast of India. *Current Science* **1969**, *38*, 105–106.
- Varojean, D.H. Systematics of the genus *Echinorhinus* Blainville, based on a study of the prickly shark *Echinorhinus cookei* Pietschmann. Fresno State College, Fresno, 1972.

## Lamniformes

### Alopiidae

- Aneesh Kumar, K.V.; Paresh Khanolkar, S.; Pravin, P.; Meenakumari, B.; Radhakrishnan, E.V. First record of the pelagic thresher shark *Alopias pelagicus* (Pisces: Alopiiformes: Alopiidae) from the Lakshadweep Sea, India. *Marine Biodiversity Records* **2012**, *5*, e16, doi:10.1017/S1755267211001114.
- Bigelow, H.B.; Schroeder, W.C. Sharks. In *Fishes of the Western North Atlantic, Lancelets, Cyclostomes, and Sharks*, Tee-Van, J., Breder, C.M., Hildebrand, S.F., Parr, A.E., Schroeder, W.C., Eds.; Yale University Press: New Haven, 1948; pp. 59–546.
- Choi, Y.; Kim, I.-S.; Nakaya, K. New records of Sharks, *Sphyrna lewini* and *Alopias vulpinus* (Pisces: Elasmobranchii) in Korea. *Journal of Animal Systematics, Evolution, Diversity* **1997**, *13*, 285–290.
- Compagno, L.J.V.; Smale, M.J. Recent records of four warm-water elasmobranchs from the eastern Cape Province, South Africa. *South African Journal of Marine Science* **1986**, *4*, 11–15, doi:10.2989/025776186784461873.
- Ergüden, D.; Gürlek, M.; Turan, C. Occurrence of the Thresher *Alopias vulpinus* (Bonnaterre, 1788) from the Northeastern Mediterranean coast of Turkey. *Biharean Biologist* **2015**, *9*, 76–77.
- Gruber, S.H.; Compagno, L.J.V. Taxonomic status and biology of the bigeye thresher, *Alopias superciliosus*. *Fishery Bulletin* **1981**, *79*, 617–640.
- Nakamura, H. On the two species of the thresher shark from Formosan waters. *Memoirs of the Faculty of Science and Agriculture, Taihoku Imperial University* **1935**, *14*, 1–6.

### Cetorhinidae

- Ahnelt, H.; Sauberer, M.; Ramler, D.; Koch, L.; Pogoreutz, C. Negative allometric growth during ontogeny in the large pelagic filter-feeding basking shark. *Zoomorphology* **2020**, *139*, 71–83, doi:10.1007/s00435-019-00464-2.
- Ali, M.; Saad, A.; Reynaud, C.; Capapé, C. Occurrence of basking shark, *Cetorhinus maximus* (Elasmobranchii: Lamniformes: Cetorhinidae), off the Syrian coast (eastern Mediterranean) with first description of egg case. *Acta Ichthyologica Et Piscatoria* **2012**, *42*, 335–339, doi:10.3750/aip2012.42.4.07.
- Gudger, E.W. The basking shark, *Cetorhinus maximus*, on the North Carolina coast. *Journal of the Elisha Mitchell Scientific Society* **1948**, *64*, 41–44.

Springer, S.; Gilbert, P.W. The Basking Shark, *Cetorhinus maximus*, from Florida and California, with Comments on Its Biology and Systematics. *Copeia* **1976**, 1976, 47–54, doi:10.2307/1443770.

## Lamnidae

Applegate, S.P. A possible record-size bonito shark, *Isurus oxyrinchus* Rafinesque, from southern California. *California Fish and Game* **1966**, 52, 204–207.

Applegate, S.P. A new record-size bonito shark, *Isurus oxyrinchus* Rafinesque, from southern California. *California Fish and Game* **1977**, 63, 126–129.

De Maddalena, A.; Glaizot, O.; Olivier, G. On the Great White Shark, *Carcharodon carcharias* (Linnaeus, 1758), preserved in the Museum of Zoology in Lausanne. *Marine Life* **2003**, 13, 53–59.

Dolganov, V.N. The capture of a great white shark *Carcharodon carcharias* Linnaeus, 1758 (Carcharodontidae) in Peter the Great Bay (Sea of Japan). *Russian Journal of Marine Biology* **2012**, 38, 88–90, doi:10.1134/S106307401201004X.

Garrick, J.A.F. Revision of sharks of genus *Isurus* with description of a new species (Galeoidea, Lamnidae). *Proceedings of the United States National Museum* **1967**, 118, 663–690.

Kabaskal, H.; Kabaskal, Ö. First record of a shortfin mako shark, *Isurus oxyrinchus* Rafinesque, 1810 (Chondrichthyes: Lamnidae) from the Bay of Saroz (NE Aegean Sea). *Annales, Series historia naturalis* **2013**, 23, 27–32.

Lipej, L.; Uhan, J.; Mavrič, B.; Vujčić-Karlo, S. A record of porbeagle, *Lamna nasus* (Bonnaterre, 1788), in the Gulf of Trieste with discussion on its occurrence in the Adriatic Sea. *Acta Adriatica: International Journal of Marine Sciences* **2016**, 57, 305–313.

McKenzie, R.A.; Tibbo, S.N. A Morphometric description of Porbeagle (*Lamna nasus*) from Canadian Atlantic waters. *Journal Fisheries Research Board of Canada* **1964**, 21, 863–864.

Mignucci-Giannoni, A.A.; Cintrón-Nieves, D.; Franqui-Rivera, G.; Espinoza, R.; Orcera-Iglesias, J.M.; Rivera-Illaraza, P.J.; Rivera-Pérez, C.I.; Rodríguez-Ferrer, G. First Confirmed Record of the Longfin Mako Shark (*Isurus paucus*) for Puerto Rico. *Caribbean Naturalist* **2020**, 71, 1–9.

Nakaya, K. Descriptive notes on a porbeagle, *Lamna nasus*, from Argentine waters, compared with the North Pacific salmon shark, *Lamna ditropis*. *Bulletin of the Faculty of Fisheries, Hokkaido University* **1971**, 21, 269–279.

Pratt, H.L., Jr.; Casey, J.G.; Conklin, R.B. Observations on large white sharks, *Carcharodon carcharias*, off Long Island, New York. *Fishery Bulletin* **1982**, 80, 153–156.

Scacco, U.; Consalvo, I.; DiMuccio, S.; Tunesi, L. On the by-catch of two porbeagle sharks *Lamna nasus* in the central Adriatic Sea. *Marine Biodiversity Records* **2012**, 5, e61, doi:10.1017/S1755267212000127.

Skud, B.E. Measurements of a White Shark, *Carcharodon carcharias*, Taken in Maine Waters. *Copeia* **1962**, 1962, 659–661, doi:10.2307/1441208.

Springer, S. The Great White Shark, *Carcharodon carcharias* (Linnaeus), in Florida Waters. *Copeia* **1939**, 1939, 114–115, doi:10.2307/1435964.

Stevens, J.D.; Dunning, M.C.; Machida, S. Occurrence of the Porbeagle Shark, *Lamna nasus*, in the Tasman Sea. *Japanese Journal of Ichthyology* **1983**, 30, 301–307.

Tibbo, S.N.; McKenzie, R.A.; Scott, W.B. An occurrence of mako sharks, *Isurus oxyrinchus*, Rafinesque 1810, in the Canadian Arctic. *Journal Fisheries Research Board of Canada* **1963**, 20, 1353.

## Mitsukurinidae

Duffy, C.A.J. Further records of the goblin shark, *Mitsukurina owstoni* (Lamniformes: Mitsukurinidae), from New Zealand. *New Zealand Journal of Zoology* **1997**, 24, 167–171, doi:10.1080/03014223.1997.9518111.

- Lee, P.-F.; Shao, K.-T. Two new records of lamniform shark from the waters adjacent to Taiwan. *Journal Of The Fisheries Society Of Taiwan* **2009**, *36*, 303-311.
- Rincon, G.; Vaske, T.; Gadig, O.B.F. Record of the goblin shark *Mitsukurina owstoni* (Chondrichthyes: Lamniformes: Mitsukurinidae) from the south-western Atlantic. *Marine Biodiversity Records* **2012**, *5*, E44, doi:10.1017/s1755267211000923.
- Yano, K.; Miya, M.; Aizawa, M.; Noichi, T. Some aspects of the biology of the goblin shark, *Mitsukurina owstoni*, collected from the Tokyo Submarine Canyon and adjacent waters, Japan. *Ichthyological Research* **2007**, *54*, 388-398, doi:10.1007/s10228-007-0414-2.

### Megachasmidae

- Berra, T.M.; Hutchins, J.B. A specimen of megamouth shark, *Megachasma pelagios* (Megachasmidae) from Western Australia. *Records of the Western Australian Museum* **1990**, *14*, 651-656.
- Lee, P.-F.; Shao, K.-T. Two new records of lamniform shark from the waters adjacent to Taiwan. *Journal Of The Fisheries Society Of Taiwan* **2009**, *36*, 303-311.
- Sawamoto, S.; Matsumoto, R. Stomach contents of a megamouth shark *Megachasma pelagios* from the Kuroshio Extension: evidence for feeding on a euphausiid swarm. *Plankton and Benthos Research* **2012**, *7*, 203-206.
- Taylor, L.R.; Compagno, L.J.V.; Struhsaker, P.J. Megamouth - a new species, genus, and family of lamnoid shark (*Megachasma pelagios*, family Megachasmidae) from the Hawaiian Islands. *Proceedings of the California Academy of Science* **1983**, *43*, 87-110.
- Yano, K.; Yabumoto, Y.; Tanaka, S.; Tsukada, O.; Furuta, M. Capture of a mature female megamouth shark, *Megachasma pelagios*, from Mie, Japan. *Proceedings of the 5th Indo-Pacific Conference, Nouméa* **1997**, 335-349.

### Odontaspidae

- Anguila, R.; Nieto Alvarado, L.E.; Hernández Beracasa, L. Nuevos registros de peces de esqueleto cartilaginoso para el Caribe colombiano y uno como ampliación de su distribución geográfica en el Caribe colombiano para Bocas de Ceniza, Departamento de Atlántico, Colombia. *Bulletin of Marine and Coastal Research* **2016**, *45*, 361-373, doi:10.25268/bimc.invemar.2016.45.2.692.
- Bonfil, R. Is the ragged-tooth shark cosmopolitan? First record from the North Atlantic. *Journal of Fish Biology* **1995**, *47*, 341-344.
- Estupiñán-Montaño, C.; Galván-Magaña, F.; Hacoheñ-Domené, A.; Estupiñán-Ortiz, J.F. First reports of smalltooth sand tiger sharks, *Odontaspis ferox* (Elasmobranchii: Lamniformes: Odontaspidae), off the continental Ecuador. *Acta Ichthyologica et Piscatoria* **2016**, *46*, 251-253, doi:10.3750/aip2016.46.3.09.
- Radcliffe, L. The sharks and rays of Beaufort, North Carolina. *Bulletin of the Bureau of Fisheries* **1916**, *34*, 239-284.
- Sadowsky, V.; Amorim, A.F.d.; Arfelli, C.A. Second occurrence of *Odontaspis noronhai* (Maul, 1955). *Boletim do Instituto de Pesca* **1984**, *11*, 69-79.
- Stone, N.R.; Shimada, K. Skeletal Anatomy of the Bigeye Sand Tiger Shark, *Odontaspis noronhai* (Lamniformes: Odontaspidae), and Its Implications for Lamniform Phylogeny, Taxonomy, and Conservation Biology. *Copeia* **2019**, *107*, 632-652, doi:10.1643/CG-18-160.

### Pseudocarchariidae

- Kizhakudan, S.J.; Rajapackiam, S. First report of the crocodile shark *Pseudocarcharias kamoharai* (Matsubara, 1936) from Chennai, southeast coast of India. *Journal of the Marine Biological Association of India* **2013**, *55*, 86-88, doi:10.6024/jmbai.2013.55.1.01734-14.

- Pradeep, H.D.; Swapnil, S.S.; Ramachandran, S.; Pattnayak, S.K. Report of the crocodile shark *Pseudocarcharias kamoharai* (Matsubara, 1936) from deep waters of the Andaman Sea. *Marine Biodiversity* **2016**, *47*, 535–538, doi:10.1007/s12526-016-0499-9.
- Randall, J.E. Randall's tank photos. Collection of 10,000 large-format photos (slides) of dead fishes. Available online: [www.fishbase.org](http://www.fishbase.org) (see species pages for more details) (accessed on June 29).
- Stewart, A.L. First record of the crocodile shark, *Pseudocarcharias kamoharai* (Chondrichthyes: Lamniformes), from New Zealand waters. *New Zealand Journal of Marine and Freshwater Research* **2001**, *35*, 1001–1006, doi:10.1080/00288330.2001.9517059.

## Hexanchiiformes

### Chlamydoselachidae

- Kukuev, E.I.; Pavlov, V.P. The first case of mass catch of a rare frill shark *Chlamydoselachus anguineus* over a seamount of the Mid-Atlantic Ridge. *Journal of Ichthyology* **2008**, *48*, 676–678, doi:10.1134/S0032945208080158.
- Nakaya, K.; Bass, A.J. The frill shark *Chlamydoselachus anguineus* in New Zealand seas. *New Zealand Journal of Marine and Freshwater Research* **1978**, *12*, 397–398, doi:10.1080/00288330.1978.9515767.

### Hexanchiidae

- Anguila, R.; Alvarado, L.E.N.; Barandica, J.C.N.; Beracasa, L.H.; Acero P., A. Ampliación geográfica del tiburón siete branquias o bocadulce *Heptanchias perlo* Bonnaterre (Hexanchiformes: Hexanchidae) para el Caribe continental Columbiano. *Boletín de Investigaciones Marinas y Costeras* **2016**, *45*, 355–360.
- Avalos-Castillo, C.G.; Santana-Morales, O.; Becerril-García, E.E.; Areano, E. New records and morphometry of the Atlantic sixgill shark *Hexanchus vitulus* in the Caribbean coast of Guatemala. *Latin American Journal of Aquatic Research* **2020**, *48*, 488–491, doi:10.3856/vol48-issue3-fulltext-2436.
- Capapé, C.; Rafrafi-Nouira, S.; Ben Amor, K.O.; Ben Amor, M.M. Unusual and substantiated records of *Heptanchias perlo* (Chondrichthyes: Hexanchidae) in the N-E Tunisian waters (Central Mediterranean Sea). *Thalassia Salientia* **2018**, *40*, 17–24, doi:10.1285/i15910725v40p17.
- Ebert, D.A.; White, W.T.; Ho, H.C. Redescription of *Hexanchus nakamurai* Teng 1962, (Chondrichthyes: Hexanchiformes: Hexanchidae), with designation of a neotype. *Zootaxa* **2013**, *3752*, 20–34, doi:10.11646/zootaxa.3752.1.4.
- Garrick, J.A.F.; Paul, L.J. *Heptanchias dakini* Whitley, 1931, a synonym of *H. perlo* (Bonnaterre, 1788), the sharpnose sevengill or Perlon shark, with notes on sexual dimorphism in this species. *Zoology Publications from Victoria University of Wellington* **1971**, *55*, 1–14.
- Imai, C.; Ikeda, I.; Sakai, H. A record of the rare broadnose sevengill shark *Notorynchus cepedianus* off Yamaguchi in the sea of Japan. *Journal of the National Fisheries University* **1995**, *53*, 35–40.
- Kumar, R.; S, V.; K. V, A.; K. K, B.; P. T, R. First report of four deep-sea chondrichthyans (Elasmobranchii and Holocephali) from Andaman waters, India with an updated checklist from the region. *Acta Ichthyologica et Piscatoria* **2018**, *48*, 289–301, doi:10.3750/aiep/02336.
- McLaughlin, D.M.; Morrissey, J.F. New Records of Elasmobranchs from the Cayman Trench, Jamaica. *Bulletin of Marine Science* **2004**, *75*, 481–485.
- Rafrafi-Nouira, S.; El Kamel-Moutalibi, O.; Reynaud, C.; Boumaïza, M.; Capapé, C. Additional and unusual captures of elasmobranch species from the northern coast of Tunisia (central Mediterranean). *Journal of Ichthyology* **2015**, *55*, 836–848, doi:10.1134/S0032945215060181.

- Sadowsky, V. First record of broad-snouted seven-gilled shark from Cananéia, coast of Brazil. *Boletim da Inst. Oceanogr. Sao Paulo* **1970**, *18*, 33–35.
- Scott, E.O.G. Dimensions and form of a seven-gilled shark, *Notorynchus cepedianus* (Péron) from the Tamar estuary, Tasmania. *Records of the Queen Victoria Museum Launceston* **1982**, *76*, 1-14.
- Springer, S.; Waller, R.A. *Hexanchus vitulus*, a New Sixgill Shark from the Bahamas. *Bulletin of Marine Science* **1969**, *19*, 159-174.

## Heterodontiformes

### Heterodontidae

- Baldwin, Z.H. A New Species of Bullhead Shark, Genus *Heterodontus* (Heterodontiformes: Heterodontidae), from Oman. *Copeia* **2005**, *2005*, 262–264, doi:10.1643/ci-04-168r1.

## Orectolobiformes

### Ginglymostomidae

- Fernando Del Moral-Flores, L.; Ramírez-Antonio, E.; Angulo, A.; Pérez-Ponce de León, G. *Ginglymostoma unami* sp. nov. (Chondrichthyes: Orectolobiformes: Ginglymostomatidae): una especie nueva de tiburón gata del Pacífico oriental tropical. *Revista Mexicana de Biodiversidad* **2015**, *86*, 48-58, doi:10.7550/rmb.46192.
- Taniuchi, T.; Yanagisawa, F. Albinism and lack of second dorsal fin in an adult tawny nurse shark, *Nebrius concolor*, from Japan. *Japanese Journal of Ichthyology* **1987**, *34*, 393–395.
- Yoshino, T.; Hiramatsu, W.; Toda, M.; Uchida, S. New records of two sharks, *Nebrius concolor* and *Negaprion acutidens*, from Japanese waters. *Bulletin of the College of Science, University of the Ryukyus* **1981**, *32*, 37–46.

### Hemiscyllidae

- Allen, G.R.; Erdmann, M.V.; Dudgeon, C.L. *Hemiscyllium halmahera*, a new species of Bamboo Shark (Hemiscylliidae) from Indonesia. *Aqua, International Journal of Ichthyology* **2013**, *19*, 123–136.
- Devadoss, P. Studies on the catshark *Chiloscyllium griseum* from Indian waters. *Journal of the Marine Biological Association of India* **1986**, *28*, 192–198.
- Weigmann, S. Contribution to the Taxonomy and Distribution of Six Shark Species (Chondrichthyes, Elasmobranchii) from the Gulf of Thailand. *ISRN Zoology* **2012**, *2012*, 1–24, doi:10.5402/2012/860768.

### Orectolobidae

- Last, P.R.; Chidlow, J.A.; Compagno, L.J.V. A new wobbegong shark, *Orectolobus hutchinsi* n. sp. (Orectolobiformes: Orectolobidae) from southwestern Australia. *Zootaxa* **2006**, *1239*, 35–48, doi:10.11646/zootaxa.1239.1.3.
- Last, P.R.; Pogonoski, J.J.; White, W.T. A new wobbegong shark, *Orectolobus leptolineatus* sp. nov. (Orectolobiformes: Orectolobidae), from the Western Central Pacific. In *Descriptions of New Sharks and Rays from Borneo*, Last, P.R., White, W.T., Pogonoski, J.J., Eds.; CSIRO: Canberra, 2010; pp. 1-16.

### Rhincodontidae

- Gudger, E.W. The fourth florida whale shark, *Rhineodon typus*, and the American Museum model based on it. *Bull Am Mus Nat Hist* **1931**, *41*, 613–656.

- Kasinathan, C.; Muniyandi, K.; Bose, M.; Gandhi, A. Observations on whale shark *Rhineodon typus* (Smith) caught at Pamban Palk Bay and Gulf of Mannar. *Marine Fisheries Information Service, Technical and Extension Series* **2002**, 174, 1015-1016.
- Tomita, T.; Kawai, T.; Matsubara, H.; Kobayashi, M.; Katakura, S. Northernmost record of a whale shark *Rhincodon typus* from the Sea of Okhotsk. *Journal of Fish Biology* **2014**, 84, 243-246, doi:<https://doi.org/10.1111/jfb.12273>.

### **Stegostomatidae**

- Dahl, R.B.; Sigsgaard, E.E.; Mwangi, G.; Thomsen, P.F.; Jørgensen, R.D.; de Oliveira Torquato, F.; Olsen, L.; Møller, P.R. The Sandy Zebra Shark: A New Color Morph of the Zebra Shark *Stegostoma tigrinum*, with a Redescription of the Species and a Revision of Its Nomenclature. *Copeia* **2019**, 107, 524–541, doi:10.1643/CG-18-115.

### **Rhinopristiformes**

- Compagno, L.J.V.; Last, P.R. A new species of wedgefish, *Rhynchobatus springeri* (Rhynchobatoidei, Rhynchobatidae), from the Western Pacific. In *Descriptions of New Sharks and Rays from Borneo*, Last, P.R., White, W.T., Pogonoski, J.J., Eds.; CSIRO: 2010; pp. 77-88.
- Koeda, K.; Itou, M.; Yamada, M.; Motomura, H. *Rhynchobatus mononoke*, a new species of wedgefish (Rhinopristiformes: Rhinidae) from Japan, with comments on *Rhynchobatus laevis* (Bloch and Schneider 1801). *Ichthyological Research* **2020**, 68, 223-238, doi:10.1007/s10228-020-00777-z.
- Rafrafi-Nouira, S.; El Kamel-Moutalibi, O.; Reynaud, C.; Boumaïza, M.; Capapé, C. Additional and unusual captures of elasmobranch species from the northern coast of Tunisia (central Mediterranean). *Journal of Ichthyology* **2015**, 55, 836–848, doi:10.1134/S0032945215060181.
- Wilson, L.; Zacharia, P.U.; Kizhakudan, S.J.; Najmudeen, T.M.; Santhosh, B.; Gop, A.P.; Radhakrishnan, M.; Sunil, K.T.S.; Pakkri Muthu, S. Report on the landing of the critically endangered Rhinopterid *Acroteriobatus variegatus* (Nair & Lal Mohan, 1973) with some insights into its reproductive biology. *Journal of the Marine Biological Association of India* **2020**, 62, 60–64, doi:10.6024/jmbai.2020.62.1.2145-07.

### **Squaliformes**

#### **Centrophoridae**

- Baranes, A. Sharks from the Amirantes Islands, Seychelles, with a description of two new species of squaloids from the deep sea. *Israel Journal of Zoology* **2003**, 49, 33-65.
- Diatta, Y.; Diaby, A.; Rafrafi-Nouira, S.; Capapé, C. Capture of a rare endangered species leafscale gulper shark *Centrophorus squamosus* (Chondrichthyes: Squalidae) from the coast of Senegal (eastern tropical Atlantic). *Annales, Series historia naturalis* **2019**, 29, 205-210, doi:10.19233/ASHN.2019.20.
- Duffy, C.A.J. First record of *Centrophorus harrissoni* from New Zealand, with observations on squamation in Centrophoridae (Squaliformes). *New Zealand Journal of Marine and Freshwater Research* **2007**, 41, 163-173, doi:10.1080/00288330709509905.
- McLaughlin, D.M.; Morrissey, J.F. New Records of Elasmobranchs from the Cayman Trench, Jamaica. *Bulletin of Marine Science* **2004**, 75, 481-485.
- Pradeep, H.D.; Shirke, S.S.; Nashad, M.; Sukham, M.D. A first record of the Smallfin Gulper Shark *Centrophorus moluccensis* Bleeker, 1860 (Chondrichthyes: Squaliformes: Centrophoridae) from the Andaman & Nicobar waters. *Journal of Threatened Taxa* **2017**, 9, 10899–10903, doi:10.11609/jott.3315.9.11.10899-10903.

- Rodríguez-Cabello, C.; Pérez, M.; Grasa, I. Taxonomic research on *Deania calcea* and *Deania profundorum* (Family: Centrophoridae) in the Cantabrian Sea (Northeast Atlantic) with comments on *Deania hystricosa*. *Regional Studies in Marine Science* **2020**, *37*, 101321, doi:<https://doi.org/10.1016/j.rsma.2020.101321>.
- White, W.T.; Ebert, D.A.; Naylor, G.J.; Ho, H.C.; Clerkin, P.; Verissimo, A.; Cotton, C.F. Revision of the genus *Centrophorus* (Squaliformes: Centrophoridae): Part 1--Redescription of *Centrophorus granulosus* (Bloch & Schneider), a senior synonym of *C. acus* Garman and *C. niaukang* Teng. *Zootaxa* **2013**, *3752*, 35-72, doi:10.11646/zootaxa.3752.1.5.
- Wienerroither, R.M.; Bjelland, O.; Bachmann, L.; Junge, C. Northernmost record of the little gulper shark *Centrophorus uyato* in the north-eastern Atlantic Ocean, with taxonomical notes on *Centrophorus zehehaani*. *J Fish Biol* **2015**, *86*, 834-844, doi:10.1111/jfb.12602.

### Dalatiidae

- Da Silva, A.A.; Duarte, P.C.; Giga, A.; Menezes, G. First record of the spined pygmy shark, *Squaliolus laticaudus* (Smith & Radcliffe, 1912) in the Azores, extending its distribution in the north-eastern Atlantic. *Arquipélago* **1998**, *16A*, 57-61.
- Driggers, W.B., III; Burgess, G.H.; Hamilton, A.N., Jr.; Hopkins, N.M.; Schobernd, C.M. *Squaliolus laticaudus* in the Western North Atlantic Ocean: Distributional and Life History Observations. *Bulletin of Marine Science* **2010**, *86*, 831-838, doi:10.5343/bms.2010.1009.
- Garrick, J.A.F.; Springer, S. *Isistius plutodus*, a New Squaloid Shark from the Gulf of Mexico. *Copeia* **1964**, *1964*, 678-682, doi:10.2307/1441443.
- Hulley, P.A.; Penrith, M.J. *Euprotomicroides zantedeschia*, a new genus and species of pigmy dalatiid shark from South Africa. *Bulletin of Marine Science* **1966**, *16*, 222-229.
- Jahn, A.E.; Haedrich, R.L. Notes on the pelagic squaloid shark *Isistius brasiliensis*. *Biological Oceanography* **1988**, *5*, 297-309, doi:10.1080/01965581.1987.10749519.
- Randall, J.E. Randall's tank photos. Collection of 10,000 large-format photos (slides) of dead fishes. Available online: [www.fishbase.org](http://www.fishbase.org) (see species pages for more details) (accessed on June 29).
- Stehlmann, M.F.W.; Van Oijen, M.; Kamminga, P. Re-description of the rare taillight shark *Euprotomicroides zantedeschia* (Squaliformes, Dalatiidae), based on third and fourth record from off Chile *Cybius* **2016**, *40*, 187-197.
- Tagliafico, A.; Rago, N.; Ron, E. Primer reporte de tiburón *Dalatiidae licha* (Bonnaterre, 1788) (Elasmobranchii: Squaliformes: Dalatiidae) para Venezuela y el Mar Caribe. *Boletín del Instituto Oceanográfico de Venezuela* **2007**, *46*, 113-117.

### Etmopteridae

- Shirai, S.; Nakaya, K. A New Squalid Species of the Genus *Centrosyllium* from the Emperor Seamount Chain. *Japanese Journal of Ichthyology* **1990**, *36*, 391-398.
- Wetherbee, B.M.; Kaijura, S.M. Occurrence of a rare squaloid shark, *Trigonognathus kabeyai*, from the Hawaiian islands. *Pacific Science* **2000**, *54*, 389-394.
- Więcaszek, B.; Sobiecka, E.; Panicz, R.; Keszka, S.; Górecka, K.; Linowska, A. First record of the deep-water shark *Etmopterus spinax* (Chondrichthyes: Etmopteridae) from the southern Baltic Sea (Pomeranian Bay). *Oceanologia* **2018**, *60*, 426-430, doi:<https://doi.org/10.1016/j.oceano.2018.02.001>.
- Yano, K. First record of the brown lanternshark, *Etmopterus unicolor*, from the waters around New Zealand, and comparison with the southern lanternshark, *E. granulosus*. *Ichthyological Research* **1997**, *44*, 61-72.

Yano, K.; Mochizuki, K.; Tsukada, O.; Suzuki, K. Further description and notes of natural history of the viper dogfish, *Trigonognathus kabeyai* from the Kumano-nada Sea and the Ogasawara Islands, Japan (Chondrichthyes: Etmopteridae). *Ichthyological Research* **2003**, *50*, 251-258, doi:10.1007/s10228-003-0165-7.

### **Oxynotidae**

Kousteni, V.; Megalofonou, P. Observations on the biological traits of the rare shark *Oxynotus centrina* (Chondrichthyes: Oxynotidae) in the Hellenic Seas. *Journal of Fish Biology* **2016**, *89*, 1880–1888, doi:https://doi.org/10.1111/jfb.13077.

Viana, S.; Lisher, M.W. On the taxonomy of the first record of rare deep-water rough shark species of Oxynotidae (Chondrichthyes: Squaliformes) in the western Indian Ocean. *Journal of Threatened Taxa* **2018**, *10*, doi:10.11609/jott.3916.10.6.11732-11742.

Yano, K.; Matsuura, K.; Tsukada, O. Redescription of the Rare Squaloid Shark *Oxynotus japonicus* from Suruga Bay and the Enshu-nada Sea, Japan. *Species Diversity* **2002**, *7*, 363-369.

### **Somniosidae**

Benz, G.W.; Hocking, R.; Kowunna, A.; Bullard, S.A.; George, J.C. A second species of Arctic shark: Pacific sleeper shark *Somniosus pacificus* from Point Hope, Alaska. *Polar Biology* **2004**, *27*, 250-252, doi:10.1007/s00300-003-0589-6.

Capapé, C.; Rafrafi-Nouira, S.; Diatta, Y.; Christian, R. First record of little sleeper shark, *Somniosus rostratus* (Elasmobranchii: Squaliformes: Somniosidae), from the Tunisian coast, central Mediterranean Sea. *Acta Ichthyologica et Piscatoria* **2020**, *50*, 475-480, doi:10.3750/aiep/02998.

Ebert, D.A.; Compagno, L.J.V.; Natanson, L.J. Biological Notes on the Pacific Sleeper Shark, *Somniosus pacificus* (Chondrichthyes, Squalidae). *California Fish and Game* **1987**, *73*, 117-123.

Ebert, D.A.; Knuckey, J.D.S.; Kamikawa, D.J. First eastern North Pacific record of the velvet dogfish, *Zameus squamulosus* (Chondrichthyes: Squaliformes: Somniosidae). *Marine Biodiversity Records* **2014**, *7*, doi:10.1017/s1755267214000499.

Francis, M.P.; Stevens, J.D.; Last, P.R. New records of *Somniosus* (Elasmobranchii: Squalidae) from Australasia, with comments on the taxonomy of the genus. *New Zealand Journal of Marine and Freshwater Research* **1988**, *22*, 401-409, doi:10.1080/00288330.1988.9516311.

Hsu, H.H.; Lin, C.Y.; Joung, S.J. *Somniosus (Rhinoscyrnus) cheni* sp. nov., A New Species of Sleeper Shark (Squaliformes: Somniosidae) from Eastern Taiwan, with Aspects of Embryo Biology. *Zoological Studies* **2020**, *59*, e48, doi:10.6620/ZS.2020.59-48.

Mas, F.; Forselledo, R.; Domingo, A.; Pin, O.; Troncoso, P.; Errico, E.; Marquez, A.; Tanaka, S.; Weigmann, S. New records and range extension of the Portuguese dogfish *Centroscymnus coelolepis* in the south-western Atlantic Ocean, with comments on its morphology. *Journal of Fish Biology* **2020**, *96*, 601-616, doi:https://doi.org/10.1111/jfb.14246.

Navarro, S.J.; Alayón, J.P.; López Abellán, L.J.; Holtzhausen, J.A.; Jiménez, J.F.G. Seamount associated species (fishes, crustaceans and cephalopods) Namibia-0802. In *Preliminary report of the multidisciplinary research cruise on the Walvis Ridge seamounts (Atlantic Southeast-SEAFO)*; Instituto Español de Oceanografía/National Marine Information and Research Centre: Madrid, 2011; pp. 98-191.

Wetherbee, B.M.; Crow, G.L. First record of the squaloid shark *Scymnodon squamulosus* from the Hawaiian Islands. *Ichthyological Research* **1996**, *43*, 334–339.

White, W.T.; Vaz, D.F.B.; Ho, H.-C.; Ebert, D.A.; de Carvalho, M.R.; Corrigan, S.; Rochel, E.; de Carvalho, M.; Tanaka, S.; Naylor, G.J.P. Redescription of *Scymnodon ichiharai* Yano and Tanaka 1984



- (Squaliformes: Somniosidae) from the western North Pacific, with comments on the definition of somniosid genera. *Ichthyological Research* **2015**, 62, 213-229, doi:10.1007/s10228-014-0430-y.
- Yano, K.; Stevens, J.D.; Compagno, L.J.V. A review of the systematics of the sleeper shark genus *Somniosus* with redescription of *Somniosus (Somniosus) antarcticus* and *Somniosus (Rhinoscyrnus) longus* (Squaliformes: Somniosidae). *Ichthyological Research* **2004**, 51, 360-373, doi:10.1007/s10228-004-0244-4.

## Squalidae

- Baranes, A. Sharks from the Amirantes Islands, Seychelles, with a description of two new species of squaloids from the deep sea. *Israel Journal of Zoology* **2003**, 49, 33-65.
- Daly-Engel, T.S.; Koch, A.; Anderson, J.M.; Cotton, C.F.; Rubbs, R.D. Description of a new deep-water dogfish shark from Hawaii, with comments on the *Squalus mitsukurii* species complex in the West Pacific. *Zookeys* **2018**, 135-157, doi:10.3897/zookeys.798.28375.
- Ebert, D.; Cowley, P.; Compagno, L. First records of the longnose spiny dogfish *Squalus blainvillei* (Squalidae) and the deep-water stingray *Plesiobatis daviesi* (Urolophidae) from South African waters. *African Journal of Marine Science* **2002**, 24, 355-357.
- Ebert, D.A.; White, W.T.; Goldman, K.J.; Compagno, L.J.V.; Daly-Engel, T.S.; Ward, R.D. Resurrection and redescription of *Squalus suckleyi* (Girard, 1854) from the North Pacific, with comments on the *Squalus acanthias* subgroup (Squaliformes: Squalidae). *Zootaxa* **2010**, 2612, doi:10.11646/zootaxa.2612.1.2.
- Garrick, J.A.F.; Paul, L.J. *Cirrhigaleus barbifer* (Fam. Squalidae), a little known Japanese shark from New Zealand waters. *Zoology Publications from Victoria University of Wellington* **1971**, 55, 1-13.
- Kempster, R.M.; Hunt, D.M.; Human, B.A.; Egeberg, C.A.; Collin, S.P. First record of the mandarin dogfish *Cirrhigaleus barbifer* (Chondrichthyes: Squalidae) from Western Australia. *Marine Biodiversity Records* **2013**, 6, e25, doi:10.1017/S175526721300002X.
- Last, P.R.; Edmunds, M.; Yearsley, G.K. Part 2 - *Squalus crassispinus* sp. nov., a new spurdog of the *megalops-cubensis* group from the eastern Indian Ocean. *CSIRO Marine and Atmospheric Research Paper* **2007**, 14, 11-22.
- Last, P.R.; White, W.T.; Motomura, H. Part 6 - Description of *Squalus chloroculus* sp. nov., a new spurdog from southern Australia, and the resurrection of *S. montalbani* Whitley. *CSIRO Marine and Atmospheric Research Paper* **2007**, 14, 55-69.
- McGrourther, M. Portuguese Dogfish, *Centroscymnus coelolepis* Bocage & Capello, 1864. Available online: <https://australian.museum/learn/animals/fishes/portuguese-dogfish-centroscymnus-coelolepis-bocage-capello-1864/> (accessed on July 20).
- McLaughlin, D.M.; Morrissey, J.F. New Records of Elasmobranchs from the Cayman Trench, Jamaica. *Bulletin of Marine Science* **2004**, 75, 481-485.
- Orozco-Velasquez, D.M.; Gomez-Delgado, F.; Salcedo-Reyes, J.C. New record of *Squalus cubensis* Howell Rivero, 1936 (Chondrichthyes, Squalidae) in Colombia. *Universitas Scientiarum* **2016**, 21, 159-166.
- Silas, E.G.; Prasad, N.K. On the occurrence of the deep-water squaloid shark *Squalus fernandinus* Molina from the Continental slope off the west coast of India. *Current Science* **1969**, 38, 1-3.
- White, W.T.; Last, P.R.; Stevens, J.D. *Cirrhigaleus australis* n. sp., a new Mandarin dogfish (Squaliformes: Squalidae) from the south-west Pacific. *Zootaxa* **2007**, 1560, 19-30, doi:10.11646/zootaxa.1560.1.2.

## Squatiniiformes

### Squatinaidae

- Acero P, A.; Tavera, J.J.; Anguila, R.; Hernández, L. A New Southern Caribbean Species of Angel Shark (Chondrichthyes, Squaliformes, Squatinidae), Including Phylogeny and Tempo of Diversification of American Species. *Copeia* **2016**, *104*, 577-585, doi:10.1643/Ci-15-292.
- Akyol, O.; Unal, V.; Capape, C. Occurrence and Biological Observations on Angel shark *Squatina squatina* (Chondrichthyes: Squatinidae) from the Turkish Waters (Eastern Mediterranean). *Turkish Journal of Fisheries and Aquatic Sciences* **2015**, *15*, 931–935, doi:10.4194/1303-2712-v15\_4\_17.
- Ergenler, A.; Turan, F.; Turan, C. Occurrence of A Sawback Angelshark (*Squatina aculeata* Cuvier, 1829) from the Iskenderun Bay, North-Eastern Mediterranean Coast of Turkey. *Biharean Biologist* **2020**, *14*, 57-59.
- Ergüden, D.; Ayas, D.; Gürlek, M.; Karan, S.; Turan, C. First documented smoothback angelshark *Squatina oculata* Bonaparte, 1840 from the North-Eastern Mediterranean Sea, Turkey. *Cahiers de Biologie Marine* **2019**, *60*, 189-194.
- Vaz, D.F.B.; Carvalho, M., R., de. New Species of *Squatina* (Squatiniformes: Squatinidae) from Brazil, with Comments on the Taxonomy of Angel Sharks from the Central and Northwestern Atlantic. *Copeia* **2018**, *106*, 144-160, doi:10.1643/Ci-17-606.
- Yığın, C.Ç.; İşmen, A.; Daban, B.; Cabbar, K.; Önal, U. Recent findings of rare sharks, *Squatina oculata* Bonaparte, 1840 and *Squatina squatina* (Linnaeus, 1758) from Gökçeada Island, Northern Aegean Sea, Turkey. *Journal of the Black Sea* **2019**, *25*, 305–314.

## Multiple Groups

- Al-Shajibi, S.R.; Chesalin, M.V.; Al-Shagaa, G.A. New Records of Sharks from Southern Coastal Waters of Oman in the Arabian Sea. *Pakistan Journal of Zoology* **2014**, *46*, 281–284.
- Branstetter, S.; McEachran, J.D. A First Record of *Odontaspis noronhai* (Lamniformes: Odontaspidae) for the Western North Atlantic, with Notes on Two Uncommon Sharks from the Gulf of Mexico. *Northeast Gulf Science* **1986**, *8*, 1–8, doi:10.18785/negs.0802.08.
- Compagno, L.J.V.; Smale, M.J. Recent records of four warm-water elasmobranchs from the eastern Cape Province, South Africa. *South African Journal of Marine Science* **1986**, *4*, 11–15, doi:10.2989/025776186784461873.
- González-Acosta, A.F.; Rodiles-Hernández, R.; González-Díaz, A.A.; Mendoza-Carranza, M. Notes on the Presence of *Mustelus sinus mexicanus* and *Hexanchus nakamurai* (Chondrichthyes: Elasmobranchii) in Mexican waters. *Journal of Aquaculture & Marine Biology* **2017**, *5*, 1–6, doi:10.15406/jamb.2017.05.00133.

## Length-Weight Equations

**Note:** This section is only for references used to estimate the weights of unweighed specimens only. If the specimen had body measurements in it beyond length, or if that paper provided a length-weight equation in addition to specimen measurements, it is listed above.

## Chondrichthyes

### *Carcharhiniformes*

#### **Carcharhinidae**

- Barnes, A.; Sutaria, D.; Harry, A.V.; Jabado, R.W. Demographics and length and weight relationships of commercially important sharks along the north-western coast of India. *Aquatic Conservation: Marine and Freshwater Ecosystems* **2018**, *28*, 1374-1383, doi:https://doi.org/10.1002/aqc.2940.
- Cliff, G.; Dudley, S.F.J. Sharks caught in the protective gill nets off Natal, South Africa. 4. The bull shark *Carcharhinus leucas* Valenciennes. *South African Journal of Marine Science* **1991**, *10*, 253-270, doi:10.2989/02577619109504636.
- Gladston, Y.; Akhilesh, K.V.; Thakurdas, C.; Ravi, O.P.K.; Ajina, S.M.; Shenoy, L. Length–weight relationship of selected elasmobranch species from north-eastern Arabian Sea, India. *Journal of Applied Ichthyology* **2018**, *34*, 753-757, doi:https://doi.org/10.1111/jai.13680.
- Karim, E.; Zaher, M.; Barua, S.; Rahman, M.J.; Hoq, M.E. Catch composition, seasonal abundance and length-weight relationship of elasmobranch species of the Bay of Bengal, Bangladesh *Bangladesh Journal of Fish Research* **2011**, *15-16*, 115-124.
- Kohler, N.E.; Casey, J.G.; Turner, P.A. *Length-length and length-weight relationships for 13 shark species from the western North Atlantic*. NOAA Tech Memo NMFS-NE-110; NOAA: Washington D.C., 1996.
- Krishnamoorthi, B.; Jagadis, I. Biology and population dynamics of the grey dogshark, *Rhizoprionodon* (*Rhizoprionodon*) *acutus* (Ruppell) in Madras waters. *Indian Journal of Fisheries* **1986**, *33*, 381-385.
- Kulbicki, M.; Guillemot, N.; Amand, M. A general approach to length-weight relationships for New Caledonian lagoon fishes. *Cybium* **2005**, *29*, 232-252.
- Kurniawan, W.; Oktaviyani, S.; Suparmo; Fahmi. Length-weight and length-length relationships for eight shark species from Indonesian waters. *Journal of Applied Ichthyology* **2022**, doi:10.1111/jai.14346.
- Mathew, C.J.; Devaraj, M. The biology and population dynamics of the spadenose shark *Scoliodon laticaudus* in the coastal waters of Maharashtra State, India. *Indian Journal of Fisheries* **1997**, *44*, 11–27.
- Motta, F.S.; Caltabellotta, F.P.; Namora, R.C.; Gadig, O.B.F. Length-weight relationships of sharks caught by artisanal fisheries from southeastern Brazil. *Journal of Applied Ichthyology* **2014**, *30*, 239-240, doi:10.1111/jai.12234.
- Pulver, J.R.; Whatley, A. Length-weight relationships, location, and depth distributions for select Gulf of Mexico reef fish species. *NOAA Technical Memorandum* **2016**, NMFS-SEFSC-693, 1-100, doi:10.7289/V58G8HQ2.
- Raeisi, H.; Kamrani, E.; Patimar, R.; Sourinejad, I.; Haghparast, S.; Rahnema, B. Length-weight relationships of four sharks caught in the Northern Persian Gulf and Oman Sea. *Journal of Applied Ichthyology* **2017**, *33*, 613-614, doi:https://doi.org/10.1111/jai.13272.
- Tavares, R. Análisis de abundancia, distribución y tallas de tiburones capturados por pesca artesanal en el parque nacional archipiélago los roques, Venezuela. *Interciencia* **2009**, *34*, 463-470.
- Tyabji, Z.; Wagh, T.; Patankar, V.; Jabado, R.W.; Sutaria, D. Catch composition and life history characteristics of sharks and rays (Elasmobranchii) landed in the Andaman and Nicobar Islands, India. *PLOS ONE* **2020**, *15*, e0231069, doi:10.1371/journal.pone.0231069.
- Wetherbee, B.M.; Crow, G.L.; Lowe, C.G. Biology of the Galapagos shark, *Carcharhinus galapagensis*, in Hawai'i. *Environ Biol Fish* **1996**, *45*, 299-310, doi:10.1007/BF00003099.

## Hemigaleidae

- Kurniawan, W.; Oktaviyani, S.; Suparmo; Fahmi. Length-weight and length-length relationships for eight shark species from Indonesian waters. *Journal of Applied Ichthyology* **2022**, doi:10.1111/jai.14346.

Stevens, J.D.; Cuthbert, G.J. Observations on the Identification and Biology of *Hemigaleus* (Selachii: Carcharhinidae) from Australian Waters. *Copeia* **1983**, 1983, 487–497, doi:10.2307/1444394.

Tyabji, Z.; Wagh, T.; Patankar, V.; Jabado, R.W.; Sutaria, D. Catch composition and life history characteristics of sharks and rays (Elasmobranchii) landed in the Andaman and Nicobar Islands, India. *PLOS ONE* **2020**, 15, e0231069, doi:10.1371/journal.pone.0231069.

#### **Pentachidae**

Akhilesh, K.V. Fishery and biology of deep-sea chondrichthyans off the southwest coast of India. Cochin University of Science and Technology, Kerala, 2014.

#### **Proscyllidae**

Froese, R.; Thorson, J.T.; Reyes, R.B. A Bayesian approach for estimating length-weight relationships in fishes. *Journal of Applied Ichthyology* **2014**, 30, 78-85, doi:10.1111/jai.12299.

#### **Pseudotriakidae**

Weigmann, S. Contribution to the Taxonomy and Distribution of Six Shark Species (Chondrichthyes, Elasmobranchii) from the Gulf of Thailand. *ISRN Zoology* **2012**, 2012, 1–24, doi:10.5402/2012/860768.

Yano, K.; Musick, J.A. Comparison of Morphometrics of Atlantic and Pacific Specimens of the False Catshark, *Pseudotriakis microdon*, with Notes on Stomach Contents. *Copeia* **1992**, 1992, 877–886, doi:10.2307/1446165.

#### **Scyliorhinidae**

Horn, P.L. Biology of the New Zealand carpet shark *Cephaloscyllium isabellum* (Scyliorhinidae). *Journal of Ichthyology* **2016**, 56, 336–347, doi:10.1134/s0032945216030048.

Ismen, A.; Cigdem Yigin, C.; Altinagac, U.; Ayaz, A. Length–weight relationships for ten shark species from Saros Bay (North Aegean Sea). *Journal of Applied Ichthyology* **2009**, 25, 109–112, doi:https://doi.org/10.1111/j.1439-0426.2009.01263.x.

#### **Triakidae**

Frøta, L.O.; Costa, P.A.S.; Braga, A.C. Length-weight relationships of marine fishes from the central Brazilian coast. *Naga* **2004**, 27, 20–26.

Williams, C.M.; Williams, J.P.; Claisse, J.T.; Pondella, D.J.; Domeier, M.L.; Zahn, L.A. Morphometric Relationships of Marine Fishes Common to Central California and the Southern California Bight. *Bulletin, Southern California Academy of Sciences* **2013**, 112, 217–227, doi:10.3160/0038-3872-112.3.217.

Yano, K. Reproductive biology of the slender smoothhound, *Gollum attenuatus*. *Environ Biol Fish* **1993**, 38, 59–71.

#### *Chimaeriformes*

##### **Rhinochimaeridae**

Finucci, B. Ecology of New Zealand deep-sea Chondrichthyans. Victoria University of Wellington, Wellington, 2017.

#### *Echinorhiniformes*

##### **Echinorhinidae**

Akhilesh, K.V. Fishery and biology of deep-sea chondrichthyans off the southwest coast of India. Cochin University of Science and Technology, Kerala, 2014.

#### *Hexanchiiformes*

##### **Chlamydoselachidae**

Kukuev, E.I.; Pavlov, V.P. The first case of mass catch of a rare frill shark *Chlamydoselachus anguineus* over a seamount of the Mid-Atlantic Ridge. *Journal of Ichthyology* **2008**, *48*, 676–678, doi:10.1134/S0032945208080158.

##### **Hexanchiidae**

Güven, O.; Kebapçioğlu, T.; Deval, M.C. Length-weight relationships of sharks in Antalya Bay, eastern Mediterranean. *Journal of Applied Ichthyology* **2012**, *28*, 278–279, doi:10.1111/j.1439-0426.2011.01823.x.

Irigoyen, A.J.; De Wysiecki, A.M.; Trobbiani, G.; Bovcon, N.; Awruch, C.A.; Argemi, F.; Jaureguizar, A.J. Habitat use, seasonality and demography of an apex predator: sevengill shark *Notorynchus cepedianus* in northern Patagonia. *Marine Ecology Progress Series* **2018**, *603*, 147–160, doi:10.3354/meps12715.

Kurniawan, W.; Oktaviyani, S.; Suparmo; Fahmi. Length-weight and length-length relationships for eight shark species from Indonesian waters. *Journal of Applied Ichthyology* **2022**, doi:10.1111/jai.14346.

Pulver, J.R.; Whatley, A. Length-weight relationships, location, and depth distributions for select Gulf of Mexico reef fish species. *NOAA Technical Memorandum* **2016**, NMFS-SEFSC-693, 1–100, doi:10.7289/V58G8HQ2.

#### *Lamniformes*

##### **Alopiidae**

Kohler, N.E.; Casey, J.G.; Turner, P.A. *Length-length and length-weight relationships for 13 shark species from the western North Atlantic*. NOAA Tech Memo NMFS-NE-110; NOAA: Washington D.C., 1996.

##### **Lamnidae**

Kohler, N.E.; Casey, J.G.; Turner, P.A. *Length-length and length-weight relationships for 13 shark species from the western North Atlantic*. NOAA Tech Memo NMFS-NE-110; NOAA: Washington D.C., 1996.

Mollet, H.F.; Cailliet, G.M. Using allometry to predict body mass from linear measurements of the white shark. In *Great White Sharks: The Biology of Carcharodon carcharias*, Klimley, A.P., Ainley, D.G., Eds.; Academic Press: New York, 1996; pp. 81–89.

##### **Mitsukuriniidae**

Yano K, Miya M, Aizawa M, and Noichi T. Some aspects of the biology of the goblin shark, *Mitsukurina owstoni*, collected from the Tokyo Submarine Canyon and adjacent waters, Japan. *Ichthyological Research* **2007**, *54*:388–398. DOI 10.1007/s10228-007-0414-2.

#### *Orectolobiformes*

##### **Ginglymostomidae**

Castro, J.I. The Biology of the Nurse Shark, *Ginglymostoma cirratum*, Off the Florida East Coast and the Bahama Islands. *Environ Biol Fish* **2000**, 58, 1-22, doi:10.1023/A:1007698017645.

### **Orectolobidae**

Huveneers, C.; Otway, N.M.; Harcourt, R.G. Morphometric Relationships and Catch Composition of Wobbegong Sharks (Chondrichthyes: Orectolobus) Commercially Fished in New South Wales, Australia. *Proceedings of the Linnean Society of New South Wales* **2007**, 128, 243-250.

### **Rhincodontidae**

Hsu, H.H.; Joung, S.J.; Liu, K.M. Fisheries, management and conservation of the whale shark *Rhincodon typus* in Taiwan. *Journal of Fish Biology* **2012**, 80, 1595-1607, doi:10.1111/j.1095-8649.2012.03234.x.

### *Rhinopristidae*

### **Rhinidae**

Gladston, Y.; Akhilesh, K.V.; Thakurdas, C.; Ravi, O.P.K.; Ajina, S.M.; Shenoy, L. Length–weight relationship of selected elasmobranch species from north-eastern Arabian Sea, India. *Journal of Applied Ichthyology* **2018**, 34, 753-757, doi:https://doi.org/10.1111/jai.13680.

### *Squaliformes*

### **Centrophoridae**

Casas, J.M.; Piñeiro, C.; Bañón, R. Maturity and Other Biological Aspects of Main Deep-water Squaloid Sharks, in the North and Northwest of the Iberian Peninsula (ICES Divisions VIIIc, IXa and IXb). **2001**.

### **Dalatiidae**

Driggers, W.B., III; Burgess, G.H.; Hamilton, A.N., Jr.; Hopkins, N.M.; Schobernd, C.M. *Squaliolus laticaudus* in the Western North Atlantic Ocean: Distributional and Life History Observations. *Bulletin of Marine Science* **2010**, 86, 831-838, doi:10.5343/bms.2010.1009.

Largacha, A.; Bernardes, B.; Gonzalez, M.; Amorim, A. Captura incidental de tubarão-charuto (*Isistius brasiliensis*) (Squaliformes, Squalidae), da pesca atuneira no Sudeste e Sul do Brasil. *XIII Simpósio de Biologia Marinha, Santos/SP, 28/06 a 02/07/10 Resumo Expandido 111* **2010**, 4.

### **Etmopteridae**

Finucci, B. Ecology of New Zealand deep-sea Chondrichthyans. Victoria University of Wellington, Wellington, 2017.

Torres, M.A.; Ramos, F.; Sobrino, I. Length–weight relationships of 76 fish species from the Gulf of Cadiz (SW Spain). *Fisheries Research* **2012**, 127-128, 171-175, doi:10.1016/j.fishres.2012.02.001.

Yano, K.; Mochizuki, K.; Tsukada, O.; Suzuki, K. Further description and notes of natural history of the viper dogfish, *Trigonognathus kabeyai* from the Kumano-nada Sea and the Ogasawara Islands, Japan (Chondrichthyes: Etmopteridae). *Ichthyological Research* **2003**, 50, 251-258, doi:10.1007/s10228-003-0165-7.

### **Somniosidae**

- Barría, C.; Navarro, J.; Coll, M.; Fernandez-Arcaya, U.; Sáez-Liante, R. Morphological parameters of abundant and threatened chondrichthyans of the northwestern Mediterranean Sea. *Journal of Applied Ichthyology* **2015**, *31*, 114-119, doi:10.1111/jai.12499.
- Finucci, B. Ecology of New Zealand deep-sea Chondrichthyans. Victoria University of Wellington, Wellington, 2017.
- Nielsen, J.; Hedeholm, R.B.; Simon, M.; Steffensen, J.F. Distribution and feeding ecology of the Greenland shark (*Somniosus microcephalus*) in Greenland waters. *Polar Biology* **2014**, *37*, 37-46, doi:10.1007/s00300-013-1408-3.
- Orlov, A.; Binohlan, C. Length–weight relationships of deep-sea fishes from the western Bering Sea. *Journal of Applied Ichthyology* **2009**, *25*, 223-227, doi:https://doi.org/10.1111/j.1439-0426.2009.01215.x.
- Wetherbee, B.M.; Crow, G.L. First record of the squaloid shark *Scymnodon squamulosus* from the Hawaiian Islands. *Ichthyological Research* **1996**, *43*, 334–339.

### Squalidae

- Cotton, C.F.; Grubbs, R.D.; Daly-Engel, T.S.; Lynch, P.D.; Musick, J.A. Age, growth and reproduction of a common deep-water shark, shortspine spurdog (*Squalus cf. mitsukurii*), from Hawaiian waters. *Marine and Freshwater Research* **2011**, *62*, 811-822.
- Fahmi, F.; Sentosa, A.A. Biology and fisheries aspects of Western Longnose Spurdog, *Squalus edmundsi* from the Eastern Indian Ocean, Indonesia. *Biodiversitas Journal of Biological Diversity* **2017**, *18*, 1714-1722, doi:10.13057/biodiv/d180451.
- Finucci, B. Ecology of New Zealand deep-sea Chondrichthyans. Victoria University of Wellington, Wellington, 2017.
- Graham, K.J. Distribution, population structure and biological aspects of *Squalus* spp. (Chondrichthyes: Squaliformes) from New South Wales and adjacent Australian waters. *Marine and Freshwater Research* **2005**, *56*, doi:10.1071/mf04275.
- Güven, O.; Kebapçioğlu, T.; Deval, M.C. Length-weight relationships of sharks in Antalya Bay, eastern Mediterranean. *Journal of Applied Ichthyology* **2012**, *28*, 278-279, doi:10.1111/j.1439-0426.2011.01823.x.
- Hazin, F.H.V.; Fischer, A.F.; Broadhurst, M.K.; Veras, D.; Oliveira, P.G.; Burgess, G.H. Notes on the reproduction of *Squalus megalops* off northeastern Brazil. *Fisheries Research* **2006**, *79*, 251–257, doi:https://doi.org/10.1016/j.fishres.2006.04.006.
- Orlov, A.; Binohlan, C. Length–weight relationships of deep-sea fishes from the western Bering Sea. *Journal of Applied Ichthyology* **2009**, *25*, 223-227, doi:https://doi.org/10.1111/j.1439-0426.2009.01215.x.
- Pulver, J.R.; Whatley, A. Length-weight relationships, location, and depth distributions for select Gulf of Mexico reef fish species. *NOAA Technical Memorandum* **2016**, NMFS-SEFSC-693, 1-100, doi:10.7289/V58G8HQ2.
- Rochowski, B.E.A.; Graham, K.J.; Day, R.W.; Walker, T.I. Reproductive biology of the greeneye spurdog *Squalus chloroculus* (Squaliformes, Squalidae). *Journal of Fish Biology* **2015**, *86*, 734-754, doi:https://doi.org/10.1111/jfb.12593.

### Basal Actinopterygii

#### *Acipenseriformes*

#### Acipenseridae

- Helms, D.R. "Age and Growth of Shovelnose Sturgeon, *Scaphirhynchus platyrhynchus* (Rafinesque), in the Mississippi River. *Proceedings of the Iowa Academy of Science* **1974**, *81*, 73-75.



Huff, J.A. Life history of Gulf of Mexico sturgeon, *Acipenser oxyrinchus desotoi* in Suwanee River, Florida. *Florida Marine Research Publications* **1975**, *16*, 1-32.

### **Polyodontidae**

Rosen, R.S. Distribution, Age, and Growth, and Feeding Ecology of Paddlefish (*Polyodon spathula*) In Unaltered Missouri River, South Dakota. South Dakota State University, Brookings, 1976.

### *Polypteriformes*

#### **Polypteridae**

Ibala Zamba, A.; Vreven, E.; Mamonekene, V.; Musschoot, T.; Poaty Ngot, H.F.; Snoeks, J. Length-weight relationships of 37 freshwater fish species from the Lefini river, middle Congo River basin (Republic of the Congo). *Journal of Applied Ichthyology* **2020**, *36*, 352-357, doi:10.1111/jai.14021.

### *Lepisosteiformes*

#### **Lepisosteidae**

Bister, T.J.; Willis, D.W.; Brown, M.L.; Jordan, S.M.; Neumann, R.M.; Quist, M.C.; Guy, C.S. Proposed Standard Weight (Ws) Equations and Standard Length Categories for 18 Warmwater Nongame and Riverine Fish Species. *North American Journal of Fisheries Management* **2000**, *20*, 570-574, doi:10.1577/1548-8675(2000)020<0570:Pswwse>2.3.Co;2.

### *Amiiformes*

#### **Amiidae**

Koch, J.D.; Quist, M.C.; Hansen, K.A.; Jones, G.A. Population dynamics and potential management of bowfin (*Amia calva*) in the upper Mississippi River. *Journal of Applied Ichthyology* **2009**, *25*, 545-550, doi:https://doi.org/10.1111/j.1439-0426.2009.01248.x.

### **Basal Teleostei**

### *Osteoglossiformes*

#### **Osteoglossidae**

Martinelli, N.M.C.; Petrere, M., Jr. Morphometric relationships and indirect determination of the length frequency structure of the piracucu, *Arapaima gigas* (Cuvier), in Brazilian Amazonia. *Fisheries Management and Ecology* **1999**, *5*, 233-240.

Tah, L.; Gouli, G.B.; Da Costa, K.S. Length-weight relationships for 36 freshwater fish species from two tropical reservoirs: Ayamé I and Buyo, Côte d'Ivoire. *Revista de Biología Tropical* **2012**, *60*, 1847-1856.

### *Hiodontiformes*

#### **Hiodontidae**

Talajic, F. Age, growth, food, sexual dimorphism, maturity, fecundity, and proximate analysis of mooneye, *Hiodon tergisus*, Le Sueur, in two areas of the Ottawa River. University of Ottawa, Ottawa, 1980.

### *Albuliformes*

#### **Albulidae**



Crabtree, R.E.; Harnden, C.W.; Snodgrass, D.; Stevens, C. Age, growth, and mortality of bonefish, *Albula vulpes*, from the waters of the Florida Keys. *Fishery Bulletin* **1996**, *94*, 442-451.

#### *Anguilliformes*

##### **Anguillidae**

Jessop, B.M. American Eel Fecundity and Ovary Maturation in Relation to Body Size and Geographic Distribution. *Marine and Coastal Fisheries* **2018**, *10*, 169-189, doi:10.1002/mcf2.10011.

##### **Congridae**

Hood, P.B.; Able, K.W.; Grimes, C.B. Biology of the conger eel *Conger oceanicus* in the Mid-Atlantic Bight. *Marine Biology* **1988**, *98*, 587-596, doi:10.1007/BF00391549.

##### **Muraenidae**

Kulbicki, M.; Guillemot, N.; Amand, M. A general approach to length-weight relationships for New Caledonian lagoon fishes. *Cybium* **2005**, *29*, 232-252.

#### *Ostariophysi*

#### *Alepocephaliformes*

##### **Alepocephalidae**

Meiners-Mandujano, C.; Fernandez-Peralta, L.; Faraj, A.; García-Cancela, R. Length–weight relations of 15 deep-sea fish species (Actinopterygii) from the north-western African continental slope. *Acta Ichthyologica et Piscatoria* **2018**, *48*, 195-198, doi:10.3750/aiep/02042.

#### *Characiformes*

##### **Characidae**

Giarrizzo, T.; de Sena Oliveira, R.R.; Costa Andrade, M.; Pedrosa Gonçalves, A.; Barbosa, T.A.P.; Martins, A.R.; Marques, D.K.; Brito dos Santos, J.L.; de Paula da Silva Frois, R.; Oliveira de Albuquerque, T.P.; et al. Length–weight and length–length relationships for 135 fish species from the Xingu River (Amazon Basin, Brazil). *Journal of Applied Ichthyology* **2015**, *31*, 415–424, doi:https://doi.org/10.1111/jai.12677.

##### **Serrasalminidae**

Villacorta-Correa, M.A.; Saint-Paul, U. Structural indexes and sexual maturity of tambaqui *Colossoma macropomum* (Cuvier, 1818) (Characiformes: Characidae) in central Amazon, Brazil. *Revista Brasileira de Zoologia* **1999**, *59*, 637-652, doi:10.1590/s0034-71081999000400013.

#### *Clupeiformes*

##### **Clupeidae**

Bodola, A. The life history of the gizzard shad, *Dorosoma cepedianum* (Lesueur), in Western Lake Erie. Ohio State University, Columbus, 1955.

Rand, P.S.; Lantry, B.F.; O'Gorman, R.; Owens, R.W.; Stewart, D.J. Energy Density and Size of Pelagic Prey Fishes in Lake Ontario, 1978–1990: Implications for Salmonine Energetics. *Transactions of the American Fisheries Society* **1994**, *123*, 519-534, doi:10.1577/1548-8659(1994)123<0519:Edasop>2.3.Co;2.

## Dussumieridae

Mehanna, S.F.; Osman, A.G.M.; Farrag, M.M.S.; Osman, Y.A.A. Age and growth of three common species of goatfish exploited by artisanal fishery in Hurghada fishing area, Egypt. *Journal of Applied Ichthyology* **2018**, *34*, 917-921, doi:10.1111/jai.13590.

## Engraulidae

Patadiya, D.S.; Mogalekar, H.S.; Sudhan, C.; Jawahar, P.; Jayakumar, N.; Pereira, J.J. Length weight relationship and biology of *Thryssa setirostris* (Broussonet 1782) from the coast of Thoothukudi, Tamil Nadu, India. *Journal of the Marine Biological Association of India* **2021**, *63*, 49-55, doi:10.6024/jmbai.2021.63.1.2238-07.

Salarpouri, A.; Kamrani, E.; Kaymaram, F.; Mahdavi Najafabadi, R. Growth, mortality and exploitation of buccaneer anchovy (*Encrasicholina punctifer* Fowler, 1938) from the north Persian Gulf and Oman Sea. *Iranian Journal of Fisheries Science* **2018**, *17*, 313-326, doi:10.22092/IJFS.2018.115488.

## Cypriniformes

### Cyprinidae

Mohamad, A.; Sharir, S.; Farinordin, F.A.; Zakeyuddin, M.S.; Shukor, A.M.; Samat, A.; Nor, S.M. Length-Weight Relationship and Relative Condition Factor of *Tor Tambra* in Tembat Reservoir, Terengganu, Peninsular Malaysia: Indication of Environmental Health. In Proceedings of the ICDSME 2019, Singapore, 2020//, 2020; pp. 447-456.

Pinder, A.C.; Raghavan, R.; Bower, S.D.; Britton, J.R. Length-weight relationships of two conservation-concern mahseers (Teleostei: Cyprinidae: Tor) of the river Cauvery, Karnataka, India. *Journal of Threatened Taxa* **2020**, *12*, 16257-16261, doi:10.11609/jott.6201.12.10.16257-16261.

Renjithkumar, C.R.; Roshni, K.; Kurup, B.M. Length–weight relationships of three freshwater cyprinid fish species from Chalakudy River, South Western Ghats, India. *Journal of Applied Ichthyology* **2016**, *32*, 1340-1341, doi:https://doi.org/10.1111/jai.13196.

## Gymnotiformes

### Gymnotidae

Mendes-Junior, R.N.G.; Sá-Oliveira, J.C.; Ferrari, S.F. Biology of the electric eel, *Electrophorus electricus*, Linnaeus, 1766 (Gymnotiformes: Gymnotidae) on the floodplain of the Curiaú River, eastern Amazonia. *Reviews in Fish Biology and Fisheries* **2015**, *26*, 83-91, doi:10.1007/s11160-015-9407-9.

Ribeiro, C.R.S.; Garcia, D.A.Z.; Costa, A.D.A.; Yabu, M.H.S.; Casimiro, A.C.R.; Vidotto-Magnoni, A.P.; Orsi, M.L. Length-weight relationships of fish species from Lower Paranapanema River Basin, Upper Paraná River Basin, Brazil. *Journal of Applied Ichthyology* **2017**, *33*, 1038-1039, doi:10.1111/jai.13415.

## Siluriformes

### Ariidae

Coello, D.; Herrera, M.; Zambrano, R. Length-weight relationship of 74 fish species caught in the continental coast of Ecuador. *Journal of Applied Ichthyology* **2020**, *37*, 129-134, doi:10.1111/jai.14113.

- De la Hoz-M, J.; Narváez Barandica, J.C.; Solano, O.D. Length-weight relationships for 36 fish populations from a disturbed tropical estuary in northern Colombia. *Journal of Applied Ichthyology* **2009**, *25*, 618-619, doi:10.1111/j.1439-0426.2009.01316.x.
- Vega-Cendejas, M.; Peralta-Meixuero, M.; Hernández de Santillana, M. Length-weight relations of fishes inhabiting a hyperhaline coastal lagoon in Yucatan, Mexico. *Acta Ichthyologica et Piscatoria* **2017**, *47*, 411-415, doi:10.3750/aiep/02239.
- Viana, A.P.; Lucena-Frédou, F.; Ménard, F.; Frédou, T.; Ferreira, V.; Lira, A.S.; Le Loc'h, F. Length-weight relations of 70 fish species from tropical coastal region of Pernambuco, Northeast Brazil. *Acta Ichthyologica et Piscatoria* **2016**, *46*, 271-277, doi:10.3750/aip2016.46.3.12.

### Heptapteridae

- Batista-Silva, V.F.; Bailly, D.; Kashiwaqui, E.A.L.; Abelha, M.C.F.; Graça, W.J. Length-weight relationships for 55 freshwater fish species from the Iguatemi River, Upper Paraná River basin, Brazil. *Journal of Applied Ichthyology* **2015**, *31*, 257-260, doi:10.1111/jai.12654.
- Rodríguez-Olarte, D.; Taphorn, D.C.; Agudelo-Zamora, H. Length-weight relationships of fishes from western Caribbean freshwater drainages of Venezuela. *Journal of Applied Ichthyology* **2018**, *35*, 600-604, doi:10.1111/jai.13839.
- Silveira, E.L.; Vaz-dos-Santos, A.M. Length-weight relationships for 22 neotropical freshwater fishes from a subtropical river basin. *Journal of Applied Ichthyology* **2015**, *31*, 552-554, doi:https://doi.org/10.1111/jai.12699.
- Tobes, I.; Miranda, R.; Gaspar, S.; Peláez-Rodríguez, M. Morphometric relations of freshwater fishes of the Suaza river (Huila department, Colombia). *Acta Ichthyologica et Piscatoria* **2016**, *46*, 137-140, doi:10.3750/AIP2016.46.2.11.

### Ictaluridae

- Bister, T.J.; Willis, D.W.; Brown, M.L.; Jordan, S.M.; Neumann, R.M.; Quist, M.C.; Guy, C.S. Proposed Standard Weight (Ws) Equations and Standard Length Categories for 18 Warmwater Nongame and Riverine Fish Species. *North American Journal of Fisheries Management* **2000**, *20*, 570-574, doi:10.1577/1548-8675(2000)020<0570:Pswwse>2.3.Co;2.
- Brown, M.L.; Jaramillo, F.; Gatlin, D.M.; Murphy, B.R. A Revised Standard Weight (Ws) Equation for Channel Catfish. *Journal of Freshwater Ecology* **1995**, *10*, 295-302, doi:10.1080/02705060.1995.9663448.
- Burr, B.M.; Mayden, R.L. Life History of the Brindled Madtom *Noturus miurus* in Mill Creek, Illinois (Pisces: Ictaluridae). *The American Midland Naturalist* **1982**, *107*, 25-41, doi:10.2307/2425186.
- Gilbert, C.R. Age and growth of the yellow stone catfish, *Noturus flavus* (Rafinesque). The Ohio State University, Columbus, 1953.

### Pangasiidae

- Ajith Kumar, T.T.; Kumar, S.; K. Lal, K. Length-weight relationship of a newly described catfish *Pangasius silasi* Dwivedi et al., 2017 from Nagarjuna Sagar Dam, Telengana, India. *Indian Journal of Fisheries* **2020**, *67*, doi:10.21077/ijf.2019.67.2.88546-19.

### Pimelodidae

- da Silva, R.S.; Corrêa, F.; de Oliveira, L.P.; Vieira, L.J.S. Length-weight relation of the 14 fish species occurring on sandy beaches along a tropical river in the Amazon. *Journal of Applied Ichthyology* **2019**, *35*, 622-624, doi:10.1111/jai.13852.

- de Assumpção, L.; Fávaro, L.F.; Makrakis, S.; Sarai da Silva, P.; Pini, S.F.R.; Kashiwaqui, E.A.L.; Makrakis, M.C. Population structure and reproduction of *Steindachneridion melanodermatum* (Siluriformes: Pimelodidae), a large catfish endemic to Neotropical ecoregion. *Marine and Freshwater Research* **2021**, *72*, 1004-1018, doi:10.1071/mf19373.
- de Oliveira Nuñez, A.P.; Zaniboni-Filho, E. Length-weight relationships of fish species caught in the Upper Uruguay River, Brazil. *Journal of Applied Ichthyology* **2009**, *25*, 362-364, doi:10.1111/j.1439-0426.2009.01233.x.
- Hernández-Serna, A.; Márquez-Velásquez, V.; Carvajal-Quintero, J.D.; Gulfo, A.; Granado-Lorencio, C.; Jiménez-Segura, L.F. Length-weight relationships of 38 fish species of the Magdalena River floodplain lakes. *Journal of Applied Ichthyology* **2014**, *30*, 549-551, doi:10.1111/jai.12379.
- Lubich, C.C.F.; Olentino, D.; de C. Freitas, C.E.; Yamamoto, K.C. Length-weight relationship of 12 species of freshwater fish caught in the middle and lower stretches of the Negro River basin, Brazilian Amazon. *Journal of Applied Ichthyology* **2021**, *37*, 626-630, doi:https://doi.org/10.1111/jai.14210.
- Urdaneta, P.; Eduardo, R.; Pasquier, A., de; Josefina, G. Aspectos biológicos-pesqueros de los bagres paleton (*Sorubim* sp.), malarmo (*Platysilurus malarmo*) y doncella (*Ageneiosus* sp.) desembarcados en Puerto Concha, municipio Colon, Estado Zulia, Venezuela. *Revista Científica de la Facultad de Ciencias Veterinarias* **2000**, *10*, 100+.

#### **Pseudopimelodidae**

- Allard, L.; Toussaint, A.; Vigouroux, R.; Brosse, S. Length-weight relationships of 58 fish species in French Guiana streams. *Journal of Applied Ichthyology* **2015**, *31*, 567-570, doi:10.1111/jai.12712.

#### **Schilbeidae**

- Siddik, M.A.B.; Chaklader, M.R.; Hanif, M.A.; Islam, M.A.; Fotedar, R. Length-weight relationships of four fish species from a coastal artisanal fishery, southern Bangladesh. *Journal of Applied Ichthyology* **2016**, *32*, 1300-1302, doi:https://doi.org/10.1111/jai.13181.

#### **Stem Euteleostei**

##### *Aulopiformes*

#### **Alepisauridae**

- Wu, F.; Kindong, R.; Tian, S.; Dai, X. The development of length-weight relationships for four pelagic fish species in the tropical Northwest Pacific Ocean. *Journal of Applied Ichthyology* **2018**, *34*, 717-719, doi:https://doi.org/10.1111/jai.13533.

#### **Synodontidae**

- Ateş, C.; Cerim, H.; Çelik, M. Length-weight relationships of commercial indigenous and Lessepsian fishes in Gökova Bay, Turkey. *Cahiers de Biologie Marine* **2017**, *58*, 43-47, doi:10.21411/CBM.A.6374FD88.

##### *Esociformes*

#### **Esocidae**

- Casselman, J.M.; Crossman, E.J. Size, age, and growth of trophy muskellunge and muskellunge-northern pike hybrids - the cleithrum project, 1979-1983. *American Fisheries Society Special Publication* **1986**, *15*.

Daviscourt, J.; Huertas, J.; Courtney, M. An Assessment of Weight-Length Relationships for Muskellunge, Northern Pike, and Chain Pickerel in Carlander's Handbook of Freshwater Fishery Biology. *eprint arXiv:1107.3112* **2011**, doi:10.48550/arXiv.1107.3112.

Milardi, M.; Lappalainen, J.; Juntunen, T. Variation in length, girth and weight of large northern pikes (*Esox lucius*) in Finland. *Ann. Zool. Fenn.* **2014**, *51*, 335-339, doi:10.5735/086.051.0305.

## **Umbridae**

Parker, J.; Fritts, M.W.; DeBoer, J.A. Length-weight relationships for small Midwestern US fishes. *Journal of Applied Ichthyology* **2018**, *34*, 1081-1083, doi:10.1111/jai.13721.

## *Gadiformes*

### **Gadidae**

Williams, I. Atlas of length-weight relationships of 93 fish and crustacean species from the North Sea and the North-East Atlantic (No. 12). **2013**, 552, doi:10.3220/WP\_12\_2013.

## *Percopsiformes*

### **Percopsidae**

Carlander, K.D. *Handbook of freshwater fishery biology, volume 1*; The Iowa State University Press: Ames, 1969; p. 752.

## *Salmoniformes*

### **Salmonidae**

Gilham, A.T.; Brown, M.L.; Jordan, G.R. Proposed Standard Weight (Ws) Equations for Arctic Grayling. *North American Journal of Fisheries Management* **2021**, *41*, 739-745, doi:10.1002/nafm.10576.

Hyatt, M.W.; Hubert, W.A. Proposed Standard-Weight Equations for Brook Trout. *North American Journal of Fisheries Management* **2001**, *21*, 253-254, doi:10.1577/1548-8675(2001)021<0253:PSWEFB>2.0.CO;2.

Jellyman, P.G.; Booker, D.J.; Crow, S.K.; Bonnett, M.L.; Jellyman, D.J. Does one size fit all? An evaluation of length-weight relationships for New Zealand's freshwater fish species. *New Zealand Journal of Marine and Freshwater Research* **2013**, *47*, 450-468, doi:10.1080/00288330.2013.781510.

Simpkins, D.G.; Hubert, W.A. Proposed Revision of the Standard-Weight Equation for Rainbow Trout. *Journal of Freshwater Ecology* **1996**, *11*, 319-325, doi:10.1080/02705060.1996.9664454.

Stauffer, T.M. Fecundity of Coho Salmon (*Oncorhynchus kisutch*) from the Great Lakes and a Comparison with Ocean Salmon. *Journal of the Fisheries Research Board of Canada* **1976**, *33*, 1150-1155, doi:10.1139/f76-144.

Tot, A.; Aras, M.S. Length-weight relationship of Black Sea trout (*Salmo labrax*, Pallas 1811) inhabiting Ilgaz Stream Basin, Turkey. *Journal of Biometry Studies* **2021**, *1*, 16-19, doi:10.29329/JofBS.2021.348.03.

## *Acanthopterygii*

## *Atheriniformes*

### **Atherinopsidae**

Parker, J.; Fritts, M.W.; DeBoer, J.A. Length-weight relationships for small Midwestern US fishes. *Journal of Applied Ichthyology* **2018**, *34*, 1081-1083, doi:10.1111/jai.13721.

Vega-Cendejas, M.; Peralta-Meixuero, M.; Hernández de Santillana, M. Length–weight relations of fishes inhabiting a hyperhaline coastal lagoon in Yucatan, Mexico. *Acta Ichthyologica et Piscatoria* **2017**, 47, 411-415, doi:10.3750/aiep/02239.

#### *Beloniformes*

##### **Belonidae**

Kulbicki, M.; Guillemot, N.; Amand, M. A general approach to length-weight relationships for New Caledonian lagoon fishes. *Cybium* **2005**, 29, 232-252.

##### **Exocoetidae**

Chang, S.-K.; Yuan, T.-L.; Hoyle, S.D.; Farley, J.H.; Shiao, J.-C. Growth Parameters and Spawning Season Estimation of Four Important Flyingfishes in the Kuroshio Current Off Taiwan and Implications From Comparisons With Global Studies. *Frontiers in Marine Science* **2022**, 8, doi:10.3389/fmars.2021.747382.

#### *Beryciformes*

##### **Berycidae**

Ferreira, S.; Sousa, R.; Delgado, J.; Carvalho, D.; Chada, T. Weight-length relationships for demersal fish species caught off the Madeira archipelago (eastern-central Atlantic). *Journal of Applied Ichthyology* **2008**, 24, 93-95, doi:10.1111/j.1439-0426.2007.01027.x.

#### *Carangaria incertae sedis*

##### **Centropomidae**

Meads, D.R.; Crawford, M.K.; Dockendorf, K.J. Predicting Weights of Striped Bass *Morone saxatilis* in the Roanoke River, North Carolina. *Journal of North Carolina Academy of Science* **2011**, 127, 216-218, doi:10.7572/2167-5880-127.3.216.

Puentes, V.; Escobar, F.D.; Polo, C.J.; Alonso, J.C. Estado de los principales recursos pesqueros de Colombia - 2014. **2014**, 244.

##### **Polynemidae**

Kazemi, S.H.; Paighambari, S.Y.; Daliri, M.; Abaspour Naderi, R. Length-weight and length-length relationships, condition factors and optimal length of some fish species from the Persian Gulf and Oman Sea. *International Journal of Aquatic Biology* **2013**, 1, 167-174, doi:10.22034/ijab.v1i4.68.

##### **Sphyraenidae**

De Sylva, D.P. *Systematics and life history of great barracuda*; University of Miami Press: Miami, 1963; p. 179.

Lima, J.S.; Costa, I.D.; Zalmon, I.R. Length-weight relationship of fish species captured around an artificial offshore reef (northern Rio de Janeiro, Brazil). *Journal of Applied Ichthyology* **2020**, 37, 337-341, doi:10.1111/jai.14109.

Roul, S.K.; Akhil, A.R.; Rethesh, T.B.; Rajesh, K.M.; Ganga, U.; Abdussamad, E.M.; Rohit, P. Length-Weight Relationships of Fifty Fish Species from Indian Waters. *Thalassas: An International Journal of Marine Sciences* **2020**, 36, 309-314, doi:10.1007/s41208-020-00223-x.

Williams, F. Further Notes on the Biology of East African Pelagic Fishes of the Families Carangidae and Sphyraenidae. *East African Agricultural and Forestry Journal* **1965**, 31, 141-168, doi:10.1080/00128325.1965.11662035.

### *Carangiformes*

#### **Carangidae**

Bohnsack, J.A.; Harper, D.E. Length-weight relationships of selected marine reef fishes from the southeastern United States and the Caribbean. *NOAA Technical Memorandum* **1988**, NMFS-SEFC-215, 31.

Frota, L.O.; Costa, P.A.S.; Braga, A.C. Length-weight relationships of marine fishes from the central Brazilian coast. *Naga* **2004**, 27, 20-26.

Gumanao, G.S.; Saceda-Cardoza, M.M.; Mueller, B.; Bos, A.R. Length-weight and length-length relationships of 139 Indo-Pacific fish species (Teleostei) from the Davao Gulf, Philippines. *Journal of Applied Ichthyology* **2016**, 32, 377-385, doi:10.1111/jai.12993.

Kulbicki, M.; Guillemot, N.; Amand, M. A general approach to length-weight relationships for New Caledonian lagoon fishes. *Cybiu* **2005**, 29, 232-252.

Matthews, T.; Ochavillo, D.; Felise, S.; Letalie, T.; Letuane, M.; Schuster, E.; Soonaolo, A.a.; Tofaeono, S.; Tua, A.; Tuilagi, F. *Length-weight Relationships for 71 Reef and Bottomfish Species from Tutuila and Aunu'u, American Samoa*; Pacific Islands Fisheries Science Center, National Marine Fisheries Service: Honolulu, 2019; p. 9.

Roul, S.K.; Akhil, A.R.; Retheesh, T.B.; Rajesh, K.M.; Ganga, U.; Abdussamad, E.M.; Rohit, P. Length-Weight Relationships of Fifty Fish Species from Indian Waters. *Thalassas: An International Journal of Marine Sciences* **2020**, 36, 309-314, doi:10.1007/s41208-020-00223-x.

Tagliafico, A.; Rago, N.; Rangel, M.S. Length-Weight Relationships of 22 commercial fish from Margarita Island, Venezuela. *Journal of Research in Biology* **2015**, 5, 1707-1712.

#### **Coryphanidae**

Castro, J.J.; Santiago, J.A.; Hernández-García, V.; Pla, C. Growth and reproduction of the dolphinfish (*Coryphaena equiselis* and *Coryphaena hippurus*) in the Canary Islands, Central-East Atlantic (preliminary results). *Scientia Marina* **1999**, 63, 317-325.

#### **Echeneidae**

Pulver, J.R.; Whatley, A. Length-weight relationships, location, and depth distributions for select Gulf of Mexico reef fish species. *NOAA Technical Memorandum* **2016**, NMFS-SEFSC-693, 1-100, doi:10.7289/V58G8HQ2.

### *Centrarchiformes*

#### **Centrarchidae**

Bister, T.J.; Willis, D.W.; Brown, M.L.; Jordan, S.M.; Neumann, R.M.; Quist, M.C.; Guy, C.S. Proposed Standard Weight (Ws) Equations and Standard Length Categories for 18 Warmwater Nongame and Riverine Fish Species. *North American Journal of Fisheries Management* **2000**, 20, 570-574, doi:10.1577/1548-8675(2000)020<0570:Pswwse>2.3.Co;2.

Henson, J.C. Quantitative description and development of a species-specific growth form for largemouth bass, with application to the relative weight index. Texas A&M University, College Station, 1991.

- Kolander, T.D.; Willis, D.W.; Murphy, B.R. Proposed Revision of the Standard Weight (WS) Equation for Smallmouth Bass. *North American Journal of Fisheries Management* **1993**, *13*, 398-400, doi:[https://doi.org/10.1577/1548-8675\(1993\)013<0398:PROTSW>2.3.CO;2](https://doi.org/10.1577/1548-8675(1993)013<0398:PROTSW>2.3.CO;2).
- Neumann, R.M.; Murphy, B.R. Evaluation of the Relative Weight (Wr) Index for Assessment of White Crappie and Black Crappie Populations. *North American Journal of Fisheries Management* **1991**, *11*, 543-555, doi:[https://doi.org/10.1577/1548-8675\(1991\)011<0543:EOTRWW>2.3.CO;2](https://doi.org/10.1577/1548-8675(1991)011<0543:EOTRWW>2.3.CO;2).
- Osenberg, C.W.; Werner, E.E.; Mittelbach, G.G.; Hall, D.J. Growth patterns in bluegill (*Lepomis macrochirus*) and pumpkinseed (*L. gibbosus*) sunfish: environmental variation and the importance of ontogenetic niche shifts. *Can J For Res* **1988**, *45*, 17-26.

### *Cichliiformes*

#### **Cichlidae**

- Duponchelle, F.; Ribbinck, A.J.; Msukwa, A.; Mafuka, J.; Mandere, D. Depth distribution and breeding patterns of the demersal species most commonly caught by trawling in the South West Arm of Lake Malawi. In *Fish Ecology Report. Lake Malawi/Nyasa/Niassa Biodiversity Conservation Project*, Duponchelle, F., Ribbinck, A.J., Eds.; Southern African Development Community, Gaborone, Botswana/Global Environment Facility: Washington D.C., 2000; pp. 15-168.

### *Cyprinodontiformes*

#### **Fundulidae**

- Phillips, E.C.; Ewert, Y.; Speares, P.A. Fecundity, Age and Growth, and Diet of *Fundulus diaphanus* (Banded Killifish) in Presque Isle Bay, Lake Erie. *Northeastern Naturalist* **2007**, *14*, 269-278, doi:[10.1656/1092-6194\(2007\)14\[269:FAAGAD\]2.0.CO;2](https://doi.org/10.1656/1092-6194(2007)14[269:FAAGAD]2.0.CO;2).

### *Eupercaria incertae sedis*

#### **Lobotidae**

- Merriner, J.V.; Foster, W.A. Life History Aspects of the Tripletail, *Lobotes surinamensis* (Chordata-Pisces-Lobotidae), in North Carolina Waters. *Journal of the Elisha Mitchell Scientific Society* **1974**, *90*, 121-124.

#### **Malacanthidae**

- Pulver, J.R.; Whatley, A. Length-weight relationships, location, and depth distributions for select Gulf of Mexico reef fish species. *NOAA Technical Memorandum* **2016**, *NMFS-SEFSC-693*, 1-100, doi:[10.7289/V58G8HQ2](https://doi.org/10.7289/V58G8HQ2).

#### **Moronidae**

- Meads, D.R.; Crawford, M.K.; Dockendorf, K.J. Predicting Weights of Striped Bass *Morone saxatilis* in the Roanoke River, North Carolina. *Journal of North Carolina Academy of Science* **2011**, *127*, 216-218, doi:[10.7572/2167-5880-127.3.216](https://doi.org/10.7572/2167-5880-127.3.216).

#### **Sciaenidae**

- Haimovici, M.; Velasco, G. Length-weight relationships of marine fishes from southern Brazil. *Naga* **2000**, *23*, 19-23.
- Harrington, R.A.; Matlock, G.C.; Weaver, J.C. Standard-total length, total length-whole weight and dressed-whole weight relationships for selected species from Texas bays. *Texas Parks and Wildlife Department Technical Series* **1979**, *26*, 1-6.



## *Gobiiformes*

### **Eleotridae**

Cooney, P.B.; Kwak, T.J. Development of Standard Weight Equations for Caribbean and Gulf of Mexico Amphidromous Fishes. *North American Journal of Fisheries Management* **2011**, *30*, 1203-1209, doi:10.1577/m10-058.1.

### **Gobiidae**

Phillips, E.C.; Washek, M.E.; Hertel, A.W.; Niebel, B.M. The Round Goby (*Neogobius melanostomus*) in Pennsylvania Tributary Streams of Lake Erie. *Journal of Great Lakes Research* **2003**, *29*, 34-40.

## *Istiophoriformes*

### **Istiophoridae**

Lenarz, W.H.; Nakamura, E.L. Analysis of Length and Weight Data On Three Species of Billfish From the Western Atlantic Ocean In *Proceedings of the International Billfish Symposium, Kailua-Kona, Hawaii, 9-12 August 1982. Part 2: Review and contributed papers*, Shomura, R.S., Williams, F., Eds.; U.S. Dept. Commer., NOAA Tech. Rep. NMFS SSRF675: 1972; pp. 121-125.

Prager, M.H.; Prince, E.D.; Lee, D.W. Empirical length and weight conversions for blue marlin, white marlin, and sailfish from the North Atlantic Ocean. *Bulletin of Marine Science* **1995**, *56*, 201-210.

## *Kurtiformes*

### **Apogonidae**

Froese, R.; Thorson, J.T.; Reyes, R.B. A Bayesian approach for estimating length-weight relationships in fishes. *Journal of Applied Ichthyology* **2014**, *30*, 78-85, doi:10.1111/jai.12299.

## *Labriformes*

### **Scaridae**

Kulbicki, M.; Guillemot, N.; Amand, M. A general approach to length-weight relationships for New Caledonian lagoon fishes. *Cybium* **2005**, *29*, 232-252.

Taylor, B.M.; Hamilton, R.J.; Almany, G.R.; Howard Choat, J. The world's largest parrotfish has slow growth and a complex reproductive ecology. *Coral Reefs* **2018**, *37*, 1197-1208, doi:10.1007/s00338-018-1723-9.

## *Lutjaniformes*

### **Haemulidae**

Al-Busaidi, H.K.; Govender, A.; Al-Jufaily, S.M.; Al-Marzouqi, A. Population Biology Including Population Structure, Spawning Cycle, and Maturity of *Plectorhinchus schotaf* (Forsskål, 1775) (Family: Haemulidae) Collected from the Arabian Sea Coast of Oman. In *The Arabian Seas: Biodiversity, Environmental Challenges and Conservation Measures*, Jawad, L.A., Ed.; Springer International Publishing: Cham, 2021; pp. 595-624.

### **Lutjanidae**

Burton, M.L.; Potts, J.C. Age, growth, and natural mortality of cubera snapper, *Lutjanus cyanopterus*, from the southeastern United States. *Bulletin of Marine Science* **2017**, *93*, 815-828, doi:10.5343/bms.2016.1116.

- Frota, L.O.; Costa, P.A.S.; Braga, A.C. Length-weight relationships of marine fishes from the central Brazilian coast. *Naga* **2004**, *27*, 20-26.
- Kulbicki, M.; Guillemot, N.; Amand, M. A general approach to length-weight relationships for New Caledonian lagoon fishes. *Cybium* **2005**, *29*, 232-252.
- Manickchand-Heileman, S.C.; Phillip, D.A.T. Reproduction, age and growth of the Caribbean red snapper *Lutjanus purpureus* in waters off Trinidad and Tobago. In *Biology, fisheries and culture of tropical groupers and snappers*, Arreguín-Sánchez, F., Munro, J.L., Balgos, M.C., Pauly, D., Eds.; ICLARM Conf. Proc.; 1996.
- Murray, P.A.; Moore, E.A. Some morphometric relationships in *Etelis oculatus* Valenciennes (queen snapper), landed in St. Lucia, W.I. *Proceedings of the Gulf and Caribbean Fisheries Institute 41st Annual Session* **1992**, *41*, 416-421.
- Oliveira, M.T.; Santos, M.N.; Coelho, R.; Monteiro, V.; Martins, A.; Lino, P.G. Weight-length and length-length relationships for reef fish species from the Cape Verde Archipelago (tropical north-eastern Atlantic). *Journal of Applied Ichthyology* **2015**, *31*, 236-241, doi:10.1111/jai.12497.

### *Mugiliformes*

#### **Mugilidae**

- Viana, A.P.; Lucena-Frédou, F.; Ménard, F.; Frédou, T.; Ferreira, V.; Lira, A.S.; Le Loc'h, F. Length-weight relations of 70 fish species from tropical coastal region of Pernambuco, Northeast Brazil. *Acta Ichthyologica et Piscatoria* **2016**, *46*, 271-277, doi:10.3750/aip2016.46.3.12.

### *Ophidiiformes*

#### **Ophidiidae**

- Pan, M.; Ouréns, R.; Dione, L.; Samba, I.; Sánchez-Carnero, N.; Freire, J. Length-weight relationships for 13 fish species from a coastal artisanal fishery at Cape Verde peninsula (Senegal). *Journal of Applied Ichthyology* **2015**, *31*, 1177-1179, doi:10.1111/jai.12890.

### *Pempheriformes*

#### **Epigoniidae**

- Merella, P.; Quetglas, A.; Alemany, F.; Carbonell, A. Length-weight relationship of fishes and cephalopods from the Balearic Islands (western Mediterranean). *Naga* **1997**, *20*, 66-68.

#### **Pempheridae**

- Das, M.K.; Rajendar, R.; Surendar, C.; Padmanaban, P. Length-weight relationships for five fish species from Gulf of Mannar, southeast coast of India. *Indian Journal of Geo-Marine Sciences* **2022**, *51*, 573-575, doi:10.56042/ijms.v51i06.43547.

#### **Scombropidae**

- De La Hoz-M, J.; Motta, J.; Paramo, J. Length-weight relationships for 36 deep-sea fish in the Colombian Caribbean Sea. *Journal of Applied Ichthyology* **2016**, *32*, 1356-1359, doi:https://doi.org/10.1111/jai.13217.

### *Perciformes*

#### **Percidae**

- Devine, J.A.; Schram, S.T.; Hansen, M.J. A food web analysis of the fishery in Chequamegon Bay, Lake Superior. **2005**.
- Hassler, W.W. Age and growth of the sauger, *Stizostedion canadense canadense* (Smith), in Norris Reservoir, Tennessee. *Journal of the Tennessee Academy of Science* **1957**, *32*, 55-76.
- Hatch, J.T. *Comparative growth, reproduction, habitat and food utilization of darters of the St. Croix river drainage*; Minnesota Nongame Wildlife Program, Final Report: 1986; p. 40.
- Hayat, S. Growth of rainbow darter (*Etheostoma caeruleum*) in the Grand River watershed. University of Waterloo, Waterloo, 2020.
- Propst, D.L.; Carlson, C.A. Life History Notes and Distribution of the Johnny Darter, *Etheostoma nigrum* (Percidae), in Colorado. *The Southwestern Naturalist* **1989**, *34*, 250-259, doi:10.2307/3671735.

### **Pomatomidae**

- Haimovici, M.; Velasco, G. Length-weight relationships of marine fishes from southern Brazil. *Naga* **2000**, *23*, 19-23.

### **Serranidae**

- Bullock, L.H.; Godcharles, M.F.; Crabtree, R.E. Reproduction of yellowedge grouper, *Epinephelus flavolimbatus*, from the eastern Gulf of Mexico. *Bulletin of Marine Science* **1996**, *59*, 216-224.
- Bullock, L.H.; Murphy, M.D.; Godcharles, M.F.; Mitchell, M.E. Age, growth, and reproduction of jewfish *Epinephelus itajara* in the eastern Gulf of Mexico. *Fishery Bulletin* **1992**, *90*, 243-249.
- Burgos, J.M.; Sedberry, G.R.; Wyanski, D.M.; Harris, P.J. Life history of red grouper (*Epinephelus morio*) off the coasts of North Carolina and South Carolina. *Bulletin of Marine Science* **2007**, *80*, 45-65.
- Carter, J.; Marrow, G.J.; Pryor, V. Aspects of the ecology and reproduction of Nassau Grouper (*Epinephelus striatus*) off the coast of Belize, Central America. *Proceedings of the Gulf and Caribbean Fisheries Institute* **1994**, *43*, 65-111.
- Craig, M.T.; Pondella, D.J., III; Hafner, J.C. Analysis of age and growth in two eastern Pacific groupers (Serranidae: Epinephelinae). *Bulletin of Marine Science* **1999**, *65*, 807-814.
- Nagelkerken, W.P. Biology of the graysby, *Epinephelus cruentatus*, of the coral reef of Curaçao. *Studies on the Fauna of Curaçao and other Caribbean Islands* **1979**, *186*, 1-118.
- Posada-Lopez, J.M. Life-history, reproductive biology and sexual pattern of the Creole fish, *Paranthias furcifer* (Valenciennes, 1828) (Pisces: Serranidae). University of Puerto Rico, Mayagüez, 1996.
- Pulster, E.L.; Gracia, A.; Armenteros, M.; Carr, B.E.; Mrowicki, J.; Murawski, S.A. Chronic PAH exposures and associated declines in fish health indices observed for ten grouper species in the Gulf of Mexico. *Sci Total Environ* **2020**, *703*, 135551, doi:https://doi.org/10.1016/j.scitotenv.2019.135551.
- Pulver, J.R.; Whatley, A. Length-weight relationships, location, and depth distributions for select Gulf of Mexico reef fish species. *NOAA Technical Memorandum* **2016**, *NMFS-SEFSC-693*, 1-100, doi:10.7289/V58G8HQ2.
- Sadovy, Y.; Colin, P.L.; Domeier, M.L. Aggregation and Spawning in the Tiger Grouper, *Mycteroperca tigris* (Pisces: Serranidae). *Copeia* **1994**, *1994*, 511-516, doi:10.2307/1447001.
- Ziskin, G.L. Age, growth and reproduction of speckled hind, *Epinephelus drummondhayi*, off the Atlantic coast of the southeast United States. College of Charleston, Charleston, 2008.

### *Priacanthiformes*

### **Priacanthidae**

Jurado-Ruzafa, A.; Martín-Sosa, P. Length-weight relationship of 12 demersal fish species in the Canary Islands (Spain, CE Atlantic). *Journal of Applied Ichthyology* **2022**, *38*, 268-272, doi:10.1111/jai.14307.

### *Scombriformes*

#### **Bramidae**

Varghese, S.P.; Vijayakumaran, K.; Gulati, D.K. Pelagic megafauna bycatch in the tuna longline fisheries off India. **2013**, 15.

Wu, F.; Kindong, R.; Tian, S.; Dai, X. The development of length–weight relationships for four pelagic fish species in the tropical Northwest Pacific Ocean. *Journal of Applied Ichthyology* **2018**, *34*, 717-719, doi:https://doi.org/10.1111/jai.13533.

#### **Centrolophidae**

Coull, K.A.; Jermyn, A.S.; Newton, A.W.; Henderson, G.I.; Hall, W.B. *Length/weight relationships for 88 species of fish encountered in the North East Atlantic*; 1989; p. 81.

Pulver, J.R.; Whatley, A. Length-weight relationships, location, and depth distributions for select Gulf of Mexico reef fish species. *NOAA Technical Memorandum* **2016**, NMFS-SEFSC-693, 1-100, doi:10.7289/V58G8HQ2.

#### **Gempylidae**

Brouard, F.; Grandperrin, R. Deep-bottom fishes of the outer reef slope in Vanuatu. In Proceedings of the South Pacific Commission 17th regional technical meeting on fisheries (Noumea, New Caledonia, 5–19 August, 1985), 1985; pp. 1–127.

Ho, H.C.; Motomura, H.; Hata, H.; Jiang, W.C. Review of the fish genus *Epinnula* Poey (Perciformes: Gempylidae), with description of a new species from the Pacific Ocean. *Zootaxa* **2017**, *4363*, 393-408, doi:10.11646/zootaxa.4363.3.5.

Keller, H.R.; Kerstetter, D.W. Length–length and length–weight relationships of oilfish (*Ruvettus pretiosus*), escolar (*Lepidocybium flavobrunneum*), snake mackerel (*Gempylus serpens*), and longnose lancetfish (*Alepisaurus ferox*) from the Gulf of Mexico and the western North Atlantic Ocean. *Journal of Applied Ichthyology* **2014**, *30*, 241-243, doi:https://doi.org/10.1111/jai.12229.

#### **Scombridae (Thunnini)**

Tandog-Edralin, D.D.; Cortez-Zaragoza, E.C.; Dalzell, P.; Pauly, D. Some aspects of the biology and population dynamics of skipjack (*Katsuwonus pelamis*) in Philippine waters. In Proceedings of the FAO/IPTP Second Meeting of Tuna Research Groups of the Southeast Asian Region, Manila, 1987; pp. 1–85.

Vieira, K.R.; Oliveira, J.E.L.; Barbalho, M.C.; Aldatz, J.P. Aspects of the dynamic population of blackfin tuna (*Thunnus atlanticus* - Lesson, 1831) caught in the Northeast Brazil. *Collective Volumes of Scientific Papers ICCAT* **2005**, *58*, 1623-1628.

Wolfe, D.C.; Webb, B.F. Slender tuna (*Allothunnus fallai* Serventy): First record of bulk catches, Tasmania, 1974. *Australian Journal of Marine and Freshwater Research* **1975**, *26*, 213-221.

Zhu, G.; Xu, L.; Zhou, Y.; Song, L.; Dai, X. Length-weight relationships for bigeye tuna (*Thunnus obesus*), yellowfin tuna (*Thunnus albacares*) and albacore (*Thunnus alalunga*) (Perciformes: Scombrinae) in the Atlantic, Indian and Eastern Pacific oceans. *Collective Volume of Scientific Papers - ICCAT* **2010**, *65*, 717-724.

#### **Scombridae (Other)**

- Begg, G.A.; Sellin, M.J. Age and growth of school mackerel (*Scomberomorus queenslandicus*) and spotted mackerel (*S. munroi*) in Queensland east-coast waters with implications for stock structure. *Marine and Freshwater Research* **1998**, *49*, doi:10.1071/mf97057.
- Canal, E.R. Niveles troficos del bonito *Sarda sarda chilensis*, Cuvier en el area del Callao. Universidad Nacional San Antonio Abad de Cusco, Cusco, 1974.
- Griffiths, S.P.; Fry, G.C.; Manson, F.J.; Pillans, R.D. Morphometric relationships for four Scombridae fish species in Australian waters. *Journal of Applied Ichthyology* **2017**, *33*, 583-585, doi:10.1111/jai.13136.
- Huh, S.H.; Jeong, J.M.; Park, J.M. Length-weight and length-length relationships for six commercial fishes from southern Korean waters. *Journal of Applied Ichthyology* **2017**, *33*, 649-651, doi:10.1111/jai.13345.
- Pulver, J.R.; Whatley, A. Length-weight relationships, location, and depth distributions for select Gulf of Mexico reef fish species. *NOAA Technical Memorandum* **2016**, NMFS-SEFSC-693, 1-100, doi:10.7289/V58G8HQ2.
- Ralston, S. Length-weight regressions and condition indices of lutjanids and other deep slope fishes from the Mariana Archipelago. *Micronesica* **1988**, *21*, 189-197.
- Sivadas, M.; Abdussamad, E.M.; Jasmine, S.; Rohit, P.; Said Koya, K.P.; Ghosh, S.; Joshi, K.K.; Dhokia, H.K.; Prakasan, D.; Bineesh, K.K. Assessment of the fishery and stock of striped bonito, *Sarda orientalis* (Temminck and Schlegel, 1844) along Kerala coast with a general description of its fishery from Indian coast. *Indian Journal of Fisheries* **2012**, *59*, 57-61.
- Stewart, J.; Robbins, W.D.; Rowling, K.; Hegarty, A.; Gould, A. A multifaceted approach to modelling growth of the Australian bonito, *Sarda australis* (Family Scombridae), with some observations on its reproductive biology. *Marine and Freshwater Research* **2013**, *64*, doi:10.1071/mf12249.

## *Spariformes*

### **Sparidae**

- Bohnsack, J.A.; Harper, D.E. Length-weight relationships of selected marine reef fishes from the southeastern United States and the Caribbean. *NOAA Technical Memorandum* **1988**, NMFS-SEFC-215, 31.
- Pulver, J.R.; Whatley, A. Length-weight relationships, location, and depth distributions for select Gulf of Mexico reef fish species. *NOAA Technical Memorandum* **2016**, NMFS-SEFSC-693, 1-100, doi:10.7289/V58G8HQ2.

## *Syngnathiformes*

### **Aulostomidae**

- Eduardo, L.N.; Frédou, T.; Lira, A.S.; Silva, L.V.S.; Ferreira, B.P.; Bertrand, A.; Ménard, F.; Lucena-Frédou, F. Length-weight relationship of thirteen demersal fishes from the tropical Brazilian continental shelf. *Journal of Applied Ichthyology* **2018**, *35*, 590-593, doi:10.1111/jai.13831.

## *Tetraodontiformes*

### **Balistidae**

- Pulver, J.R.; Whatley, A. Length-weight relationships, location, and depth distributions for select Gulf of Mexico reef fish species. *NOAA Technical Memorandum* **2016**, NMFS-SEFSC-693, 1-100, doi:10.7289/V58G8HQ2.

### **Monacanthidae**

Bohnsack, J.A.; Harper, D.E. Length-weight relationships of selected marine reef fishes from the southeastern United States and the Caribbean. *NOAA Technical Memorandum* **1988**, NMFS-SEFC-215, 31.

Yagi, M.; Yamada, M.; Shimoda, M.; Uchida, J.; Kinoshita, T.; Shimizu, K.; Yamawaki, N.; Aoshima, T.; Morii, Y.; Kanehara, H. Length–weight relationships of 22 fish species from the East China Sea. *Journal of Applied Ichthyology* **2015**, *31*, 252-254, doi:<https://doi.org/10.1111/jai.12648>.

#### **Tetraodontidae**

Haimovici, M.; Velasco, G. Length-weight relationships of marine fishes from southern Brazil. *Naga* **2000**, *23*, 19-23.

Vianna, M.; Costa, F.E.S.; Ferreira, C.N. Length-weight relationship of fish caught as by-catch by shrimp fishery in the southeastern Coast of Brazil. *Boletim do Instituto de Pesca, São Paulo* **2004**, *30*, 81-85.
